# Supplementary material for: Aluminium catalysed oligomerisation in cement-forming silicate systems
Source: Royal Society of Chemistry journal article supplement (doi:10.1039/d2cp03918d), 2022-12-08
Supplement: d2cp03918d1.pdf [file d2cp03918d1.pdf]

# Supplementary Information

## for

# Aluminium Catalysed Oligomerisation in Cement-Forming Silicate Systems

Mohammed S. Salha,<sup>a,c</sup> Rickey Y. Yada,<sup>b</sup> David H. Farrar,<sup>c</sup> Gregory A. Chass,<sup>b,c,d,\*</sup> Kun V. Tian<sup>b,c,e,\*</sup> and Enrico Bodo<sup>a</sup>

<sup>a</sup> Department of Chemistry, Sapienza University of Rome, Piazzale Aldo Moro 5, 00185, Roma, Italy

<sup>b</sup> Faculty of Land and Food Systems, The University of British Columbia, Vancouver, British Columbia, V6T 1Z4, Canada

<sup>c</sup> Department of Chemistry and Chemical Biology, McMaster University, Hamilton, Ontario, L8S 4M1, Canada

<sup>d</sup> School of Physical and Chemical Sciences, Queen Mary University of London, London E1 4NS, United Kingdom

<sup>e</sup> Department of Chemical Science and Pharmaceutical Technologies, Sapienza University of Rome, Piazzale Aldo Moro 5, 00185, Roma, Italy

| <b>Contents</b>                                              | <b>Page</b> |
|--------------------------------------------------------------|-------------|
| CAM-B3LYP/6-311G(d,p) Energetics                             | S2          |
| Visual guide to supplementary material                       | S4          |
| Optimised geometries + energetics<br>(B3LYP/6-31G(d,p))      | S5-S30      |
| <b>NEUTRAL MECHANISM</b>                                     |             |
| Neutral Si (No Al)                                           | S5          |
| Neutral Al-4                                                 | S8          |
| Neutral Al-5                                                 | S11         |
| Neutral Al-6                                                 | S13         |
| <b>ANIONIC MECHANISM</b>                                     |             |
| Anionic Si (No Al)                                           | S16         |
| Anionic Q0 Al                                                | S21         |
| Anionic Q1 Al                                                | S26         |
| Optimised geometries + energetics<br>(CAM-B3LYP/6-311G(d,p)) | S31-S39     |
| Anionic Si (No Al)                                           | S31         |
| Anionic Q1 Al                                                | S35         |

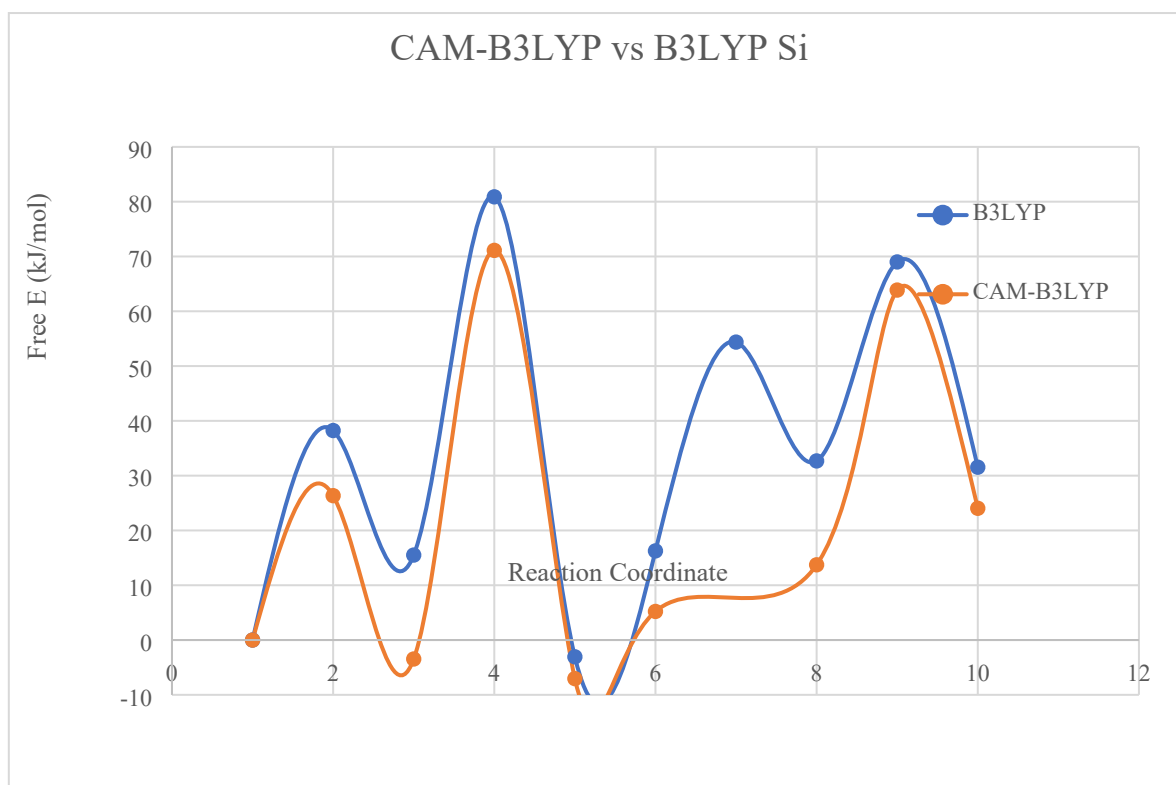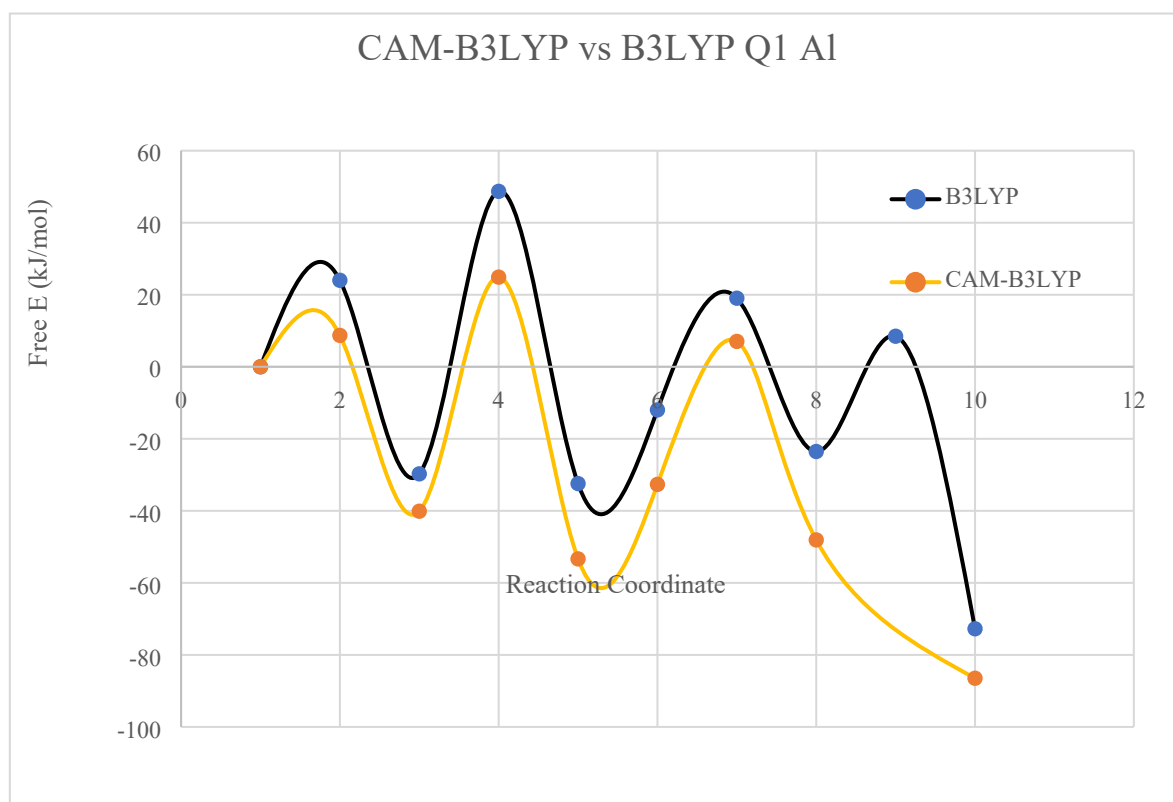

**Figure S1** Free energies ( $\text{kJ}\cdot\text{mol}^{-1}$ ) of the B3LYP-D3 and CAM-B3LYP optimised geometries for each stationary (critical) point along the reaction profiles for Si-only (Upper) and Q1 Al (Lower) systems.

**Table S1** Energy barriers for each TS in CAM-B3LYP and B3LYP-D3 (see main text).

| Barriers | Si      |           | Al-Q1   |           |
|----------|---------|-----------|---------|-----------|
|          | B3LYPD3 | CAM-B3LYP | B3LYPD3 | CAM-B3LYP |
| TS1      | 38.2    | 26.3      | 24      | 8.7       |
| TS2      | 65.4    | 74.5      | 78.4    | 64.9      |
| TS3      | 38.1    | -         | 31      | 39.6      |
| TS4      | 36.2    | 49.3      | 32      | -         |

**Table S2** Free energies of stationary points and transition states for CAM-B3LYP and B3LYP Si + Q1.

| Step | Si      |           | Al-Q1   |           |
|------|---------|-----------|---------|-----------|
|      | B3LYPD3 | CAM-B3LYP | B3LYPD3 | CAM-B3LYP |
| RCT1 | 0.00    | 0.00      | 0.00    | 0.00      |
| TS1  | 38.24   | 26.35     | 24.01   | 8.71      |
| INT  | 15.51   | -3.46     | -29.73  | -40.10    |
| TS2  | 80.88   | 71.11     | 48.71   | 24.89     |
| PRD1 | -3.06   | -7.04     | -32.44  | -53.34    |
| RCT2 | 16.27   | 5.22      | -11.98  | -32.65    |
| TS3  | 54.37   |           | 19.04   | 7.04      |
| INT2 | 32.69   | 13.73     | -23.52  | -48.07    |
| TS4  | 69.00   | 63.87     | 8.48    |           |
| PRD2 | 31.55   | 24.04     | -72.75  | -86.48    |

## Exemplary Data Card of geometry optimised stationary points

Example: H<sub>2</sub>O molecule

### FILE NAME + Graphical Representation

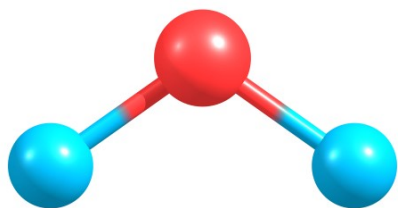

### Cartesian Coordinates of all geometry optimised stationary points

| Atom type | X          | Y          | Z          |
|-----------|------------|------------|------------|
| O         | 1.34146346 | 1.62020904 | 0.00000000 |
| H         | 2.30146346 | 1.62020904 | 0.00000000 |
| H         | 1.02100888 | 2.52514487 | 0.00000000 |

### First nine analytical frequencies of normal modes of vibration

|                |           |           |           |
|----------------|-----------|-----------|-----------|
| Frequencies -- | 1664.9645 | 3800.9563 | 3914.2425 |
| Frequencies -- | #####     | #####     | #####     |
| Frequencies -- | #####     | #####     | #####     |

**Note:** In this case, H<sub>2</sub>O only has 3 ( $3N-6 = 3(3) - 6 = 3$ ) normal modes of vibration. Else for systems with 4 atoms  $3N-6 = 6$  modes would be listed. Systems with 5 atoms or more, would have  $3N-6 = 9$  or more modes, listing the first 9 modes.

### Thermodynamic properties reported

|                                               |                             |
|-----------------------------------------------|-----------------------------|
| Zero-point correction=                        | 0.021370 (Hartree/Particle) |
| Thermal correction to Energy=                 | 0.024205                    |
| Thermal correction to Enthalpy=               | 0.025149                    |
| Thermal correction to Gibbs Free Energy =     | 0.003713                    |
| Sum of electronic and zero-point Energies =   | -76.398367                  |
| Sum of electronic and thermal Energies =      | -76.395532                  |
| Sum of electronic and thermal Enthalpies =    | -76.394588                  |
| Sum of electronic and thermal Free Energies = | -76.416024                  |

Neutral Si  
PENT-Si-RCT-Bondi2.log

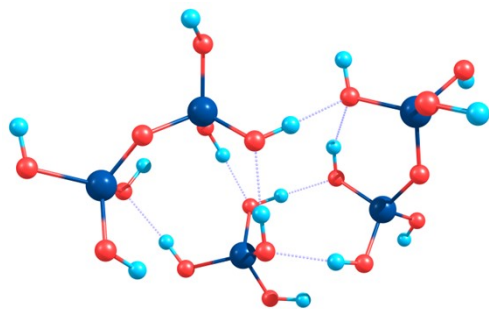

|    |           |           |           |
|----|-----------|-----------|-----------|
| 39 |           |           |           |
| O  | 2.070028  | 0.844995  | 1.350396  |
| O  | 2.302371  | 2.232653  | -0.967287 |
| O  | 4.379147  | 2.176312  | 0.700142  |
| O  | 3.739412  | -0.040456 | -0.550676 |
| O  | 4.872293  | -2.406274 | 0.122378  |
| O  | 2.206869  | -1.855588 | 0.540028  |
| O  | 3.131928  | -2.331306 | -1.898769 |
| O  | -3.896017 | 0.553984  | -1.712491 |
| O  | -2.906428 | -1.615847 | -0.342671 |
| O  | -5.528811 | -1.206281 | -0.717676 |
| O  | -4.043817 | 0.442344  | 0.946913  |
| O  | -0.309498 | -1.274151 | -0.438633 |
| O  | -1.635047 | -0.884244 | 1.924959  |
| O  | -1.353954 | -3.337144 | 1.05745   |
| H  | 2.144381  | -2.689915 | 1.02892   |
| H  | 4.18454   | 3.064111  | 1.030794  |
| H  | 3.803928  | -2.284851 | -2.593205 |
| H  | -5.672845 | -2.027019 | -0.226728 |
| H  | -3.527599 | 0.029881  | 1.662275  |
| H  | -1.226253 | 0.009781  | 1.860416  |
| H  | -1.511723 | -4.015915 | 0.386611  |
| H  | 2.002735  | -0.125245 | 1.439815  |
| H  | 1.471488  | 1.826855  | -1.303572 |
| Si | 3.533419  | -1.664051 | -0.460607 |
| Si | -4.088788 | -0.468983 | -0.447484 |
| H  | 5.343269  | -1.938891 | 0.826913  |
| H  | -3.371776 | 1.34601   | -1.496813 |
| Si | 3.105274  | 1.315895  | 0.133093  |
| Si | -1.532473 | -1.786163 | 0.553085  |
| H  | 0.597696  | -1.473318 | -0.113508 |
| O  | -0.279042 | 1.364898  | -1.216507 |
| H  | -0.309191 | 0.395486  | -1.038156 |
| O  | -0.543083 | 1.604075  | 1.466504  |
| O  | -0.206817 | 3.805266  | -0.186684 |
| O  | -2.504579 | 2.518196  | -0.088998 |
| H  | -3.045717 | 1.981709  | 0.527153  |
| H  | 0.415622  | 1.384919  | 1.560336  |
| Si | -0.874165 | 2.317737  | 0.004561  |
| H  | 0.736077  | 3.782862  | -0.415327 |
| O  | -0.391411 | -3.029703 | -1.877166 |
| H  | -1.081508 | -2.731646 | -2.489627 |
| H  | 0.44782   | -2.964603 | -2.360728 |
| H  | -1.986905 | 0.121185  | 3.733266  |
| H  | 1.490218  | 2.195165  | -0.666244 |
| H  | -0.80065  | -0.154491 | 1.745554  |
| H  | -1.439827 | 0.099448  | -1.568613 |

|                |         |         |         |
|----------------|---------|---------|---------|
| Frequencies -- | 26.9289 | 35.2399 | 37.8426 |
| Frequencies -- | 44.2435 | 50.3114 | 57.1260 |
| Frequencies -- | 60.0850 | 83.3463 | 94.3697 |

|                                              |                             |
|----------------------------------------------|-----------------------------|
| Zero-point correction=                       | 0.250112 (Hartree/Particle) |
| Thermal correction to Energy=                | 0.282877                    |
| Thermal correction to Enthalpy=              | 0.283822                    |
| Thermal correction to Gibbs Free Energy=     | 0.187032                    |
| Sum of electronic and zero-point Energies=   | -2812.065269                |
| Sum of electronic and thermal Energies=      | -2812.032503                |
| Sum of electronic and thermal Enthalpies=    | -2812.031559                |
| Sum of electronic and thermal Free Energies= | -2812.128349                |

PENT-Si-TS-Bondi5.log

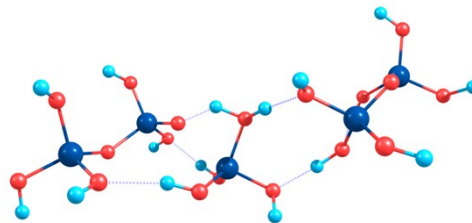

|    |           |           |           |
|----|-----------|-----------|-----------|
| 39 |           |           |           |
| O  | -4.737521 | -1.715632 | -0.669112 |
| O  | -7.003794 | -0.336134 | -0.395412 |
| O  | -6.112088 | -1.754607 | 1.665014  |
| O  | -4.773336 | 0.464988  | 0.928558  |
| O  | -2.086159 | 0.837282  | 1.256622  |
| O  | -3.180326 | 0.599999  | -1.148948 |
| O  | -3.582794 | 2.844209  | 0.459774  |
| O  | 2.051164  | -0.628761 | 0.261359  |
| O  | 4.673937  | -0.578414 | -0.323118 |
| O  | 3.054732  | -2.452144 | -1.359789 |
| O  | 3.739473  | -2.567421 | 1.238543  |
| O  | 4.064312  | 1.908893  | 0.29613   |
| O  | 5.070559  | 0.139366  | 2.166163  |
| O  | 6.689448  | 1.128497  | 0.296394  |
| H  | -2.273728 | 0.754244  | -1.527526 |
| H  | -5.411024 | -1.9773   | 2.292944  |
| H  | -4.426267 | 3.214195  | 0.163576  |
| H  | 3.831641  | -2.764665 | -1.843969 |
| H  | 4.173438  | -2.104646 | 1.972339  |
| H  | 4.932276  | 0.797079  | 2.8609    |
| H  | 6.854562  | 1.479876  | -0.589915 |
| H  | -4.093842 | -1.15782  | -1.14559  |
| H  | -7.566653 | 0.270251  | 0.105654  |
| H  | -3.434128 | 1.214626  | 0.347543  |
| Si | 3.349053  | -1.540347 | 0.001804  |
| H  | -1.863605 | 1.422521  | 1.995211  |
| H  | 0.689454  | -0.769172 | 0.545991  |
| Si | -5.643865 | -0.838331 | 0.383049  |
| Si | 5.138157  | 0.686158  | 0.611424  |
| H  | 4.255137  | 2.780774  | 0.669133  |
| O  | 1.492008  | 1.755434  | -0.83125  |
| H  | 2.352306  | 1.644785  | -0.379005 |
| O  | -0.210017 | -0.461573 | 0.053172  |
| O  | -0.69051  | 1.077362  | -1.929538 |
| H  | -0.586794 | 2.021446  | -2.11039  |
| O  | 1.167618  | -0.641028 | -2.385422 |
| H  | 1.838032  | -1.31378  | -2.14942  |
| H  | -0.901248 | 0.047698  | 0.586922  |
| Si | 0.675259  | 0.384465  | -1.206676 |

|                |           |         |         |
|----------------|-----------|---------|---------|
| Frequencies -- | -405.9059 | 13.8913 | 15.3554 |
| Frequencies -- | 23.2401   | 29.3736 | 30.9908 |
| Frequencies -- | 42.7704   | 55.8849 | 62.4931 |

|                                              |                             |
|----------------------------------------------|-----------------------------|
| Zero-point correction=                       | 0.244484 (Hartree/Particle) |
| Thermal correction to Energy=                | 0.278070                    |
| Thermal correction to Enthalpy=              | 0.279015                    |
| Thermal correction to Gibbs Free Energy=     | 0.176921                    |
| Sum of electronic and zero-point Energies=   | -2812.013231                |
| Sum of electronic and thermal Energies=      | -2811.979645                |
| Sum of electronic and thermal Enthalpies=    | -2811.978700                |
| Sum of electronic and thermal Free Energies= | -2812.080794                |

## PENT-Si-INT-Bondi.log

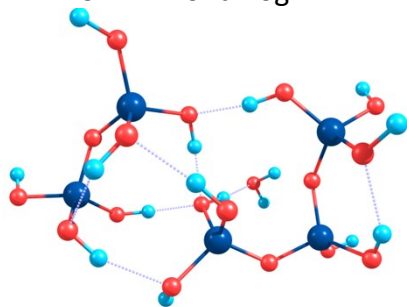

```

39
O      5.512671  -0.95045  0.252311
O      3.427536  -1.011362 -1.374508
O      3.138585  -1.73588  1.25076
O      3.523485  0.84799  0.531358
O      0.976094  1.662263  0.937343
O      2.711681  3.429341  0.15605
O      1.981702  1.431543 -1.569735
O      -1.620952 -2.107534 -0.428448
O      -2.74635  0.104677  0.575211
O      -3.752928 -2.381877  1.014726
O      -4.012374 -1.213689 -1.413244
O      -1.591157  2.547083  0.41578
O      -3.183792  1.470967 -1.602155
O      -4.227772  2.401816  0.643591
H      3.31411   3.78221  -0.513224
H      2.172418 -1.583418  1.319499
H      2.564106  0.714191 -1.892282
H      -4.63546  -2.127163  1.317691
H      -3.913013 -0.332249 -1.823134
H      -3.57068  2.230185 -2.059685
H      -4.101676  2.823799  1.504398
H      5.960674 -0.559394  1.014952
H      2.686595 -1.639388 -1.48742
Si     2.325108  1.848144  0.005367
Si     -3.064302 -1.382895 -0.086899
H      0.78532   0.711935  1.10737
H      -1.900125 -0.278848  2.411035
Si     3.889259 -0.73539  0.192256
Si     -2.898554  1.660287  0.01956
H      -0.70035  2.143099  0.488798
O      -1.247805 -0.847034  2.857573
O      -0.295733 -0.134738 -1.565497
H      0.448795  0.500259 -1.639846
O      0.948978  -2.467738 -1.278752
H      1.175877  -3.246479 -0.748327
O      0.460034  -1.034857  0.919621
H      -0.192645 -1.064784  1.692871
H      -1.735689 -1.658405  3.064892
Si     -0.135331 -1.425842 -0.582675
    
```

```

Frequencies -- 24.9448    38.4501    40.9426
Frequencies -- 50.5097    57.3970    65.1214
Frequencies -- 72.4298    89.4894    92.4663
    
```

```

Zero-point correction=      0.249923 (Hartree/Particle)
Thermal correction to Energy= 0.282899
Thermal correction to Enthalpy= 0.283843
Thermal correction to Gibbs Free Energy= 0.187332
Sum of electronic and zero-point Energies= -2812.072998
Sum of electronic and thermal Energies= -2812.040022
Sum of electronic and thermal Enthalpies= -2812.039077
Sum of electronic and thermal Free Energies= -2812.135588
    
```

## PENT-Si-TS2-Bondi4.log

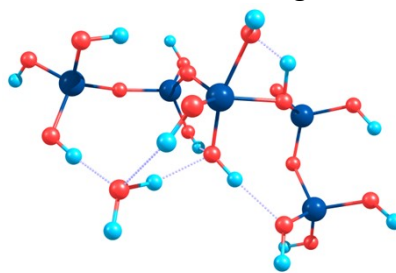

```

39
O      3.980728  0.054855  1.380214
O      4.025861  2.011151 -0.549688
O      5.831908  0.066866 -0.491651
O      3.286565  -0.529014 -1.152627
O      0.711573  -0.513993 -2.077012
O      1.843521  -2.774224 -1.387955
O      1.608176  2.935313  0.205348
H      2.609873  -3.24793  -1.037389
H      6.209838  0.480201 -1.279644
H      1.351071  3.826489 -0.070646
H      3.172437  -0.461432  1.521487
H      3.141188  2.389906 -0.315659
Si     1.777594  -1.172553 -1.022726
H      0.166655  0.153619 -1.602578
Si     4.251449  0.429794 -0.203873
O      -1.558697 -0.713125  1.293918
O      -2.962798 -0.227005 -0.93311
O      -3.897202 -1.993941  0.890653
O      -1.682206 -2.594147 -0.543973
O      -4.510101  1.702094 -2.056596
O      -5.026062  0.717086  0.371772
O      -2.743603  2.207167 -0.00876
H      -4.586322 -1.319146  1.021277
H      -2.072681 -3.061302 -1.29606
H      -5.351792  1.393015  0.981983
H      -2.915685  3.156125 -0.082099
Si     -2.568214 -1.406408  0.137222
Si     -3.829588  1.151075 -0.674028
H      -3.902356  1.944767 -2.769862
O      1.294805  -0.926237  0.543393
O      0.672144  1.250287  2.303985
H      0.898426  2.058813  1.806731
O      -0.245726  0.981133 -0.069386
H      -1.081993  1.485933 -0.000181
Si     0.157467  0.016157  1.314523
O      0.051823  -1.099185  2.752863
H      0.109918  -0.621759  3.593315
H      -1.173785 -1.197088  2.223867
H      0.937606  2.326241 -0.181296
    
```

```

Frequencies -- -877.0619    20.5845    23.8283
Frequencies -- 31.5076    40.1434    51.6285
Frequencies -- 53.6438    61.2818    82.4871
    
```

```

Zero-point correction=      0.246136 (Hartree/Particle)
Thermal correction to Energy= 0.279027
Thermal correction to Enthalpy= 0.279971
Thermal correction to Gibbs Free Energy= 0.182185
Sum of electronic and zero-point Energies= -2812.015823
Sum of electronic and thermal Energies= -2811.982931
Sum of electronic and thermal Enthalpies= -2811.981987
Sum of electronic and thermal Free Energies= -2812.079773
    
```

PENT-Si-PRD-Bondi.log

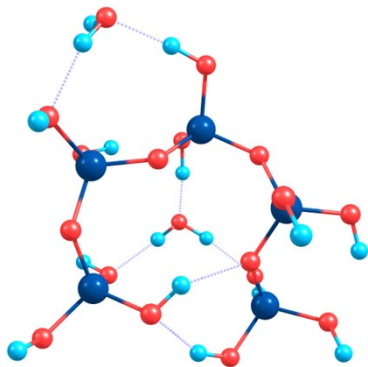

```

39
O      -0.162922  2.743949  1.226975
O      -0.528763  4.415668  -0.819845
O      0.86155   2.147087  -1.159945
O      -1.824748  2.056907  -0.80509
O      -1.501287  -0.562363  -0.45235
O      -3.009617  0.814903  1.314556
O      -3.935103  0.467508  -1.127868
O      0.319135  -2.42769   0.10365
O      1.928481  -0.332092  -0.441528
O      0.827946  -1.810671  -2.399387
O      2.782523  -2.865824  -0.772902
O      3.11711   -0.052459  1.874177
O      4.619134  -0.605298  -0.240563
O      3.453726  1.840419  -0.115811
H      -2.57933   0.156926  1.891409
H      0.904897  1.172691  -1.130607
H      -3.851492  0.565085  -2.087375
H      1.401857  -1.459474  -3.094388
H      3.637584  -2.407217  -0.699994
H      5.008229  -0.32411  -1.081534
H      2.624906  2.238275  -0.452279
H      -0.876418  3.093968  1.781378
H      -0.853806  4.59995   -1.71246
Si     -2.549194  0.688997  -0.254116
Si     1.486067  -1.866185  -0.896271
H      1.400078  0.176369  2.512728
Si     -0.430002  2.83515   -0.403169
Si     3.304124  0.257431  0.262674
H      3.806722  0.277192  2.468274
O      0.476224  0.409223  2.730359
O      -1.259127  -1.414473  2.074242
O      -2.243163  -3.089926  0.213816
H      -3.175933  -2.782447  0.053126
O      -4.709228  -2.115858  -0.197781
H      -4.591803  -1.270887  -0.675345
H      -0.551641  -0.750605  2.352094
H      0.282891  1.189158  2.174206
H      -5.04247  -1.845125  0.670478
Si     -1.185225  -1.885524  0.504643

Frequencies -- 26.8733    27.9839    40.7045
Frequencies -- 44.4592    46.4420    57.2100
Frequencies -- 61.9579    80.5306    86.6182

Zero-point correction=      0.250245 (Hartree/Particle)
Thermal correction to Energy=      0.283530
Thermal correction to Enthalpy=     0.284474
Thermal correction to Gibbs Free Energy=  0.186739
Sum of electronic and zero-point Energies= -2812.078640
Sum of electronic and thermal Energies= -2812.045355
Sum of electronic and thermal Enthalpies= -2812.044411
Sum of electronic and thermal Free Energies= -2812.142145
    
```

## Neutral 4

PENT-4-TS-fix3-Bondi3.log

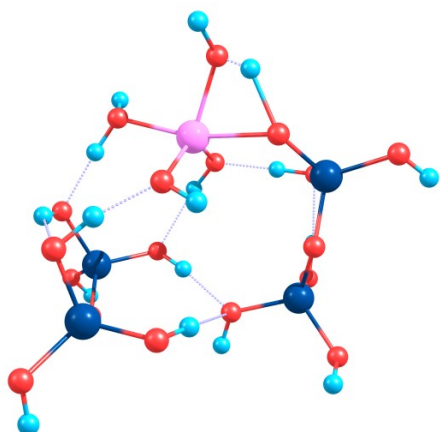

|    |           |           |           |
|----|-----------|-----------|-----------|
| 40 |           |           |           |
| O  | 2.930734  | 1.672643  | 0.751902  |
| O  | 3.682395  | 0.101591  | 2.72007   |
| O  | 1.117902  | -0.022852 | 1.906762  |
| O  | 3.033769  | -0.969722 | 0.285243  |
| O  | 1.533515  | -1.759707 | -1.798444 |
| O  | 2.838906  | 0.654289  | -1.847808 |
| O  | 4.218266  | -1.55295  | -2.088787 |
| O  | -2.374075 | 1.441541  | -1.097672 |
| O  | -2.366471 | -1.157391 | -0.635682 |
| O  | -4.691603 | 0.142779  | -1.177101 |
| O  | -3.42591  | 0.465996  | 1.218451  |
| O  | -0.139048 | -2.04909  | 0.452331  |
| O  | -2.47599  | -2.104743 | 1.898326  |
| O  | -2.127787 | -3.821398 | -0.054377 |
| H  | 1.899462  | 1.005287  | -1.780756 |
| H  | 0.620901  | -0.692494 | 1.387103  |
| H  | 4.461223  | -2.444626 | -1.804462 |
| H  | -5.279678 | -0.572757 | -0.899688 |
| H  | -2.589922 | 0.935443  | 1.520021  |
| H  | -2.934954 | -1.244608 | 1.984458  |
| H  | -1.678408 | -4.128285 | -0.854093 |
| H  | 3.193913  | 1.583442  | -0.189739 |
| H  | 3.465334  | -0.569608 | 3.382036  |
| Si | 2.881259  | -0.923694 | -1.372412 |
| Si | -3.24329  | 0.240025  | -0.411309 |
| H  | 0.861413  | -1.828927 | -1.090662 |
| H  | 0.675485  | 3.875533  | 1.00894   |
| Si | 2.681792  | 0.165673  | 1.423842  |
| Si | -1.805293 | -2.283255 | 0.415843  |
| H  | 0.350952  | -2.78649  | 0.851148  |
| Al | -0.659803 | 2.170829  | -0.241702 |
| O  | -1.098662 | 1.638281  | 1.386618  |
| H  | -0.371399 | 1.208831  | 1.866368  |
| O  | 0.857852  | 3.26922   | 0.274004  |
| O  | -1.734753 | 3.600745  | -0.720285 |
| H  | -1.455664 | 4.190013  | -1.434865 |
| O  | 0.354778  | 1.266249  | -1.375061 |
| H  | -0.149974 | 0.579752  | -1.831111 |
| H  | -2.426232 | 2.628521  | -1.075899 |
| H  | 1.661875  | 2.733854  | 0.531933  |

|                |            |         |         |
|----------------|------------|---------|---------|
| Frequencies -- | -1057.8772 | 38.5750 | 40.6676 |
| Frequencies -- | 45.3048    | 46.4108 | 57.7779 |
| Frequencies -- | 60.1246    | 81.4158 | 98.4860 |

Zero-point correction= 0.256988 (Hartree/Particle)  
 Thermal correction to Energy= 0.289186  
 Thermal correction to Enthalpy= 0.290130  
 Thermal correction to Gibbs Free Energy= 0.196226  
 Sum of electronic and zero-point Energies= -2765.617589  
 Sum of electronic and thermal Energies= -2765.585392  
 Sum of electronic and thermal Enthalpies= -2765.584447  
 Sum of electronic and thermal Free Energies= -2765.678351

## PENT-4-INT-Bondi.log

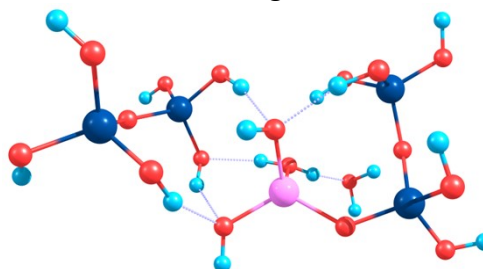

|    |           |           |           |
|----|-----------|-----------|-----------|
| 40 |           |           |           |
| O  | -3.958603 | -0.878137 | 2.311422  |
| O  | -2.648896 | -2.01205  | 0.404835  |
| O  | -5.395501 | -1.770292 | 0.239583  |
| O  | -3.860805 | 0.350767  | -0.149818 |
| O  | -2.031598 | 1.141568  | -1.909184 |
| O  | -3.496219 | 3.00339   | -0.601297 |
| O  | -1.676454 | 1.738766  | 0.736246  |
| O  | 1.880431  | -1.651727 | -1.056461 |
| O  | 3.420878  | 0.261956  | 0.022493  |
| O  | 4.485943  | -1.839494 | -1.312858 |
| O  | 3.431758  | -2.199503 | 1.135039  |
| O  | 1.924573  | 2.379709  | 0.751555  |
| O  | 1.990923  | 0.106326  | 2.290847  |
| O  | 4.142119  | 1.725385  | 2.106646  |
| H  | -4.179511 | 3.073357  | -1.281464 |
| H  | -5.705687 | -1.536814 | -0.646251 |
| H  | -1.061657 | 0.977444  | 0.8653    |
| H  | 5.384958  | -1.741635 | -0.970696 |
| H  | 2.961858  | -1.757017 | 1.863181  |
| H  | 1.113206  | -0.14691  | 1.90757   |
| H  | 3.949642  | 2.251824  | 2.894794  |
| H  | -4.741187 | -0.447123 | 2.680079  |
| H  | -2.233484 | -1.951322 | -0.488553 |
| Si | -2.767109 | 1.54078   | -0.466162 |
| Si | 3.287647  | -1.379099 | -0.288775 |
| H  | -2.011726 | 0.177045  | -2.088589 |
| H  | 3.368112  | 1.253203  | -1.719191 |
| H  | -3.968368 | -1.07127  | 0.679535  |
| Si | 2.837514  | 1.131386  | 1.313073  |
| H  | 1.195414  | 2.139706  | 0.158556  |
| Al | 0.343509  | -0.86108  | -0.907167 |
| O  | 2.833544  | 1.505041  | -2.496983 |
| O  | 0.612804  | 0.861071  | -1.531215 |
| H  | -0.209287 | 1.296039  | -1.859032 |
| O  | -0.151105 | -0.522633 | 0.765112  |
| H  | -0.804261 | -1.148452 | 1.121105  |
| O  | -1.072839 | -1.494457 | -1.73273  |
| H  | -0.994527 | -2.056471 | -2.513614 |
| H  | 1.474482  | 1.148087  | -2.036198 |
| H  | 3.124836  | 0.912453  | -3.207067 |

|                |         |         |         |
|----------------|---------|---------|---------|
| Frequencies -- | 27.3024 | 28.0682 | 31.9175 |
| Frequencies -- | 46.7162 | 56.2288 | 62.2464 |
| Frequencies -- | 70.1664 | 75.2842 | 87.2025 |

Zero-point correction= 0.259247 (Hartree/Particle)  
 Thermal correction to Energy= 0.293315  
 Thermal correction to Enthalpy= 0.294259  
 Thermal correction to Gibbs Free Energy= 0.194593  
 Sum of electronic and zero-point Energies= -2765.639096  
 Sum of electronic and thermal Energies= -2765.605028  
 Sum of electronic and thermal Enthalpies= -2765.604083  
 Sum of electronic and thermal Free Energies= -2765.703749



PENT-4-TS2-Bondi10.log

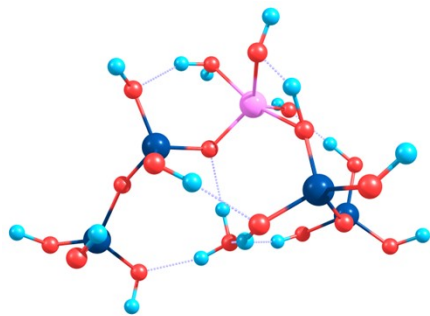

|    |           |           |           |
|----|-----------|-----------|-----------|
| 40 |           |           |           |
| O  | 3.929931  | 0.024353  | -1.269952 |
| O  | 2.259036  | -2.087958 | -1.766211 |
| O  | 4.639154  | -2.478517 | -0.709155 |
| O  | 2.718098  | -1.321871 | 0.765749  |
| O  | 1.7913    | 1.164233  | 0.894085  |
| O  | 0.311446  | -0.938583 | 1.87236   |
| O  | 2.40106   | -0.120767 | 3.195643  |
| O  | -0.564155 | 0.868613  | -0.646629 |
| O  | -3.105452 | 0.053054  | -0.688472 |
| O  | -2.505139 | 2.612392  | -0.143561 |
| O  | -1.966478 | 0.647645  | 1.669077  |
| O  | -2.891112 | -2.546524 | -0.879415 |
| O  | -3.967787 | -1.414218 | 1.403682  |
| O  | -5.323761 | -1.509949 | -0.921157 |
| H  | 0.049279  | -1.474509 | 1.0814    |
| H  | 5.436477  | -2.13349  | -0.285338 |
| H  | 3.147168  | 0.487509  | 3.28805   |
| H  | -2.77153  | 3.084693  | 0.657732  |
| H  | -1.144453 | 0.158604  | 1.908725  |
| H  | -3.336971 | -0.813092 | 1.843728  |
| H  | -6.032321 | -1.000171 | -0.504129 |
| H  | 3.248997  | 0.724764  | -1.461257 |
| H  | 1.354023  | -2.164959 | -1.386582 |
| Si | 1.819901  | -0.287887 | 1.666563  |
| Si | -2.014743 | 1.036742  | 0.06139   |
| H  | -0.309057 | -0.933772 | -0.881335 |
| Si | 3.36955   | -1.423884 | -0.758609 |
| Si | -3.841841 | -1.350301 | -0.23392  |
| H  | -3.151498 | -3.454484 | -0.668601 |
| Al | 0.774443  | 2.038266  | -0.563809 |
| O  | -0.192572 | -1.871654 | -0.613323 |
| O  | 2.085116  | 1.892353  | -1.719666 |
| H  | 1.949464  | 2.177004  | -2.631263 |
| O  | 0.736934  | 3.163647  | 0.913041  |
| H  | 1.147761  | 4.037805  | 0.863448  |
| H  | -1.054477 | -2.294709 | -0.810594 |
| H  | 1.43754   | 2.214116  | 1.312249  |
| O  | -0.252856 | 3.427356  | -1.556149 |
| H  | -1.164214 | 3.429686  | -1.178745 |
| H  | -0.356192 | 3.303295  | -2.513469 |

|                |            |         |         |
|----------------|------------|---------|---------|
| Frequencies -- | -1040.2364 | 29.7363 | 35.0527 |
| Frequencies -- | 42.7669    | 44.2258 | 65.1007 |
| Frequencies -- | 76.1679    | 84.9571 | 93.5537 |

|                                              |                             |
|----------------------------------------------|-----------------------------|
| Zero-point correction=                       | 0.256835 (Hartree/Particle) |
| Thermal correction to Energy=                | 0.289738                    |
| Thermal correction to Enthalpy=              | 0.290682                    |
| Thermal correction to Gibbs Free Energy=     | 0.195069                    |
| Sum of electronic and zero-point Energies=   | -2765.628498                |
| Sum of electronic and thermal Energies=      | -2765.595595                |
| Sum of electronic and thermal Enthalpies=    | -2765.594650                |
| Sum of electronic and thermal Free Energies= | -2765.690263                |

PENT-4-PRD-Bondi2.log

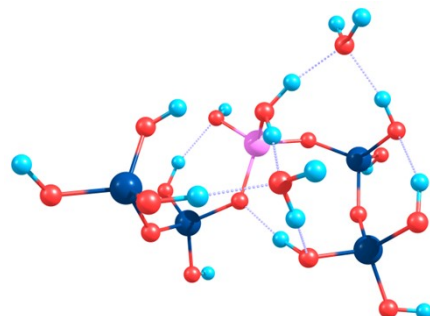

|    |           |           |           |
|----|-----------|-----------|-----------|
| 40 |           |           |           |
| O  | -2.996919 | -1.689063 | -1.735789 |
| O  | -2.839975 | -3.49974  | 0.263656  |
| O  | -0.712143 | -2.084934 | -0.325949 |
| O  | -2.808932 | -0.83155  | 0.810831  |
| O  | -1.742645 | 1.634167  | 0.962854  |
| O  | -3.527407 | 0.986317  | -0.984004 |
| O  | -4.368211 | 1.246001  | 1.516842  |
| O  | 0.604533  | -0.14723  | 0.992825  |
| O  | 3.107313  | -0.981347 | 0.437874  |
| O  | 1.994448  | -1.882249 | 2.574664  |
| O  | 2.640038  | 0.751301  | 2.499935  |
| O  | 3.072006  | -0.951974 | -2.278088 |
| O  | 3.092477  | 1.383137  | -0.863495 |
| O  | 5.240707  | -0.243446 | -0.864275 |
| H  | -3.044798 | 1.694465  | -1.465173 |
| H  | -0.239028 | -1.461886 | 0.282382  |
| H  | -4.262506 | 1.117638  | 2.469574  |
| H  | 1.436008  | -1.802735 | 3.359542  |
| H  | 2.191953  | 1.588033  | 2.238282  |
| H  | 2.311656  | 1.607751  | -1.390633 |
| H  | 5.686428  | 0.257306  | -1.561004 |
| H  | -3.264824 | -0.750376 | -1.803928 |
| H  | -3.790031 | -3.67212  | 0.207222  |
| Si | -3.07861  | 0.792654  | 0.597344  |
| Si | 2.067842  | -0.5293   | 1.63837   |
| H  | -0.066287 | -1.396217 | -1.782644 |
| H  | -2.365168 | -2.013739 | -0.250777 |
| Si | 3.597131  | -0.192896 | -0.924167 |
| H  | 2.099     | -0.937525 | -2.420596 |
| Al | -0.040804 | 1.457571  | 0.637734  |
| O  | 0.33949   | -0.740751 | -2.404961 |
| O  | 0.129573  | 1.535214  | -1.215062 |
| H  | -0.556684 | 2.107906  | -1.673098 |
| O  | 0.973187  | 2.678564  | 1.367552  |
| H  | 0.551515  | 3.285212  | 1.988777  |
| O  | -1.90782  | 2.851035  | -2.204351 |
| H  | -1.95949  | 2.920238  | -3.170389 |
| H  | 0.168126  | 0.647313  | -1.716234 |
| H  | -0.144099 | -0.812008 | -3.241618 |
| H  | -2.000956 | 3.75691   | -1.870251 |

|                |         |         |         |
|----------------|---------|---------|---------|
| Frequencies -- | 23.7519 | 27.1700 | 35.9852 |
| Frequencies -- | 41.1256 | 56.6500 | 64.5113 |
| Frequencies -- | 67.7479 | 73.3558 | 92.1374 |

|                                              |                             |
|----------------------------------------------|-----------------------------|
| Zero-point correction=                       | 0.260828 (Hartree/Particle) |
| Thermal correction to Energy=                | 0.294486                    |
| Thermal correction to Enthalpy=              | 0.295430                    |
| Thermal correction to Gibbs Free Energy=     | 0.197175                    |
| Sum of electronic and zero-point Energies=   | -2765.653963                |
| Sum of electronic and thermal Energies=      | -2765.620305                |
| Sum of electronic and thermal Enthalpies=    | -2765.619361                |
| Sum of electronic and thermal Free Energies= | -2765.717615                |

PENT-4-RCT-Bondi.log

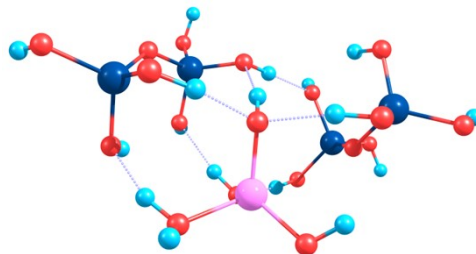

```

40
O      -2.701562  0.317435  -2.422307
O      -4.489694  -1.495936  -1.478283
O      -2.006046  -2.195648  -1.541722
O      -2.688316  -0.274252  0.18883
O      -2.085033  1.191611  2.335529
O      -1.99455  2.188788  -0.258921
O      -4.306467  1.816213  0.951513
O      2.892593  -1.654873  -1.375236
O      3.06872  1.040359  -0.908107
O      5.233129  -0.571413  -1.088869
O      3.523695  -0.7003  1.060926
O      0.490091  1.410467  -1.006281
O      1.872263  1.740396  1.338146
O      2.133572  3.57572  -0.557579
H      -2.12709  3.144665  -0.179091
H      -1.059584  -1.990707  -1.341384
H      -4.852516  1.459188  1.665515
H      5.866424  0.000878  -0.634664
H      3.320904  0.103142  1.571701
H      1.741725  2.519375  1.897432
H      1.993217  3.900366  -1.458396
H      -2.390177  1.148654  -2.026867
H      -5.195772  -0.836532  -1.509812
Si     -2.777119  1.2223  0.866907
Si     3.676036  -0.461177  -0.594968
H      -1.270557  0.603193  2.371889
H      1.919507  -1.668734  -1.181412
Si     -2.969257  -0.887449  -1.326109
Si     1.86465  1.980582  -0.305776
H      -0.372063  1.793161  -0.716947
Al     0.102416  -1.708054  1.179642
O      0.062566  -0.297186  2.221467
H      0.719139  0.396362  2.024696
O      0.356667  -1.331779  -0.540162
O      1.739317  -2.515719  1.684907
H      1.954287  -3.395739  1.33691
O      -1.078672  -2.944015  1.449311
H      -1.697103  -3.030025  0.711052
H      2.531209  -1.917029  1.528755
H      0.288518  -0.384055  -0.780785

```

```

Frequencies -- 18.4649  35.5017  41.3036
Frequencies -- 48.0029  56.6064  62.4830
Frequencies -- 63.9582  71.7643  79.2418

```

```

Zero-point correction= 0.258888 (Hartree/Particle)
Thermal correction to Energy= 0.292929
Thermal correction to Enthalpy= 0.293873
Thermal correction to Gibbs Free Energy= 0.194088
Sum of electronic and zero-point Energies= -2765.633674
Sum of electronic and thermal Energies= -2765.599633
Sum of electronic and thermal Enthalpies= -2765.598689
Sum of electronic and thermal Free Energies= -2765.698474

```

Neutral 5

PENT-5-RCT-Bondi.log

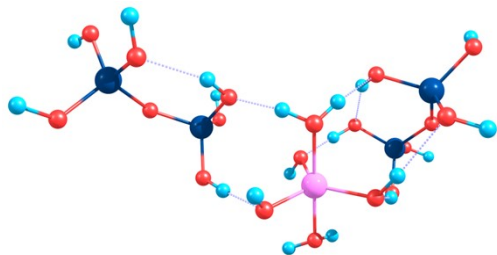

43

|    |           |           |           |
|----|-----------|-----------|-----------|
| O  | -2.176923 | 2.014839  | 0.422835  |
| O  | -4.534601 | 3.37      | -0.095521 |
| O  | -3.35611  | 1.810386  | -1.88492  |
| O  | -4.520117 | 0.711418  | 0.35439   |
| O  | -3.826131 | -1.858446 | -0.073344 |
| O  | -2.580945 | -0.335815 | 1.851475  |
| O  | -5.065421 | -1.163369 | 2.224415  |
| O  | 2.6311    | -1.939101 | -0.204988 |
| O  | 4.513977  | -0.312146 | 0.812477  |
| O  | 2.355191  | -0.995106 | 2.248613  |
| O  | 2.155659  | 0.739293  | 0.142547  |
| O  | 6.508348  | -0.133287 | -0.850908 |
| O  | 4.564849  | 1.814933  | -0.766591 |
| O  | 6.325499  | 1.697979  | 1.195011  |
| H  | -1.752805 | -0.74075  | 1.429529  |
| H  | -4.115072 | 1.859358  | -2.48329  |
| H  | -5.972704 | -1.289489 | 1.914066  |
| H  | 2.581019  | -0.345747 | 2.928737  |
| H  | 2.805345  | 1.333616  | -0.28939  |
| H  | 4.756781  | 2.75614   | -0.651064 |
| H  | 6.989305  | 1.243153  | 1.732158  |
| H  | -2.134493 | 1.38446   | 1.175673  |
| H  | -4.927061 | 3.513956  | 0.777077  |
| Si | -3.986622 | -0.698017 | 1.07441   |
| Si | 2.891387  | -0.63764  | 0.735399  |
| H  | -3.344819 | -1.50794  | -0.881785 |
| H  | 1.988695  | -1.804003 | -0.962434 |
| Si | -3.684303 | 1.979007  | -0.275513 |
| Si | 5.519576  | 0.769855  | 0.102831  |
| H  | 7.178211  | 0.362401  | -1.342453 |
| Al | -0.642871 | -1.126977 | -1.204063 |
| O  | -2.246526 | -0.865396 | -1.918996 |
| H  | -2.513089 | 0.046821  | -2.118943 |
| O  | 0.85047   | -1.499545 | -2.10197  |
| O  | -0.212092 | 0.793878  | -1.097939 |
| H  | -0.868637 | 1.339738  | -0.603296 |
| O  | -0.52193  | -1.248324 | 0.585492  |
| H  | -0.363916 | -2.141965 | 0.914758  |
| O  | -1.10505  | -3.122971 | -1.31641  |
| H  | -0.402702 | -3.753311 | -1.092867 |
| H  | -1.870259 | -3.359661 | -0.766368 |
| H  | 0.649874  | 0.869312  | -0.607015 |
| H  | 1.239129  | -0.734013 | -2.545409 |

|                |         |         |         |
|----------------|---------|---------|---------|
| Frequencies -- | 11.8595 | 20.7377 | 24.8581 |
| Frequencies -- | 33.6098 | 34.7896 | 42.8809 |
| Frequencies -- | 57.1240 | 62.7128 | 77.9601 |

|                                              |                             |
|----------------------------------------------|-----------------------------|
| Zero-point correction=                       | 0.284787 (Hartree/Particle) |
| Thermal correction to Energy=                | 0.320839                    |
| Thermal correction to Enthalpy=              | 0.321784                    |
| Thermal correction to Gibbs Free Energy=     | 0.216409                    |
| Sum of electronic and zero-point Energies=   | -2842.050434                |
| Sum of electronic and thermal Energies=      | -2842.014381                |
| Sum of electronic and thermal Enthalpies=    | -2842.013437                |
| Sum of electronic and thermal Free Energies= | -2842.118812                |

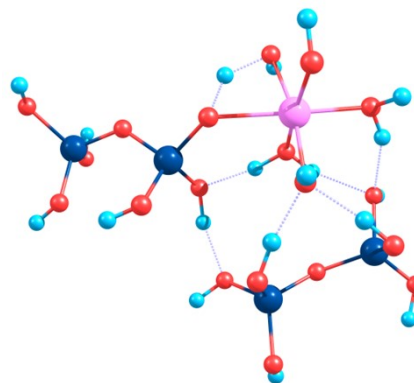

43

|    |           |           |           |
|----|-----------|-----------|-----------|
| O  | 1.199742  | -1.519142 | 1.668251  |
| O  | 2.275564  | -3.788745 | 0.975963  |
| O  | 0.323599  | -2.760623 | -0.621315 |
| O  | 2.643634  | -1.604988 | -0.642039 |
| O  | 3.473998  | 0.742151  | -1.608248 |
| O  | 3.923341  | 0.197978  | 0.939819  |
| O  | 5.28496   | -1.120725 | -1.006577 |
| O  | 2.436339  | 3.038041  | -0.45042  |
| O  | -3.524172 | 0.539169  | -0.193328 |
| O  | -1.977059 | -0.695071 | 1.656391  |
| O  | -1.197227 | -0.523663 | -0.965414 |
| O  | -5.009135 | -1.073148 | -1.873869 |
| O  | -4.42606  | -1.756971 | 0.624375  |
| O  | -6.182188 | 0.323788  | 0.052595  |
| H  | 3.045047  | 0.607054  | 1.206731  |
| H  | 5.427561  | -2.05138  | -0.785608 |
| H  | -2.697634 | -1.349172 | 1.641788  |
| H  | -0.775964 | -1.399075 | -0.799461 |
| H  | -4.96298  | -2.556482 | 0.542814  |
| H  | 1.214243  | -0.52097  | 1.547834  |
| H  | 2.503158  | -4.462122 | 0.320275  |
| Si | 3.850172  | -0.489191 | -0.531496 |
| Si | -1.969334 | 0.239722  | 0.301262  |
| H  | 3.718656  | 0.616837  | -2.536858 |
| H  | 3.020812  | 2.386874  | -0.897124 |
| Si | 1.619081  | -2.403919 | 0.375168  |
| Si | -4.805642 | -0.479117 | -0.356112 |
| H  | -5.418181 | -0.469213 | -2.508811 |
| Al | 0.713921  | 2.38035   | 0.34296   |
| O  | -0.384985 | 3.530508  | -0.801589 |
| O  | 1.483949  | 1.052375  | 1.387817  |
| H  | 1.434362  | 1.361561  | 2.304123  |
| O  | -1.230011 | 1.657575  | 0.601462  |
| O  | 0.767391  | 3.586912  | 1.661463  |
| H  | 0.365019  | 4.420926  | 1.391014  |
| H  | -0.301438 | 3.248292  | -1.725665 |
| H  | 2.963481  | 3.485261  | 0.228534  |
| H  | -1.293119 | 2.693533  | -0.305065 |
| O  | 0.783423  | 1.191975  | -1.253971 |
| H  | 1.647036  | 0.843246  | -1.552245 |
| H  | 0.109357  | 0.461871  | -1.271608 |
| H  | -6.090447 | 0.943098  | 0.79025   |
| H  | -0.230628 | -3.488828 | -0.30384  |

|                |            |         |         |
|----------------|------------|---------|---------|
| Frequencies -- | -1564.5968 | 20.7597 | 25.9591 |
| Frequencies -- | 37.5108    | 43.0935 | 60.1080 |
| Frequencies -- | 62.9151    | 69.4520 | 84.4349 |

|                                              |                             |
|----------------------------------------------|-----------------------------|
| Zero-point correction=                       | 0.279840 (Hartree/Particle) |
| Thermal correction to Energy=                | 0.315333                    |
| Thermal correction to Enthalpy=              | 0.316277                    |
| Thermal correction to Gibbs Free Energy=     | 0.214819                    |
| Sum of electronic and zero-point Energies=   | -2842.026033                |
| Sum of electronic and thermal Energies=      | -2841.990540                |
| Sum of electronic and thermal Enthalpies=    | -2841.989596                |
| Sum of electronic and thermal Free Energies= | -2842.091054                |

PENT-5-TS-Bondi4.log

PENT-5-INT-Bondi2.log

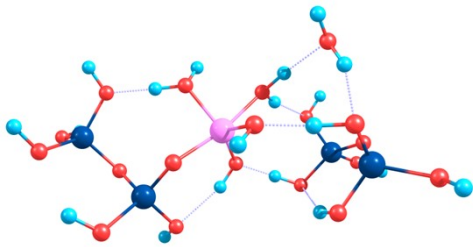

43

|    |           |           |           |
|----|-----------|-----------|-----------|
| O  | -2.910502 | -2.159078 | -0.110533 |
| O  | -3.064504 | -0.506742 | -2.238079 |
| O  | -5.315799 | -1.62551  | -1.317255 |
| O  | -4.168918 | 0.207227  | 0.149688  |
| O  | -2.82299  | 2.104303  | 1.555433  |
| O  | -4.797374 | 0.69179   | 2.710781  |
| O  | -2.407498 | -0.445734 | 2.084231  |
| O  | 1.77358   | -0.777607 | -0.686554 |
| O  | 3.862888  | -0.273156 | 0.958821  |
| O  | 3.704859  | -2.656882 | -0.271762 |
| O  | 1.94181   | -2.003287 | 1.65488   |
| O  | 6.180634  | 1.139879  | 1.088654  |
| O  | 5.646043  | -0.479868 | -0.958898 |
| O  | 4.145025  | 1.80968   | -0.613497 |
| H  | -5.579468 | 0.175498  | 2.47213   |
| H  | -5.316622 | -2.20132  | -2.093863 |
| H  | -1.459637 | -0.231923 | 1.747389  |
| H  | 4.479449  | -2.331587 | -0.758877 |
| H  | 2.448697  | -2.133405 | 2.468069  |
| H  | 6.060525  | -0.1135   | -1.751683 |
| H  | 4.63688   | 2.418548  | -1.183134 |
| H  | -2.630541 | -1.852515 | 0.77443   |
| H  | -2.046258 | -0.474154 | -2.137578 |
| Si | -3.56187  | 0.615587  | 1.628814  |
| Si | 2.802136  | -1.421218 | 0.357955  |
| H  | -3.380641 | 2.835735  | 1.251688  |
| H  | -3.053862 | 1.284364  | -2.42498  |
| Si | -3.83649  | -1.037252 | -0.890884 |
| Si | 4.982338  | 0.572021  | 0.122763  |
| H  | 5.915563  | 1.786225  | 1.758216  |
| Al | 0.344783  | 0.35198   | -0.532497 |
| O  | -0.976421 | 1.824997  | -0.468135 |
| H  | -1.618045 | 1.990048  | -1.224475 |
| O  | -2.759863 | 2.219706  | -2.34631  |
| O  | 1.508728  | 1.821997  | -0.91569  |
| H  | 1.177692  | 2.709162  | -0.715875 |
| O  | -0.076771 | 0.024501  | 1.183404  |
| H  | 0.478473  | -0.678577 | 1.562072  |
| O  | -0.539771 | -0.301541 | -1.951399 |
| H  | -0.075603 | -1.073238 | -2.301502 |
| H  | 2.497261  | 1.791038  | -0.809491 |
| H  | -2.325055 | 2.410689  | -3.190175 |
| H  | -1.481807 | 1.987871  | 0.356785  |

  

|                |         |         |         |
|----------------|---------|---------|---------|
| Frequencies -- | 11.9011 | 24.4991 | 36.7782 |
| Frequencies -- | 44.1229 | 50.4136 | 52.2444 |
| Frequencies -- | 61.4198 | 76.8058 | 86.6521 |

Zero-point correction= 0.283881 (Hartree/Particle)  
 Thermal correction to Energy= 0.320409  
 Thermal correction to Enthalpy= 0.321353  
 Thermal correction to Gibbs Free Energy= 0.215806  
 Sum of electronic and zero-point Energies= -2842.065171  
 Sum of electronic and thermal Energies= -2842.028643  
 Sum of electronic and thermal Enthalpies= -2842.027699  
 Sum of electronic and thermal Free Energies= -2842.133246

PENT-5-TS2-Bondi8.log

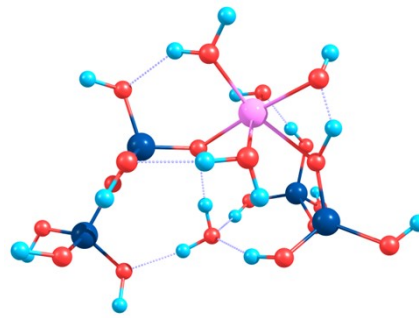

43

|    |           |           |           |
|----|-----------|-----------|-----------|
| O  | 4.238234  | -2.710155 | -1.424271 |
| O  | 3.333306  | -0.250291 | -1.854222 |
| O  | 1.5595    | -2.300715 | -1.647263 |
| O  | 2.949791  | -1.589269 | 0.536159  |
| O  | 2.321081  | 0.955151  | 0.661433  |
| O  | 1.103875  | -0.7248   | 2.345189  |
| O  | 3.626869  | -0.1949   | 2.780089  |
| O  | -0.620465 | 0.744605  | -0.627422 |
| O  | -3.039219 | -0.435683 | -0.806748 |
| O  | -2.593575 | 2.097972  | -1.697403 |
| O  | -2.646947 | 1.570421  | 0.955877  |
| O  | -2.892225 | -2.707933 | 0.512945  |
| O  | -4.334604 | -0.714917 | 1.544992  |
| O  | -5.194557 | -1.908688 | -0.786969 |
| H  | 0.493619  | -1.235295 | 1.753469  |
| H  | 0.857121  | -2.303708 | -0.954738 |
| H  | 4.465591  | 0.205185  | 2.511783  |
| H  | -3.492528 | 2.455869  | -1.665693 |
| H  | -3.202211 | 0.967856  | 1.484323  |
| H  | -5.227373 | -0.341432 | 1.57343   |
| H  | -5.714081 | -2.660867 | -0.470271 |
| H  | 4.485385  | -2.781469 | -2.355815 |
| H  | 2.644731  | 0.474606  | -1.823382 |
| Si | 2.524319  | -0.384458 | 1.574266  |
| Si | -2.216572 | 0.967719  | -0.537959 |
| H  | -0.422042 | -0.937756 | -0.109086 |
| Si | 2.986913  | -1.670814 | -1.124383 |
| Si | -3.912329 | -1.462642 | 0.128639  |
| H  | -3.078438 | -3.172712 | 1.34152   |
| Al | 0.713043  | 1.994849  | -0.292009 |
| O  | -0.243127 | -1.818352 | 0.300214  |
| O  | 0.012376  | 1.954381  | 1.640056  |
| H  | -0.971994 | 1.924852  | 1.634676  |
| O  | 1.533984  | 1.755709  | -1.889179 |
| H  | 0.908684  | 1.388266  | -2.527955 |
| O  | 1.983905  | 3.237589  | 0.383675  |
| H  | 2.531323  | 3.584909  | -0.334771 |
| H  | 0.284392  | 1.106265  | 2.050901  |
| H  | -1.114992 | -2.259269 | 0.369775  |
| H  | 2.496515  | 2.050719  | 0.75521   |
| O  | -0.50235  | 3.492441  | -0.660883 |
| H  | -1.247014 | 3.337613  | -1.283308 |
| H  | -0.085701 | 4.345518  | -0.851985 |

  

|                |           |         |          |
|----------------|-----------|---------|----------|
| Frequencies -- | -590.4352 | 23.1192 | 26.9842  |
| Frequencies -- | 34.4653   | 44.7270 | 53.4526  |
| Frequencies -- | 66.5102   | 69.2180 | 100.8637 |

Zero-point correction= 0.282816 (Hartree/Particle)  
 Thermal correction to Energy= 0.317670  
 Thermal correction to Enthalpy= 0.318614  
 Thermal correction to Gibbs Free Energy= 0.218868  
 Sum of electronic and zero-point Energies= -2842.045603  
 Sum of electronic and thermal Energies= -2842.010750  
 Sum of electronic and thermal Enthalpies= -2842.009805  
 Sum of electronic and thermal Free Energies= -2842.109552

PENT-5-PRD-Bondi.log

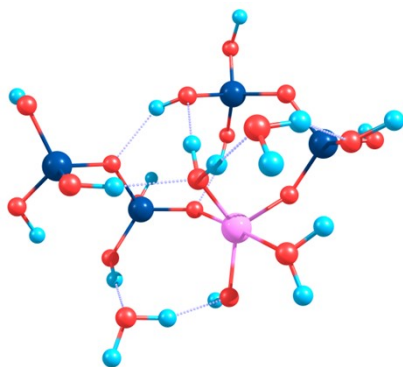

### PENT-6-RCT-Bondi.log

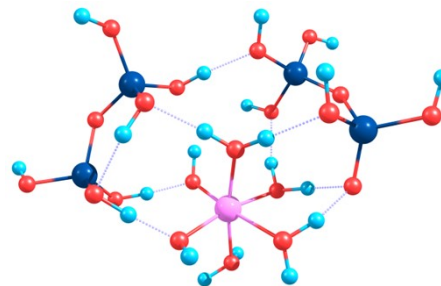

|    |           |           |           |
|----|-----------|-----------|-----------|
| 46 |           |           |           |
| O  | 1.69046   | -1.090572 | 1.767654  |
| O  | 2.419283  | -3.592886 | 0.966837  |
| O  | 1.054477  | -2.039158 | -0.694013 |
| O  | 3.572997  | -1.381753 | -0.119764 |
| O  | 3.725144  | 0.966373  | -1.457988 |
| O  | 3.481188  | 0.908761  | 1.26456   |
| O  | 5.759671  | 0.159097  | 0.131966  |
| O  | -3.306416 | 1.949388  | 0.220931  |
| O  | -3.694052 | -0.719713 | -0.264078 |
| O  | -5.317442 | 0.596687  | 1.381749  |
| O  | -2.685206 | 0.138597  | 2.056702  |
| O  | -1.811128 | -0.973163 | -2.07749  |
| O  | -1.543797 | -2.401181 | 0.135386  |
| O  | -3.493644 | -3.089968 | -1.509179 |
| H  | 2.733409  | 1.592466  | 1.057144  |
| H  | 0.140221  | -2.228952 | -0.385788 |
| H  | 6.228651  | -0.452278 | -0.452056 |
| H  | -5.719454 | -0.263359 | 1.565039  |
| H  | -2.735556 | -0.77807  | 2.364977  |
| H  | -1.78961  | -3.195454 | 0.630064  |
| H  | -4.30341  | -2.884497 | -1.99726  |
| H  | 2.331345  | -0.351502 | 1.909041  |
| H  | 2.951114  | -3.706256 | 1.767187  |
| Si | 4.123521  | 0.198855  | -0.073901 |
| Si | -3.762052 | 0.546118  | 0.823672  |
| H  | 2.709588  | 0.972911  | -1.549455 |
| H  | -2.27054  | 1.770226  | -0.928441 |
| Si | 2.195538  | -2.035355 | 0.487318  |
| Si | -2.668098 | -1.798457 | -0.921044 |
| H  | -1.07631  | -1.452776 | -2.486385 |
| Al | 0.184531  | 1.923089  | -0.289456 |
| O  | 1.161596  | 0.887642  | -1.422757 |
| H  | 0.935061  | -0.054388 | -1.39149  |
| O  | -1.396497 | 1.657917  | -1.440395 |
| O  | -0.339568 | 0.412199  | 0.812934  |
| H  | 0.363767  | -0.154467 | 1.214841  |
| O  | 1.577586  | 2.502472  | 0.748778  |
| H  | 1.271446  | 2.871096  | 1.587134  |
| O  | 0.424297  | 3.56883   | -1.416992 |
| H  | 1.331436  | 3.908577  | -1.369264 |
| O  | -1.084599 | 2.984629  | 0.82575   |
| H  | -1.089075 | 3.925007  | 0.594032  |
| H  | -2.054949 | 2.644479  | 0.715645  |
| H  | -1.149018 | 0.354616  | 1.38132   |
| H  | -1.428965 | 0.752263  | -1.818861 |
| H  | 0.222423  | 3.420352  | -2.353863 |

|                |         |         |         |
|----------------|---------|---------|---------|
| Frequencies -- | 34.2119 | 38.3488 | 53.9537 |
| Frequencies -- | 54.9167 | 60.6202 | 61.6042 |
| Frequencies -- | 71.3585 | 78.8796 | 86.2087 |

|                                              |                             |
|----------------------------------------------|-----------------------------|
| Zero-point correction=                       | 0.310435 (Hartree/Particle) |
| Thermal correction to Energy=                | 0.347623                    |
| Thermal correction to Enthalpy=              | 0.348567                    |
| Thermal correction to Gibbs Free Energy=     | 0.244820                    |
| Sum of electronic and zero-point Energies=   | -2918.490858                |
| Sum of electronic and thermal Energies=      | -2918.453671                |
| Sum of electronic and thermal Enthalpies=    | -2918.452726                |
| Sum of electronic and thermal Free Energies= | -2918.556473                |

|    |           |           |           |
|----|-----------|-----------|-----------|
| 43 |           |           |           |
| O  | 4.708733  | -0.267423 | 0.482541  |
| O  | 3.461981  | -1.832342 | 2.262849  |
| O  | 2.634809  | 0.662858  | 1.984237  |
| O  | 2.17266   | -1.100107 | -0.001054 |
| O  | 0.359861  | 0.188889  | -1.468273 |
| O  | 3.040828  | 0.852893  | -1.626343 |
| O  | 2.206665  | -1.371818 | -2.695308 |
| O  | -2.234404 | 0.82101   | -1.014462 |
| O  | -2.892568 | -1.344266 | 0.422945  |
| O  | -4.857947 | 0.045554  | -0.802536 |
| O  | -3.586818 | 1.159073  | 1.22758   |
| O  | -1.973974 | -3.866889 | 0.162981  |
| O  | -1.173672 | -2.109694 | -1.588466 |
| O  | -0.369785 | -1.774092 | 0.987609  |
| H  | 2.856892  | 1.727734  | -1.179492 |
| H  | 1.717768  | 0.881911  | 1.738317  |
| H  | 1.628967  | -2.146712 | -2.722367 |
| H  | -4.98403  | -0.702437 | -1.402362 |
| H  | -4.478381 | 1.190266  | 1.602514  |
| H  | -0.714412 | -1.25285  | -1.74875  |
| H  | 0.533238  | -1.977828 | 0.67394   |
| H  | 4.584964  | 0.238247  | -0.340842 |
| H  | 3.896676  | -2.626791 | 1.923455  |
| Si | 1.895761  | -0.318403 | -1.463161 |
| Si | -3.375718 | 0.155274  | -0.098117 |
| H  | -1.496238 | 2.430404  | 3.283933  |
| Si | 3.253321  | -0.623026 | 1.1681    |
| Si | -1.607567 | -2.278794 | -0.0189   |
| H  | -2.423048 | -4.104999 | 0.985541  |
| Al | -0.634063 | 1.501536  | -0.664354 |
| O  | -0.096289 | 0.869532  | 1.064358  |
| H  | -0.593745 | 1.195874  | 1.898751  |
| O  | -1.507353 | 1.476895  | 3.111236  |
| O  | -1.511479 | 2.977704  | 0.485883  |
| H  | -1.596741 | 3.794596  | -0.029146 |
| O  | 0.038952  | 2.899024  | -1.5378   |
| H  | 0.467872  | 2.608971  | -2.3547   |
| O  | 2.444606  | 3.105122  | -0.343344 |
| H  | 1.559045  | 3.244099  | -0.764632 |
| H  | -2.409851 | 2.726535  | 0.777901  |
| H  | -2.377605 | 1.310633  | 2.694512  |
| H  | 2.993503  | 3.844779  | -0.640344 |
| H  | -0.161673 | -0.12849  | 1.092408  |

|                |         |         |         |
|----------------|---------|---------|---------|
| Frequencies -- | 25.7238 | 38.6431 | 44.6304 |
| Frequencies -- | 48.7337 | 60.3229 | 66.8359 |
| Frequencies -- | 70.3552 | 80.8982 | 91.8817 |

|                                              |                             |
|----------------------------------------------|-----------------------------|
| Zero-point correction=                       | 0.287006 (Hartree/Particle) |
| Thermal correction to Energy=                | 0.322972                    |
| Thermal correction to Enthalpy=              | 0.323917                    |
| Thermal correction to Gibbs Free Energy=     | 0.222185                    |
| Sum of electronic and zero-point Energies=   | -2842.073643                |
| Sum of electronic and thermal Energies=      | -2842.037676                |
| Sum of electronic and thermal Enthalpies=    | -2842.036732                |
| Sum of electronic and thermal Free Energies= | -2842.138464                |

### Neutral 6

### PENT-6-TS-Bondi.log

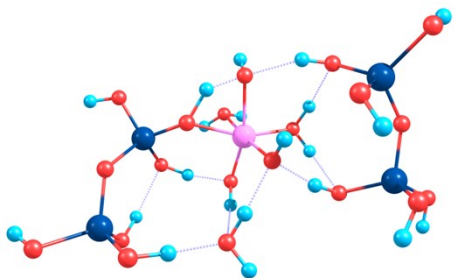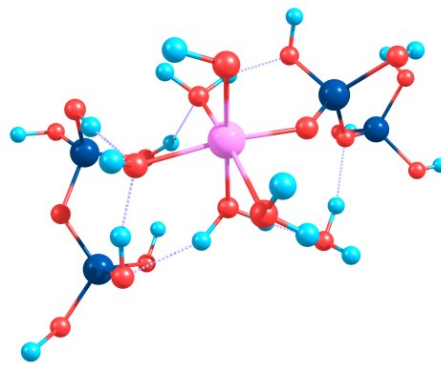

46

|    |           |           |           |
|----|-----------|-----------|-----------|
| O  | 3.796497  | 2.495384  | -0.770092 |
| O  | 5.00359   | 2.098502  | 1.705164  |
| O  | 2.416815  | 1.444521  | 1.319669  |
| O  | 4.473213  | 0.129536  | 0.087514  |
| O  | 3.047996  | -2.055825 | -0.456995 |
| O  | 2.955851  | 0.003109  | -2.161273 |
| O  | 5.213366  | -1.419333 | -1.990248 |
| O  | -0.963774 | 0.106421  | 1.896533  |
| O  | -4.088746 | -0.184623 | -0.947365 |
| O  | -3.293769 | -0.956688 | 1.506478  |
| O  | -3.793187 | -2.804014 | -0.458275 |
| O  | -5.893689 | 1.760953  | -1.410867 |
| O  | -4.691965 | 1.519658  | 1.025356  |
| O  | -3.417151 | 2.447518  | -1.216595 |
| H  | 3.153514  | 0.955159  | -2.189932 |
| H  | 1.691765  | 1.205849  | 0.654757  |
| H  | 5.855509  | -1.94638  | -1.49425  |
| H  | -2.450131 | -0.458577 | 1.788307  |
| H  | -4.751438 | -2.871252 | -0.568657 |
| H  | -4.370629 | 0.727692  | 1.49564   |
| H  | -2.544424 | 2.47214   | -0.744245 |
| H  | 3.17627   | 3.237033  | -0.737563 |
| H  | 4.744554  | 2.858001  | 2.244431  |
| Si | 3.937306  | -0.838553 | -1.135059 |
| Si | -3.218582 | -1.304417 | -0.111639 |
| H  | 2.146923  | -2.199204 | -0.839065 |
| H  | -1.064087 | 1.015958  | 1.562306  |
| Si | 3.894662  | 1.582922  | 0.612505  |
| Si | -4.502113 | 1.390882  | -0.61078  |
| H  | -6.644015 | 1.187394  | -1.206001 |
| Al | -0.096678 | -0.923561 | 0.68945   |
| O  | 1.58023   | -1.219033 | 1.698642  |
| H  | 1.96339   | -0.348492 | 1.944114  |
| O  | -1.136048 | 2.383689  | 0.165495  |
| O  | 0.622938  | 0.466312  | -0.281986 |
| H  | 1.060311  | 0.263453  | -1.122796 |
| O  | -1.630537 | -1.240762 | -0.530538 |
| H  | -0.806399 | -1.979152 | -0.88796  |
| O  | 0.397839  | -2.300679 | -0.628531 |
| H  | 0.357417  | -3.197775 | -0.262894 |
| O  | -0.742085 | -2.528504 | 1.804784  |
| H  | -0.16738  | -2.671359 | 2.574074  |
| H  | -1.640384 | -2.409883 | 2.159619  |
| H  | -0.445816 | 1.771668  | -0.207257 |
| H  | -0.684545 | 3.220361  | 0.343753  |
| H  | 2.259506  | -1.627158 | 1.105425  |

Frequencies -- -993.9082      23.7138      26.0656  
 Frequencies -- 31.1098      42.0689      45.6836  
 Frequencies -- 60.5548      68.0173      72.3926

Zero-point correction= 0.307353 (Hartree/Particle)  
 Thermal correction to Energy= 0.344620  
 Thermal correction to Enthalpy= 0.345564  
 Thermal correction to Gibbs Free Energy= 0.239837  
 Sum of electronic and zero-point Energies= -2918.467561  
 Sum of electronic and thermal Energies= -2918.430294  
 Sum of electronic and thermal Enthalpies= -2918.429350  
 Sum of electronic and thermal Free Energies= -2918.535078

PENT-6-INT-Bondi.log

46

|    |           |           |           |
|----|-----------|-----------|-----------|
| O  | 4.105696  | 1.134131  | -3.055459 |
| O  | 1.990483  | 1.333275  | -1.483861 |
| O  | 3.083671  | -1.123267 | -1.960669 |
| O  | 4.344891  | 0.684503  | -0.398286 |
| O  | 3.175676  | -0.154904 | 1.876057  |
| O  | 5.169522  | 1.661058  | 2.003824  |
| O  | 2.874507  | 2.433227  | 1.032959  |
| O  | -1.578954 | -1.474616 | 0.541395  |
| O  | -3.175081 | 0.633156  | 0.201603  |
| O  | -4.121336 | -1.872445 | -0.236515 |
| O  | -2.338684 | -0.687657 | -1.934007 |
| O  | -4.043071 | 2.818561  | -0.959319 |
| O  | -5.642642 | 0.588003  | -0.913435 |
| O  | -5.162787 | 1.855597  | 1.387071  |
| H  | 5.676616  | 0.964471  | 2.44214   |
| H  | 2.791975  | -1.552898 | -1.096061 |
| H  | 2.307652  | 2.369722  | 0.242461  |
| H  | -4.933835 | -1.414556 | -0.510321 |
| H  | -2.657366 | -1.382356 | -2.528592 |
| H  | -5.580696 | 0.625607  | -1.878763 |
| H  | -6.073102 | 2.182254  | 1.393329  |
| H  | 5.037005  | 0.903752  | -3.177673 |
| H  | 1.209757  | 0.75651   | -1.368102 |
| Si | 3.881006  | 1.131971  | 1.12995   |
| Si | -2.783566 | -0.908382 | -0.322087 |
| H  | 2.893286  | -0.919682 | 1.271068  |
| H  | -2.204767 | 0.937902  | 1.762965  |
| Si | 3.387061  | 0.472074  | -1.733779 |
| Si | -4.536601 | 1.511752  | -0.092163 |
| H  | -4.722716 | 3.474432  | -1.168209 |
| Al | 0.216543  | -1.843404 | 0.386802  |
| O  | 0.502584  | -0.041322 | 1.162288  |
| H  | -0.249456 | 0.367849  | 1.680663  |
| O  | -1.531602 | 1.026626  | 2.466961  |
| O  | 0.27899   | -0.921124 | -1.428296 |
| H  | 0.862898  | -1.341835 | -2.081752 |
| O  | -0.026564 | -3.531684 | -0.192336 |
| H  | 0.789476  | -3.94059  | -0.503104 |
| O  | 2.115416  | -1.9204   | 0.326249  |
| H  | 2.441008  | -2.801361 | 0.553934  |
| O  | 0.221497  | -2.48681  | 2.327233  |
| H  | -0.45412  | -2.020404 | 2.845102  |
| H  | -0.073567 | -3.411373 | 2.279113  |
| H  | -0.626632 | -0.828945 | -1.826051 |
| H  | -1.792572 | 0.369075  | 3.128375  |
| H  | 1.335811  | 0.091605  | 1.656524  |

Frequencies -- 16.0050      21.1071      34.9654  
 Frequencies -- 37.6156      43.4178      54.2035  
 Frequencies -- 64.9199      65.4818      84.7507

Zero-point correction= 0.311166 (Hartree/Particle)  
 Thermal correction to Energy= 0.349661  
 Thermal correction to Enthalpy= 0.350605  
 Thermal correction to Gibbs Free Energy= 0.242315  
 Sum of electronic and zero-point Energies= -2918.475148  
 Sum of electronic and thermal Energies= -2918.436653  
 Sum of electronic and thermal Enthalpies= -2918.435709  
 Sum of electronic and thermal Free Energies= -2918.543999

PENT-6-TS2-Bondi.log

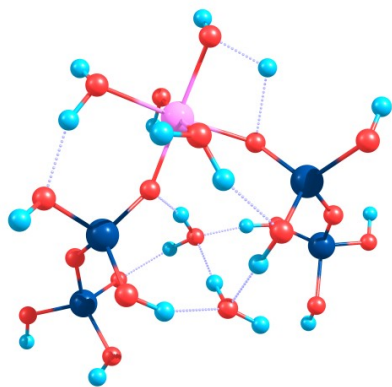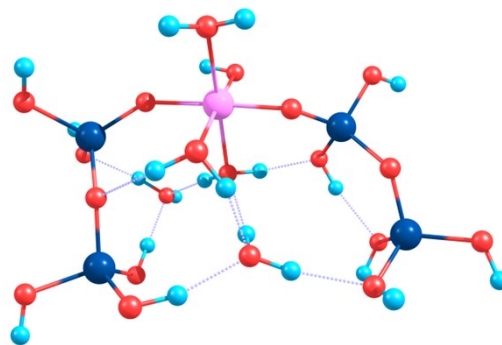

```

46
O      2.374702  -3.229053  0.836748
O      4.558417  -3.002671  -0.669345
O      2.235588  -2.280533  -1.755103
O      3.284394  -0.843303  0.306129
O      1.888499  1.273247  -0.629777
O      1.599232  0.4966    1.949015
O      3.849402  1.589335  1.261141
O      -0.898318 1.037744  -0.326681
O      -3.264196 -0.16341  -0.201253
O      -2.944275 2.277863  0.839266
O      -1.892969 0.188305  2.104195
O      -2.805906 -2.375103 -1.549112
O      -3.155776 -2.591645 1.065798
O      -5.277229 -1.781218 -0.486984
H      0.988719  -0.280491  1.848226
H      1.32098   -1.911697  -1.663061
H      4.489814  1.897908  0.606216
H      -3.268308 2.458043  1.732354
H      -1.278045 -0.572493  2.1104
H      -3.403717 -2.202832  1.916455
H      -5.692365 -2.652035 -0.419231
H      2.139287  -4.130701  0.576248
H      5.004351  -2.669767  -1.460268
Si     2.642777  0.628705  0.662015
Si     -2.189239 0.806867  0.606619
H      -0.401573 -0.422538  -1.045939
Si     3.088082  -2.325996  -0.361668
Si     -3.646703 -1.748756  -0.260729
H      -2.827509 -3.338202  -1.643827
Al     0.237631  2.431045  -0.768975
O      0.069686  -1.679828  1.498693
H      -0.063015 -1.691313  0.517384
O      -0.207706 -1.385346  -1.185297
O      0.504699  2.81122   1.207623
H      -0.170935  3.305829  1.692418
O      0.017217  2.352372  -2.55064
H      -0.423646  1.528194  -2.790176
O      1.435939  3.961876  -0.995976
H      1.482868  4.138462  -1.951422
H      0.712815  1.983088  1.711748
H      -1.04036  -1.786178  -1.508628
H      2.553692  2.909712  -0.90602
H      0.72182  -2.38662  1.654967
O      -1.233539  3.809035  -0.540099
H      -1.993597  3.431942  -0.029606
H      -1.57222  4.012701  -1.425626

Frequencies -- 1422.3532    27.2155    35.6015
Frequencies --  41.3729    47.9053    56.0851
Frequencies --  65.5624    68.9984    73.8402

Zero-point correction=      0.304445 (Hartree/Particle)
Thermal correction to Energy=      0.342733
Thermal correction to Enthalpy=     0.343678
Thermal correction to Gibbs Free Energy=  0.237389
Sum of electronic and zero-point Energies= -2918.415121
Sum of electronic and thermal Energies= -2918.376833
Sum of electronic and thermal Enthalpies= -2918.375889
Sum of electronic and thermal Free Energies= -2918.482177

```

```

46
O      -2.504389  2.460352  1.362269
O      -4.472846  2.764726  -0.510332
O      -1.901215  2.923597  -1.211437
O      -3.019036  0.585788  -0.557836
O      -2.100196  -1.863416  -0.148668
O      -4.140908  -0.806318  1.365562
O      -4.608073  -1.533784  -1.134675
O      1.51321    -1.534805  -0.732241
O      3.844569  -0.166021  -0.525209
O      3.69417    -2.739555  0.198697
O      2.462142  -0.790458  1.678594
O      3.282387  2.502267  -0.853696
O      4.01504    1.542782  1.486664
O      5.825519  1.515372  -0.607609
H      -4.597859  -1.600783  1.676596
H      -0.960246  2.70447    -1.023069
H      -4.279699  -2.068757  -1.869881
H      4.516931   -2.688943  0.704068
H      2.956857   0.01412   1.930695
H      3.653057   2.393305  1.772322
H      6.226735   2.381888  -0.451793
H      -2.391391  1.68282   1.954742
H      -4.61838  3.687975  -0.263402
Si     -3.417527  -0.965043  -0.136402
Si     2.836295  -1.325948  0.130123
H      0.456804   1.38132   0.202547
Si     -2.958333  2.190878  -0.189378
Si     4.259067   1.363493  -0.142748
H      3.430643   2.652626  -1.799097
Al     -0.260294  -1.785663  -0.266353
O      -0.559005  -0.304286  -1.677547
H      0.061852   0.442306  -1.49383
O      0.564198   1.879572  -0.63076
O      -2.082737  0.186217  2.773054
H      -2.897756  -0.303239  2.512907
O      0.063831  -3.082349  0.94112
H      -0.779342  -3.394717  1.291112
O      -0.093514  -0.250293  1.054447
H      0.769549  -0.400653  1.516868
O      -0.391411  -3.029703  -1.877166
H      -1.081508  -2.731646  -2.489627
H      0.44782   -2.964603  -2.360728
H      -1.986905  0.121185  3.733266
H      1.490218  2.195165  -0.666244
H      -0.80065  -0.154491  1.745554
H      -1.439827  0.099448  -1.568613

Frequencies -- 25.1072    27.3950    34.5487
Frequencies -- 39.8249    44.6113    55.3400
Frequencies -- 59.3975    71.2665    80.2297

Zero-point correction=      0.311957 (Hartree/Particle)
Thermal correction to Energy=      0.350817
Thermal correction to Enthalpy=     0.351762
Thermal correction to Gibbs Free Energy=  0.243564
Sum of electronic and zero-point Energies= -2918.487062
Sum of electronic and thermal Energies= -2918.448201
Sum of electronic and thermal Enthalpies= -2918.447257
Sum of electronic and thermal Free Energies= -2918.555454

```

## Anionic Si

PENT-6-PRD-Bondi2.log

bondi-Si-RCT.log

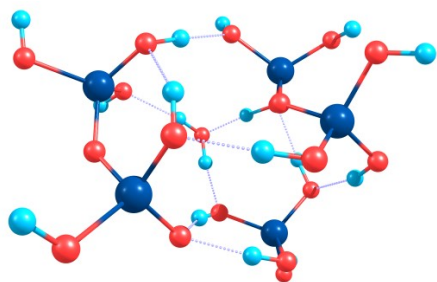

|    |           |           |           |
|----|-----------|-----------|-----------|
| O  | -2.275838 | -3.325833 | -0.189937 |
| O  | 0.374822  | -2.89017  | -0.821514 |
| O  | -1.65356  | -1.55404  | -2.049648 |
| O  | -0.922421 | -1.1049   | 0.538883  |
| O  | -3.330377 | -0.155903 | 1.392994  |
| O  | -2.15786  | -2.261053 | 2.537418  |
| O  | -1.064864 | 0.238945  | 2.84126   |
| O  | 0.77037   | 2.390583  | 0.466132  |
| O  | 2.986271  | 0.903113  | -0.017735 |
| O  | 1.523648  | 0.318442  | 2.136821  |
| O  | 2.891989  | 2.622713  | 2.055551  |
| O  | 4.908767  | -0.823697 | -0.350598 |
| O  | 2.433624  | -1.692042 | 0.395937  |
| O  | 2.798869  | -0.861607 | -2.094789 |
| H  | -2.956695 | -2.32812  | 3.078635  |
| H  | -0.902787 | -1.101202 | -2.568545 |
| H  | -0.094628 | 0.29599   | 2.64081   |
| H  | 1.685817  | -0.548691 | 1.711033  |
| H  | 3.565817  | 2.176242  | 2.586064  |
| H  | 1.692813  | -2.15986  | -0.060973 |
| H  | 3.340569  | -0.411095 | -2.759234 |
| H  | -2.373711 | -3.377805 | 0.778098  |
| H  | 0.554008  | -3.384931 | -1.633144 |
| Si | -1.87832  | -0.770253 | 1.848757  |
| Si | 1.971591  | 1.59316   | 1.127413  |
| H  | -3.299713 | 0.295463  | 0.521868  |
| H  | 0.184332  | 2.073513  | -0.913573 |
| Si | -1.141396 | -2.225754 | -0.646743 |
| Si | 3.283014  | -0.62088  | -0.521349 |
| H  | 5.235327  | -1.707372 | -0.570694 |
| O  | -2.930164 | 0.801224  | -1.216951 |
| H  | -2.490197 | 0.003791  | -1.586386 |
| O  | -0.483845 | 1.928834  | -1.68443  |
| O  | -2.815686 | 3.395792  | -1.821917 |
| H  | -3.301698 | 3.128641  | -2.613636 |
| O  | -1.852671 | 2.598864  | 0.509969  |
| H  | -0.889606 | 2.534838  | 0.765253  |
| O  | 0.249202  | -0.230595 | -3.161097 |
| H  | 0.039096  | 0.607139  | -2.682129 |
| H  | 1.093549  | -0.529718 | -2.767835 |
| Si | -1.998067 | 2.169712  | -1.06925  |

|                |         |         |         |
|----------------|---------|---------|---------|
| Frequencies -- | 22.4097 | 32.4709 | 41.0579 |
| Frequencies -- | 51.0458 | 53.0401 | 57.7673 |
| Frequencies -- | 60.3426 | 68.8644 | 77.2226 |

|                                              |                             |
|----------------------------------------------|-----------------------------|
| Zero-point correction=                       | 0.262225 (Hartree/Particle) |
| Thermal correction to Energy=                | 0.296280                    |
| Thermal correction to Enthalpy=              | 0.297224                    |
| Thermal correction to Gibbs Free Energy=     | 0.197576                    |
| Sum of electronic and zero-point Energies=   | -2888.047128                |
| Sum of electronic and thermal Energies=      | -2888.013074                |
| Sum of electronic and thermal Enthalpies=    | -2888.012130                |
| Sum of electronic and thermal Free Energies= | -2888.111778                |

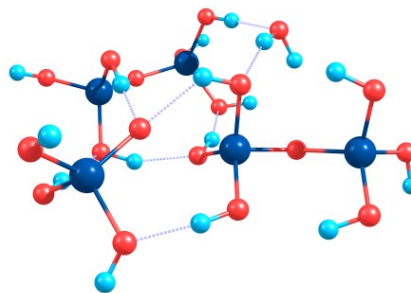

41  
Si5H17O19

|    |           |           |           |
|----|-----------|-----------|-----------|
| O  | -0.023436 | -0.082378 | -1.160194 |
| O  | -2.059282 | 1.766633  | -0.841303 |
| O  | -1.301684 | 0.205153  | 1.409667  |
| O  | 0.340807  | 1.96214   | 0.693605  |
| O  | 1.147847  | 4.513901  | 1.381212  |
| O  | 2.103219  | 3.455109  | -0.791295 |
| O  | -0.557744 | 4.022081  | -0.6787   |
| O  | 4.696213  | 0.17258   | 0.1113    |
| O  | 2.95648   | -1.700687 | -0.329178 |
| O  | 2.52991   | 0.750691  | -1.36957  |
| O  | 2.247949  | 0.358139  | 1.297385  |
| O  | 0.682688  | -2.681352 | -1.191649 |
| O  | 2.869627  | -4.264709 | -0.651914 |
| O  | 1.421898  | -3.230294 | 1.366001  |
| H  | 2.354316  | 2.557681  | -1.095385 |
| H  | -0.684126 | 0.878931  | 1.758691  |
| H  | -0.323955 | 4.487142  | -1.493632 |
| H  | 1.562698  | 0.578692  | -1.470804 |
| H  | 1.491014  | 1.012126  | 1.090597  |
| H  | 2.553081  | -5.12722  | -0.351542 |
| H  | 0.473334  | -2.964805 | 1.525624  |
| O  | 0.073857  | -1.06051  | -1.245057 |
| H  | -1.564587 | 2.619063  | -0.802925 |
| Si | 0.767145  | 3.420538  | 0.183741  |
| Si | 3.072697  | -0.082672 | -0.036104 |
| H  | 0.421177  | 4.683609  | 1.995581  |
| H  | 4.927648  | 0.987213  | 0.577097  |
| Si | -1.31553  | 0.417819  | -0.255738 |
| Si | 1.960429  | -2.983745 | -0.152327 |
| H  | -0.040949 | -3.323713 | -1.172008 |
| O  | -4.90145  | -2.004146 | -0.628223 |
| H  | -5.179286 | -1.973716 | -1.55365  |
| O  | -2.466743 | -0.767015 | -0.599113 |
| O  | -4.7211   | 0.674866  | -0.757671 |
| H  | -4.031167 | 1.341492  | -0.936008 |
| O  | -4.124239 | -0.758945 | 1.52428   |
| H  | -3.309957 | -0.424793 | 1.934835  |
| O  | -1.119352 | -2.53159  | 1.713436  |
| H  | -1.552493 | -2.696189 | 0.862464  |
| H  | -1.121106 | -1.551459 | 1.771878  |
| Si | -4.043481 | -0.693724 | -0.123884 |

|                |           |         |         |
|----------------|-----------|---------|---------|
| Frequencies -- | -124.6731 | 17.4249 | 26.4137 |
| Frequencies -- | 33.0364   | 41.4922 | 44.5765 |
| Frequencies -- | 57.4560   | 60.0535 | 64.9373 |

|                                              |                             |
|----------------------------------------------|-----------------------------|
| Zero-point correction=                       | 0.263062 (Hartree/Particle) |
| Thermal correction to Energy=                | 0.296946                    |
| Thermal correction to Enthalpy=              | 0.297890                    |
| Thermal correction to Gibbs Free Energy=     | 0.197613                    |
| Sum of electronic and zero-point Energies=   | -2888.031767                |
| Sum of electronic and thermal Energies=      | -2887.997883                |
| Sum of electronic and thermal Enthalpies=    | -2887.996938                |
| Sum of electronic and thermal Free Energies= | -2888.097215                |

bondi-Si-TS1freqb.log

Bondi-Si-INT.log



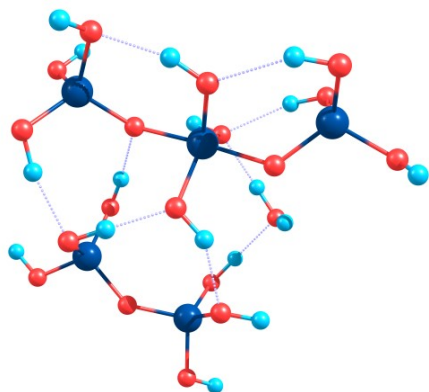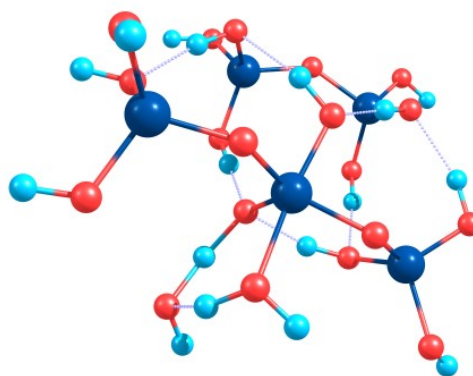

41  
Si5H17O19

|    |           |           |           |
|----|-----------|-----------|-----------|
| O  | 0.081232  | -0.07152  | -1.031285 |
| O  | -2.347872 | 1.507374  | -0.794946 |
| O  | -1.383228 | 0.065448  | 1.576178  |
| O  | -0.126885 | 1.842304  | 0.46296   |
| O  | 0.607668  | 4.227109  | 1.488056  |
| O  | 1.439133  | 3.605337  | -0.928771 |
| O  | -1.203036 | 4.04829   | -0.540618 |
| O  | 4.643756  | 0.723027  | 0.120343  |
| O  | 3.116771  | -1.324498 | -0.358555 |
| O  | 2.420613  | 1.065619  | -1.378946 |
| O  | 2.213087  | 0.648105  | 1.297769  |
| O  | 1.046923  | -2.679139 | -1.265319 |
| O  | 3.389082  | -3.891682 | -0.480434 |
| O  | 1.695789  | -2.909683 | 1.36723   |
| H  | 1.897016  | 2.764594  | -1.153505 |
| H  | -0.935894 | 0.705847  | 2.145774  |
| H  | -1.067289 | 4.561077  | -1.349314 |
| H  | 1.494912  | 0.713336  | -1.481941 |
| H  | 1.332618  | 1.047665  | 1.10536   |
| H  | 3.172412  | -4.760774 | -0.117002 |
| H  | 0.704383  | -2.817686 | 1.446612  |
| H  | 0.042441  | -1.011971 | -1.279052 |
| H  | -2.122942 | 2.456501  | -0.754551 |
| Si | 0.190463  | 3.397208  | 0.117616  |
| Si | 3.065459  | 0.290009  | -0.060207 |
| H  | -0.036847 | 4.162591  | 2.205984  |
| H  | 4.779781  | 1.583518  | 0.53935   |
| Si | -1.208957 | 0.485019  | -0.084374 |
| Si | 2.280267  | -2.715548 | -0.143144 |
| H  | 0.459793  | -3.448413 | -1.255589 |
| O  | -4.292936 | -2.657837 | -0.537531 |
| H  | -4.390256 | -2.823328 | -1.484944 |
| O  | -2.164918 | -0.949949 | -0.491096 |
| O  | -4.637868 | -0.052489 | -1.06409  |
| H  | -4.064372 | 0.730779  | -1.19045  |
| O  | -4.024658 | -0.974408 | 1.457049  |
| H  | -3.22647  | -0.587946 | 1.864548  |
| O  | -0.940743 | -2.653908 | 1.49847   |
| H  | -1.213846 | -2.579673 | 0.567683  |
| H  | -1.068262 | -1.725002 | 1.790327  |
| Si | -3.756691 | -1.136053 | -0.170676 |

Frequencies -- 25.0957 32.2350 37.7888  
 Frequencies -- 43.6271 45.7100 56.4328  
 Frequencies -- 65.9176 70.3868 81.0679

Zero-point correction= 0.264851 (Hartree/Particle)  
 Thermal correction to Energy= 0.299264  
 Thermal correction to Enthalpy= 0.300208  
 Thermal correction to Gibbs Free Energy= 0.199622  
 Sum of electronic and zero-point Energies= -2888.040642  
 Sum of electronic and thermal Energies= -2888.006229  
 Sum of electronic and thermal Enthalpies= -2888.005285  
 Sum of electronic and thermal Free Energies= -2888.105871

41  
Si5H17O19

|    |           |           |           |
|----|-----------|-----------|-----------|
| O  | -0.020778 | -0.034436 | -1.333162 |
| O  | 2.352243  | -2.280104 | 0.363889  |
| O  | 0.698373  | -0.443393 | 1.158408  |
| O  | 0.186775  | -2.399677 | -0.809212 |
| O  | -1.515178 | -1.979921 | 1.234203  |
| O  | -2.510367 | -2.84105  | -1.11465  |
| O  | -0.956094 | -4.497549 | 0.276894  |
| O  | -4.702368 | 1.41574   | -0.77729  |
| O  | -2.302546 | 2.229763  | -0.216987 |
| O  | -2.582109 | -0.116602 | -1.494712 |
| O  | -3.34377  | 0.07078   | 1.105181  |
| O  | 0.243138  | 2.749016  | -0.687007 |
| O  | -1.28153  | 4.241396  | 1.049454  |
| O  | -0.450892 | 1.792719  | 1.761872  |
| H  | -2.730948 | -1.911073 | -1.348475 |
| H  | 1.487499  | -0.827223 | 2.002489  |
| H  | -1.701016 | -4.933673 | 0.712536  |
| H  | -1.566807 | -0.091323 | -1.50166  |
| H  | -2.753629 | -0.713241 | 1.185774  |
| H  | -0.5779   | 4.669516  | 1.555336  |
| H  | 0.00786   | 0.931142  | 1.508598  |
| H  | 0.224557  | 0.907001  | -1.354212 |
| H  | 1.951751  | -3.160941 | 0.360331  |
| Si | -1.207872 | -2.913746 | -0.115236 |
| Si | -3.214274 | 0.863279  | -0.326486 |
| H  | -0.737278 | -1.393393 | 1.436772  |
| H  | -5.420753 | 0.781672  | -0.651902 |
| Si | 1.068238  | -1.007975 | -0.36251  |
| Si | -0.909677 | 2.724741  | 0.507196  |
| H  | 1.166008  | 2.6222    | -0.369954 |
| O  | 2.775857  | 2.053461  | 0.092311  |
| H  | 3.337163  | 2.719666  | 0.513017  |
| O  | 2.419788  | -0.292499 | -1.100909 |
| O  | 4.38541   | 1.371277  | -1.890186 |
| H  | 4.908554  | 0.725899  | -2.3859   |
| O  | 4.548146  | -0.005975 | 0.471296  |
| H  | 5.246476  | 0.544203  | 0.852006  |
| O  | 2.385475  | -1.380183 | 2.586296  |
| H  | 1.970644  | -2.006363 | 3.197771  |
| H  | 2.503815  | -1.969407 | 1.493591  |
| Si | 3.552687  | 0.753934  | -0.603796 |

Frequencies -- -1300.8456 30.9186 33.5073  
 Frequencies -- 42.8499 52.7951 76.1003  
 Frequencies -- 78.5861 82.2401 85.8875

Zero-point correction= 0.257526 (Hartree/Particle)  
 Thermal correction to Energy= 0.290324  
 Thermal correction to Enthalpy= 0.291268  
 Thermal correction to Gibbs Free Energy= 0.195320  
 Sum of electronic and zero-point Energies= -2888.018766  
 Sum of electronic and thermal Energies= -2887.985968  
 Sum of electronic and thermal Enthalpies= -2887.985023  
 Sum of electronic and thermal Free Energies= -2888.080971

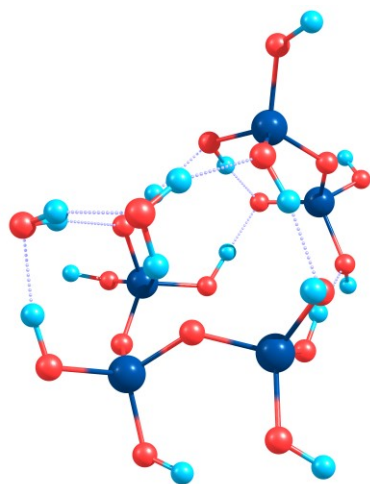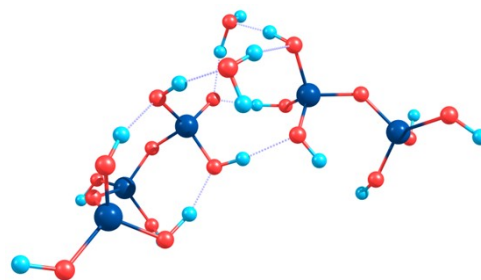

41  
Si5H17O19

|                |           |           |           |
|----------------|-----------|-----------|-----------|
| O              | 1.211944  | -0.940758 | 2.226143  |
| O              | 1.913744  | 1.537688  | 1.234828  |
| O              | 3.482576  | 0.269937  | 2.933614  |
| O              | 3.132725  | -0.681893 | 0.379482  |
| O              | 2.601233  | 1.403638  | -1.235532 |
| O              | 4.782331  | -0.196825 | -1.719852 |
| O              | 2.38364   | -1.248003 | -2.040729 |
| O              | -1.448021 | -0.735378 | 3.098084  |
| O              | -1.779663 | -0.901129 | 0.179792  |
| O              | -3.934154 | -0.813879 | -1.446717 |
| O              | -3.987527 | 0.457291  | 0.910812  |
| O              | -0.073684 | -2.867727 | 0.717694  |
| O              | -2.348176 | -3.220777 | -0.831371 |
| O              | -0.192226 | -1.979296 | -1.800224 |
| H              | 5.272191  | 0.634512  | -1.658577 |
| H              | 3.726595  | -0.52956  | 3.419834  |
| H              | 2.435456  | -1.138293 | -3.001312 |
| H              | -3.769084 | -1.771309 | -1.402722 |
| H              | -2.162145 | -3.952267 | -1.436809 |
| H              | 0.747734  | -1.679103 | -1.756632 |
| H              | 0.903344  | -1.621526 | 1.589006  |
| Si             | 3.218088  | -0.072428 | -1.177907 |
| Si             | -3.047152 | 0.040187  | -0.353946 |
| H              | 1.103961  | 1.393081  | -1.642552 |
| Si             | 2.428994  | 0.035062  | 1.688671  |
| Si             | -1.066253 | -2.243221 | -0.461352 |
| H              | -0.535102 | -3.214715 | 1.496622  |
| O              | 0.115773  | 1.327019  | -1.877225 |
| O              | -2.441307 | 1.366452  | -1.114602 |
| O              | -0.618901 | 2.202507  | 0.632846  |
| H              | -1.820732 | 2.08653   | 2.01806   |
| O              | -1.151579 | 3.651438  | -1.601211 |
| H              | -1.682718 | 4.250622  | -1.058906 |
| H              | 0.287984  | 1.931179  | 0.920469  |
| H              | -1.765763 | -0.956474 | 2.206527  |
| H              | -0.4844   | -0.650388 | 2.955092  |
| O              | -2.486222 | 1.769864  | 2.664539  |
| H              | -2.078777 | 0.935063  | 2.998424  |
| H              | -3.519497 | 1.006742  | 1.605819  |
| H              | 2.208329  | 1.667358  | 0.261332  |
| Si             | -0.974207 | 2.126626  | -0.980941 |
| Frequencies -- | 34.8368   | 41.1537   | 48.0232   |
| Frequencies -- | 49.7354   | 55.6699   | 67.4363   |
| Frequencies -- | 72.4757   | 80.7284   | 88.1637   |

Zero-point correction= 0.263864 (Hartree/Particle)  
 Thermal correction to Energy= 0.297663  
 Thermal correction to Enthalpy= 0.298607  
 Thermal correction to Gibbs Free Energy= 0.201044  
 Sum of electronic and zero-point Energies= -2888.050126  
 Sum of electronic and thermal Energies= -2888.016326  
 Sum of electronic and thermal Enthalpies= -2888.015382  
 Sum of electronic and thermal Free Energies= -2888.112945

41  
Si5H17O19

|                |           |           |           |
|----------------|-----------|-----------|-----------|
| O              | 2.647846  | 1.574071  | 1.563462  |
| O              | 1.922683  | -0.724795 | 0.475801  |
| O              | 2.308369  | 1.44929   | -1.145754 |
| O              | 4.390134  | 0.241171  | 0.000699  |
| O              | 5.979943  | -0.880384 | -1.899967 |
| O              | 5.933226  | -1.725212 | 0.733147  |
| O              | 3.906458  | -2.239853 | -0.95852  |
| O              | 0.476151  | 0.350949  | 2.858723  |
| O              | -4.402848 | -0.370247 | 0.001522  |
| O              | -3.488572 | -0.747141 | -2.503475 |
| O              | -5.005056 | 1.401704  | -1.959693 |
| O              | -4.766405 | -2.753507 | 1.270179  |
| O              | -2.554825 | -2.321967 | -0.041724 |
| O              | -3.078717 | -0.896315 | 2.26184   |
| H              | 6.424178  | -2.542091 | 0.56717   |
| H              | 1.347032  | 1.780383  | -1.045033 |
| H              | 3.630551  | -2.214672 | -1.88616  |
| H              | -3.134947 | -1.565389 | -2.119377 |
| H              | -1.751758 | -1.76085  | -0.17251  |
| H              | -2.629565 | -0.037388 | 2.080027  |
| H              | 2.190541  | 2.464949  | 1.430276  |
| H              | 2.303399  | -1.500191 | 0.021897  |
| Si             | 5.082571  | -1.144504 | -0.546918 |
| Si             | -3.86026  | 0.387142  | -1.363337 |
| H              | 6.551503  | -0.099776 | -1.875931 |
| Si             | 2.806338  | 0.673942  | 0.196979  |
| Si             | -3.687091 | -1.57309  | 0.895571  |
| H              | -5.568679 | -2.452098 | 1.717565  |
| O              | -1.605541 | 1.304878  | 1.445681  |
| H              | -0.84011  | 1.058317  | 2.033288  |
| O              | -2.590663 | 1.353956  | -1.002884 |
| O              | -0.061815 | 2.266837  | -0.612977 |
| O              | -0.689376 | -0.386901 | -0.453872 |
| H              | 0.223785  | -0.585843 | -0.151554 |
| H              | 0.559911  | -0.496064 | 2.394209  |
| H              | 1.277188  | 0.830112  | 2.556491  |
| H              | -5.807096 | 0.969573  | -2.283258 |
| O              | 1.219682  | 3.712809  | 1.144393  |
| H              | 1.713792  | 4.367822  | 0.631247  |
| H              | 0.644377  | 3.237591  | 0.466959  |
| Si             | -1.160094 | 1.20443   | -0.166435 |
| Frequencies -- | 17.5744   | 19.8219   | 31.5465   |
| Frequencies -- | 35.7919   | 43.6967   | 52.4490   |
| Frequencies -- | 61.5397   | 69.5081   | 79.7683   |

Zero-point correction= 0.263611 (Hartree/Particle)  
 Thermal correction to Energy= 0.297979  
 Thermal correction to Enthalpy= 0.298923  
 Thermal correction to Gibbs Free Energy= 0.197177  
 Sum of electronic and zero-point Energies= -2888.039147  
 Sum of electronic and thermal Energies= -2888.004780  
 Sum of electronic and thermal Enthalpies= -2888.003836  
 Sum of electronic and thermal Free Energies= -2888.105582

## bondi-Si-TS3h-d3e.log

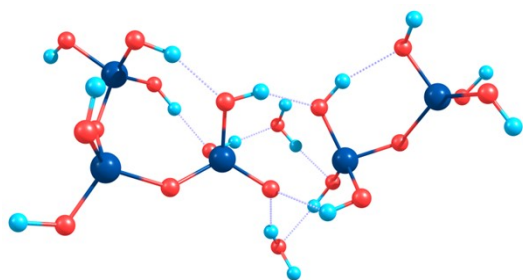

```

41
Si5H17O19
O      2.594242  1.512946  1.551275
O      1.818504 -0.717126  0.021209
O      2.636    1.703083 -1.32107
O      4.210093  0.270545  0.063555
O      5.472501 -0.860454 -2.108375
O      6.345713 -1.132507  0.487289
O      4.067279 -2.337746 -0.450544
O      0.922717 -0.398959  2.830738
O      -4.353477 -0.064473  0.104342
O      -3.679304  0.1205   -2.495167
O      -4.624798  2.290931 -1.219279
O      -5.282525 -2.576478  0.607496
O      -3.080024 -2.27129  -0.754491
O      -3.131686 -1.598493  1.91842
H      6.963516 -1.840725  0.259635
H      1.729539  2.03143  -1.449962
H      4.007901 -2.844528 -1.27274
H      -3.511876 -0.829978 -2.380597
H      -2.152922 -1.934249 -0.767251
H      -2.508389 -0.834487  1.973725
H      1.994469  2.295121  1.644
H      2.458386 -1.448699 -0.098662
Si     5.046316 -0.989511 -0.517962
Si     -3.724032  0.928546 -1.05732
H      5.963409 -0.059835 -2.340014
Si     2.586035  0.782351  0.05924
Si     -3.94698  -1.627239  0.495461
H      -5.969376 -2.252414  1.205815
O      -1.360315  0.504923  1.699595
H      -0.574827  0.213932  2.23576
O      -2.246414  1.460347 -0.58986
O      0.429341  1.570344 -0.081718
O      -0.813546 -0.764529 -0.646724
H      0.121136 -1.052172 -0.561817
H      1.108522 -1.021973  2.108417
H      1.53663   0.333206  2.611831
H      -5.52159  2.155279 -1.553896
O      0.825692  3.567645  1.551025
H      1.252589  4.293761  1.074484
H      0.517537  2.941832  0.835846
Si     -0.919524  0.735913  0.101559

Frequencies -- -116.1612    10.8567    16.0988
Frequencies --  28.6405    31.9399    40.0768
Frequencies --  48.1367    59.3327    73.3710

```

```

Zero-point correction=      0.264286 (Hartree/Particle)
Thermal correction to Energy= 0.298360
Thermal correction to Enthalpy= 0.299304
Thermal correction to Gibbs Free Energy= 0.197493
Sum of electronic and zero-point Energies= -2888.024275
Sum of electronic and thermal Energies= -2887.990200
Sum of electronic and thermal Enthalpies= -2887.989256
Sum of electronic and thermal Free Energies= -2888.091068

```

## bondi-Si-INT2.log

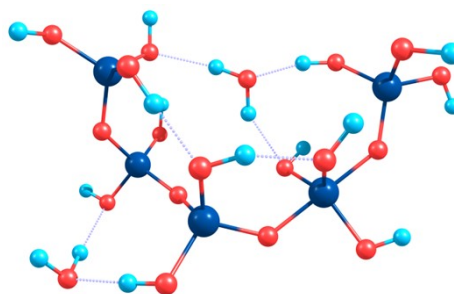

```

41
Si5H17O19
O      1.5421    0.72956  1.413454
O      2.028477  0.690797 -1.508409
O      3.047    2.917556  0.122214
O      3.782391  0.552868  0.312783
O      3.310979 -2.037948  1.072806
O      4.043643 -1.508188 -1.421126
O      5.796126 -1.192027  0.621091
O      -4.290387  2.847352 -0.40544
O      -3.268996 -0.758821  0.04459
O      -3.858518  1.17192  1.835197
O      -2.143618 -0.805557  2.491659
O      -1.906452 -1.769389 -2.036345
O      -1.853285 -2.895724  0.502488
O      -3.982225 -3.154846 -1.05513
H      4.694709 -1.124896 -2.026071
H      3.984723  2.740686  0.272358
H      6.155625 -0.404546  1.051358
H      -4.639733  0.735713  2.204298
H      -1.73226  -3.851688  0.41098
H      -4.415836 -2.989126 -1.90344
H      2.215489  0.208505  1.872446
H      2.684203 -0.000571 -1.694796
Si     4.214014 -1.002689  0.166844
Si     -2.67233  0.163749  1.273389
H      2.354192 -2.07788  0.824855
Si     2.226912  1.448674  0.016937
Si     -2.745308 -2.13984 -0.689435
H      -1.435461 -0.896783 -1.980989
O      -0.616617  0.567135 -1.754197
H      0.356219  0.406988 -1.863562
O      -1.499931  1.147618  0.734034
O      0.711035  2.329551 -0.248102
O      -1.7024  2.9969  -1.185575
H      -2.648577  2.972698 -0.892289
H      -4.69132  2.205086 -1.009094
H      -4.27827  2.381168  0.45452
H      -1.923395 -1.703319  2.187632
O      0.742079 -1.711153  0.292341
H      0.679351 -0.854231  0.758319
H      -0.051169 -2.21729  0.54194
Si     -0.763267  1.782153 -0.6131

Frequencies --  19.3647    28.0869    35.1820
Frequencies --  50.5970    58.1803    66.3557
Frequencies --  70.2175    75.8113    82.9376

```

```

Zero-point correction=      0.266174 (Hartree/Particle)
Thermal correction to Energy= 0.300247
Thermal correction to Enthalpy= 0.301191
Thermal correction to Gibbs Free Energy= 0.202184
Sum of electronic and zero-point Energies= -2888.035337
Sum of electronic and thermal Energies= -2888.001264
Sum of electronic and thermal Enthalpies= -2888.000320
Sum of electronic and thermal Free Energies= -2888.099328

```

## bondi-Si-TS4f.log

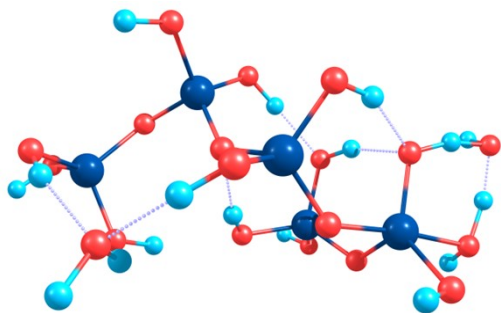

```

41
Si5H17O19
O      4.756077  0.381092 -0.576194
O      2.948378 -0.653737 0.930234
O      3.676709 -1.402715 -1.850366
O      2.462287  1.170875 -1.181685
O      1.625507  3.595798 -0.588756
O     -0.230995  1.71628  -0.960193
O      1.353568  1.543856  1.222812
O      0.929756 -2.348504  1.342254
O     -2.932859  0.824088  1.026247
O     -0.782292  0.607311  2.641138
O     -2.395503 -1.446205  2.429483
O     -2.937327  1.01238  -1.687075
O     -4.494789 -0.782455 -0.532732
O     -5.04077  1.8256  -0.079815
H     -0.50879  0.805724 -0.72504
H     -0.013374  1.03687  2.1963
H     -3.939485 -1.355828 -1.106143
H     -5.692111  1.900121 -0.790574
Si     1.295863  1.998678 -0.38314
Si     -1.752843 -0.183452  1.59508
H      0.942445  4.206879 -0.280807
Si     2.961213 -0.394539 -0.716265
Si     -3.855055  0.7163  -0.336487
O     -0.513758 -3.080753 -0.790142
H     -1.262379 -2.762512 -1.343339
O     -0.928462 -0.668512  0.248223
O     1.352279 -1.094443 -1.006083
O     -2.539766 -1.815129 -2.181667
H     -2.305828 -0.872969 -2.283183
H     -3.135758 -1.890312  1.992762
H     -2.791252 -2.115206 -3.067505
O     5.060263  0.094097  1.794954
H     3.955225 -0.339424  1.494755
H     3.001076 -2.009682 -2.183198
H     -2.196195  1.630928 -1.57128
H     5.055242  0.344639  0.520752
H     4.889539  0.941357  2.231594
H     1.771736 -1.828544  1.434721
Si     0.253008 -1.822675 -0.061681
H     4.693389  1.31214  -0.833038
H     1.959506  0.764047  1.343052

```

```

Frequencies -- -1154.9764  29.1423  33.3000
Frequencies --  41.6423  51.9118  55.7552
Frequencies --  63.0710  64.8653  90.1258

```

```

Zero-point correction=      0.260274 (Hartree/Particle)
Thermal correction to Energy=  0.292814
Thermal correction to Enthalpy= 0.293758
Thermal correction to Gibbs Free Energy= 0.198657
Sum of electronic and zero-point Energies= -2888.023878
Sum of electronic and thermal Energies= -2887.991339
Sum of electronic and thermal Enthalpies= -2887.990394
Sum of electronic and thermal Free Energies= -2888.085496

```

## bondi-Si-PRD2.log

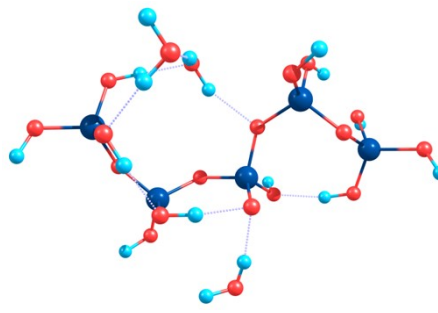

```

41
Si5H17O19
O      2.277139  1.482811  1.317388
O      1.833583 -3.007233  1.731516
O      2.701456  3.170253 -0.843278
O      3.593674  0.645324 -0.835033
O      5.828804 -0.790567 -0.331779
O      3.64549  -0.924761  1.319388
O      3.743995 -2.059503 -1.166761
O      0.097425  4.063454  1.288649
O     -3.305209 -0.604292  0.6918
O     -1.404909 -2.424324  1.313988
O     -2.666014 -2.550362 -1.065598
O     -4.252061  1.767147 -0.203602
O     -4.75718  -0.646983 -1.463209
O     -5.953104 -0.014954  0.832548
H      3.149254 -0.122551  1.599304
H      3.542248  3.5441  -0.544931
H      2.765723 -2.259313 -1.158517
H     -1.981045 -3.08071  1.72874
H     -5.241816 -0.198881 -2.169133
H     -6.002169  0.495791  1.652458
Si     4.184456 -0.790856 -0.249377
Si     -2.085533 -1.549252  0.104128
H      6.266781 -0.097357  0.180006
Si     2.383256  1.64072  -0.328756
Si     -4.569045  0.172001 -0.034556
H     -3.315079  1.952224 -0.44879
O     -1.631175  1.948023 -0.950352
H     -1.652851  1.833446 -1.911879
O     -0.887932 -0.593639 -0.497279
O      0.948935  1.207292 -1.006161
O     -0.351561  1.359113  1.370499
H      1.029892  4.091606  1.541279
H     -0.139838  3.11384  1.418895
H     -3.417745 -2.151278 -1.54082
H      1.298746  1.419129  1.565054
H      2.513704 -2.300847  1.689054
O      1.158509 -2.584871 -0.882146
H      0.638712 -1.761604 -0.891253
H      1.269957 -2.786703  0.080138
Si     -0.486712  0.998891 -0.16638
H      2.346684 -3.827369  1.694939

```

```

Frequencies --  20.9911  25.7436  34.2773
Frequencies --  35.3646  44.3204  47.0790
Frequencies --  49.2684  59.2881  76.0000

```

```

Zero-point correction=      0.262802 (Hartree/Particle)
Thermal correction to Energy=  0.298781
Thermal correction to Enthalpy= 0.299726
Thermal correction to Gibbs Free Energy= 0.194630
Sum of electronic and zero-point Energies= -2888.031591
Sum of electronic and thermal Energies= -2887.995612
Sum of electronic and thermal Enthalpies= -2887.994668
Sum of electronic and thermal Free Energies= -2888.099763

```

## Anionic Q0

bondi-4-RCT-d3c.log

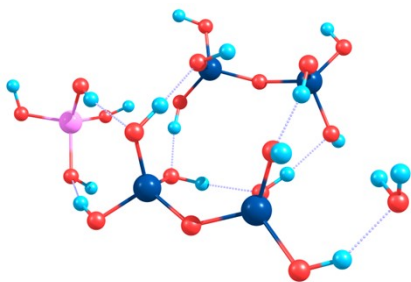

```

42
AlSi4H18O19
O      -3.996766  -3.175596  -0.158806
O      -3.631431  -0.713595  -1.187848
O      -2.987186  -1.165915  1.340185
O      -1.499687  -2.285741  -0.614896
O      -0.068417  -1.309347  1.437584
O      0.297495   -3.859094  0.44955
O      1.155269   -1.72894   -0.913049
O      1.213226   1.092481   1.541298
O      -0.275231  2.899762   0.155388
O      1.005014   0.946205   -1.156776
O      2.394054   2.96623    0.041142
O      -2.82577   3.568964   -0.235908
O      -1.7173    1.257205   -1.267323
O      -2.23812   1.419835   1.334144
H      1.162685   -4.031638   0.846234
H      -2.831332  -0.190858  1.359819
H      1.192324   -0.745315  -1.010701
H      0.101466   0.953939   -1.537622
H      3.203509   2.412205   -0.227678
H      -2.420057  0.58217    -1.372297
H      -2.476314  1.926068   2.124272
H      -3.545701  -4.0307    -0.186026
H      -3.884872  -1.026559  -2.069497
Si     -0.005344   -2.284816  0.090155
Si     1.11142    1.979473   0.15688
H      -0.95522   -1.273178  1.838739
H      3.25885    -1.856232  -1.294947
Si     -3.017926  -1.863442  -0.142311
Si     -1.802872  2.314317   -0.004587
H      -3.73435   3.199059   -0.316418
Al     4.516552   -0.346628  -0.129765
O      6.237833   -0.382307  0.290616
H      6.413775   -1.030797  0.983625
O      4.147176   -1.495102  -1.427142
O      3.532804   -0.687045  1.296127
H      2.863686   -0.016312  1.493699
O      4.216608   1.324642   -0.76345
H      3.944413   1.277747   -1.689864
H      0.691718   0.256709   1.545336
O      -4.972596  1.773207   -0.196829
H      -4.889686  1.538288   0.739301
H      -4.699761  0.957328   -0.653036

Frequencies -- 23.1443      24.2845      31.1403
Frequencies -- 40.8922      52.2903      54.6028
Frequencies -- 61.2287      70.2804      80.2821

Zero-point correction=      0.270915 (Hartree/Particle)
Thermal correction to Energy=      0.307391
Thermal correction to Enthalpy=      0.308335
Thermal correction to Gibbs Free Energy=      0.202994
Sum of electronic and zero-point Energies= -2841.594240
Sum of electronic and thermal Energies= -2841.557764
Sum of electronic and thermal Enthalpies= -2841.556820
Sum of electronic and thermal Free Energies= -2841.662161
    
```

## bondi-4-TS1-d3b.log

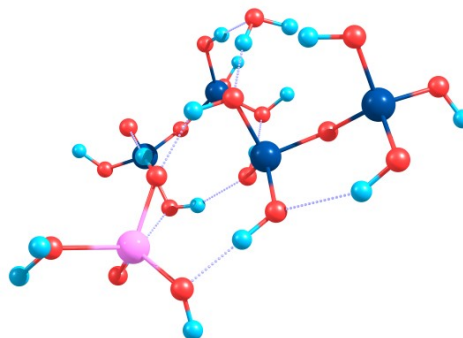

```

42
AlSi4H18O19
O      -0.056851  -0.025542  -1.203437
O      -1.955928  1.94803    -0.721985
O      -1.327531  0.169645   1.404249
O      0.450999   1.841311   0.716906
O      1.587568   4.425823   1.518816
O      2.467775   3.342831   -0.918235
O      -0.420494  4.139319   -0.566319
O      4.708147   -0.089769  -0.009969
O      2.815683   -1.910396  -0.415872
O      2.628914   0.553355   -1.420089
O      2.288219   0.164547   1.286603
O      0.388531   -2.681012  -1.104723
O      2.461472   -4.448733  -0.739236
O      1.261916   -3.32161    1.383275
H      2.700114   2.432454   -1.186588
H      -0.696854  0.762003   1.848869
H      -0.347692  4.597675   -1.412728
H      1.657119   0.481238   -1.532581
H      1.200474   1.170524   0.939672
H      2.039542   -5.274183  -0.46586
H      0.341084   -3.012003   1.607
H      -0.00238   -1.00935   -1.260582
H      -1.427134  2.787122   -0.659038
Si     3.047092   -0.288176  -0.026704
H      0.948408   4.945386   2.033295
H      5.051061   -0.057094  0.8925
Si     -1.291997  0.517195   -0.244647
Si     1.721119   -3.084774  -0.166249
H      -0.413493  -3.196375  -0.939223
O      -5.046302  -1.600048  -0.845823
H      -5.313843  -1.412129  -1.75545
O      -2.529423  -0.553609  -0.673702
O      -4.66492   1.053206   -0.564824
H      -3.91864   1.664543  -0.720764
O      -4.177259  -0.765223  1.454183
H      -3.364788  -0.491017  1.908825
O      -1.208907  -2.516384  1.936767
H      -1.79599   -2.828355  1.233317
H      -1.199246  -1.540818  1.81291
Si     -4.089029  -0.445493  -0.164932
Al     1.027354   3.340976   0.041501
H      2.39319    4.959242   1.419692

Frequencies -- -131.5985      19.2614      22.6686
Frequencies -- 33.9443      36.8286      39.9822
Frequencies -- 52.1488      57.2609      63.5802

Zero-point correction=      0.272234 (Hartree/Particle)
Thermal correction to Energy=      0.307718
Thermal correction to Enthalpy=      0.308663
Thermal correction to Gibbs Free Energy=      0.204552
Sum of electronic and zero-point Energies= -2841.567242
Sum of electronic and thermal Energies= -2841.531758
Sum of electronic and thermal Enthalpies= -2841.530813
Sum of electronic and thermal Free Energies= -2841.634924
    
```

## bondi-4-INT-d3l.log

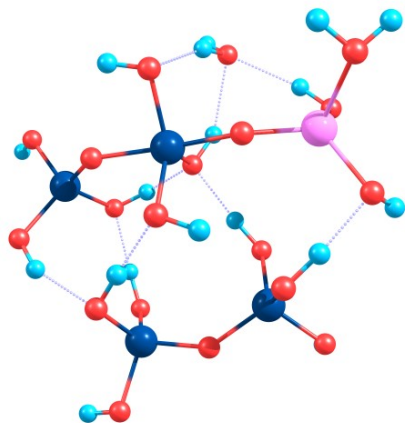

```

42
AlSi4H18O19
O      -0.119094 -0.20462 -1.700142
O      1.404456 -2.86846 -1.043399
O      0.435725 -1.039178 1.018189
O      -0.933476 -2.261632 -0.754461
O      -2.114124 -1.516907 1.546618
O      -3.639141 -1.922636 -0.63335
O      -2.464156 -4.024127 0.505227
O      -4.009854 2.71662 -0.499357
O      -1.439856 2.691895 -0.155155
O      -2.599623 0.556977 -1.31467
O      -3.017001 1.032993 1.33084
O      0.994956 2.464425 -1.118562
O      0.543202 4.202549 0.85042
O      0.480427 1.62935 1.465179
H      -3.494536 -1.024682 -1.000603
H      1.217956 -1.392468 1.485916
H      -3.189012 -4.206402 1.118296
H      -1.658482 0.25902 -1.505436
H      -2.725018 0.093916 1.431646
H      0.266409 4.362006 1.763064
H      0.424192 0.659381 1.279396
H      0.467074 0.568073 -1.78923
H      0.734533 -3.56641 -1.061284
Si     -2.264223 -2.41808 0.139096
Si     -2.754485 1.706063 -0.13996
H      -1.145419 -1.330404 1.640363
H      -4.883695 2.361032 -0.290181
Si     0.631999 -1.374315 -0.684861
Si     0.15027 2.704029 0.271214
H      1.966206 2.320219 -0.931865
O      3.489731 1.956789 -0.369627
H      3.655686 2.519468 0.397663
O      2.140599 -0.587248 -0.815405
O      4.855086 -0.43266 -1.156653
H      4.633439 -1.245708 -1.639206
O      3.867607 -0.141384 1.607434
H      3.590187 -1.047058 1.826448
O      2.683942 -2.739695 1.457292
H      2.385482 -3.471741 2.014145
H      2.388351 -2.96583 0.547308
Al     3.419133 0.22219 -0.034211
H      5.752802 -0.533036 -0.8019

Frequencies -- 27.1298 32.4197 49.5250
Frequencies -- 58.2087 60.6165 65.2226
Frequencies -- 80.1016 82.0370 86.2939

Zero-point correction= 0.274969 (Hartree/Particle)
Thermal correction to Energy= 0.309957
Thermal correction to Enthalpy= 0.310901
Thermal correction to Gibbs Free Energy= 0.210486
Sum of electronic and zero-point Energies= -2841.587474
Sum of electronic and thermal Energies= -2841.552486
Sum of electronic and thermal Enthalpies= -2841.551542
Sum of electronic and thermal Free Energies= -2841.651957

```

## bondi-4-TS2-d3fs3.log

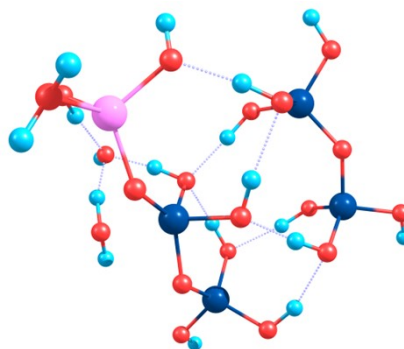

```

42
AlSi4H18O19
O      0.121652 0.082567 -1.3064
O      -2.175085 2.541761 0.474806
O      -0.62185 0.540519 1.148359
O      -0.030372 2.475987 -0.804762
O      1.664861 2.008289 1.236781
O      2.697197 2.716885 -1.138109
O      1.256033 4.522587 0.19172
O      4.660761 -1.676197 -0.545292
O      2.193223 -2.35968 -0.142884
O      2.685118 -0.02667 -1.393854
O      3.244185 -0.258822 1.251025
O      -0.319016 -2.661373 -0.909025
O      0.907807 -4.367709 0.867437
O      0.181954 -1.922176 1.665101
H      2.895222 1.767082 -1.301365
H      -1.38799 0.768154 1.837412
H      2.035578 4.931994 0.591316
H      1.673918 0.027641 -1.440688
H      2.768172 0.601476 1.261152
H      0.114218 -4.787523 1.225871
H      -0.111654 -0.994023 1.452614
H      -0.181703 -0.84272 -1.366847
H      -1.652999 3.324762 0.699624
Si     1.406469 2.914394 -0.142605
Si     3.178832 -1.043875 -0.189935
H      0.859668 1.490305 1.482754
H      5.40234 -1.076427 -0.389066
Si     -0.953303 1.114239 -0.405176
Si     0.697536 -2.800385 0.385915
H      -1.295632 -2.566714 -0.698763
O      -2.8659 -2.232186 -0.45926
H      -3.218126 -2.827822 0.214463
O      -2.347745 0.563102 -1.079775
O      -4.77665 -0.682132 -1.828175
H      -4.893232 0.091738 -2.403731
O      -4.423774 -0.152563 0.970054
H      -3.89826 0.337712 1.648676
O      -2.635624 1.192758 2.443921
H      -2.560119 1.626975 3.303297
H      -2.484235 2.083793 1.418423
Al     -3.482862 -0.577731 -0.411047
H      -4.735647 -1.466687 -2.399653

Frequencies -- -241.7482 25.5368 43.2708
Frequencies -- 47.0537 60.3243 70.6650
Frequencies -- 74.5687 77.3407 91.1015

Zero-point correction= 0.271361 (Hartree/Particle)
Thermal correction to Energy= 0.304545
Thermal correction to Enthalpy= 0.305489
Thermal correction to Gibbs Free Energy= 0.209381
Sum of electronic and zero-point Energies= -2841.574800
Sum of electronic and thermal Energies= -2841.541616
Sum of electronic and thermal Enthalpies= -2841.540672
Sum of electronic and thermal Free Energies= -2841.636780

```

bondi-4-PRD1-d3.log

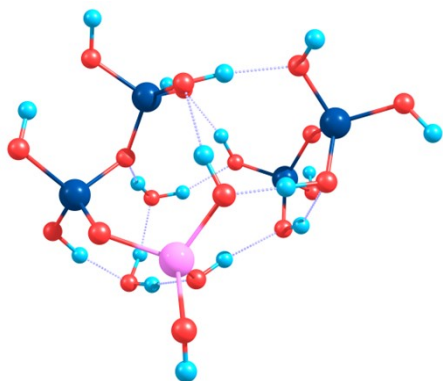

42  
AlSi4H18O19

|    |           |           |           |
|----|-----------|-----------|-----------|
| O  | 1.326696  | -0.72919  | 2.329251  |
| O  | 1.887656  | 1.706993  | 1.186964  |
| O  | 3.556552  | 0.620061  | 2.905346  |
| O  | 3.205239  | -0.509859 | 0.437046  |
| O  | 2.485645  | 1.225922  | -1.48132  |
| O  | 4.818588  | -0.119228 | -1.709305 |
| O  | 2.555813  | -1.51612  | -1.876201 |
| O  | -1.35314  | -0.442321 | 3.158713  |
| O  | -1.811288 | -0.957159 | 0.318745  |
| O  | -4.06325  | -1.227231 | -1.127726 |
| O  | -4.054389 | 0.322078  | 1.041896  |
| O  | 0.170013  | -2.701504 | 0.816712  |
| O  | -2.078345 | -3.359942 | -0.639108 |
| O  | -0.132789 | -1.753643 | -1.651769 |
| H  | 5.171961  | 0.77274   | -1.830837 |
| H  | 3.837207  | -0.130748 | 3.446547  |
| H  | 2.720036  | -1.613627 | -2.825796 |
| H  | -3.735071 | -2.137836 | -1.046702 |
| H  | -1.813104 | -4.053822 | -1.258885 |
| H  | 0.85276   | -1.796349 | -1.656365 |
| H  | 1.005711  | -1.438853 | 1.727177  |
| Si | 3.262656  | -0.178525 | -1.179688 |
| Si | -3.168282 | -0.136176 | -0.258876 |
| H  | 1.468158  | 1.167996  | -1.725084 |
| Si | 2.486599  | 0.25866   | 1.710506  |
| Si | -0.948    | -2.201465 | -0.305273 |
| H  | -0.175493 | -3.27206  | 1.519732  |
| Al | -1.214012 | 2.06354   | -1.189391 |
| O  | 0.045569  | 1.081598  | -2.001649 |
| H  | -0.157764 | 0.129663  | -2.009256 |
| O  | -2.703763 | 1.091019  | -1.195961 |
| O  | -0.795915 | 2.468573  | 0.484299  |
| H  | -1.905979 | 2.229409  | 1.745942  |
| O  | -1.431958 | 3.525038  | -2.145338 |
| H  | -1.57201  | 4.311718  | -1.604839 |
| H  | 0.056244  | 2.141528  | 0.81668   |
| H  | -1.658342 | -0.757448 | 2.290257  |
| H  | -0.390394 | -0.356314 | 3.019833  |
| O  | -2.532788 | 1.965982  | 2.472665  |
| H  | -2.070266 | 1.201965  | 2.886168  |
| H  | -3.584267 | 1.003021  | 1.605556  |
| H  | 2.11798   | 1.849545  | 0.242504  |

|                |         |         |         |
|----------------|---------|---------|---------|
| Frequencies -- | 23.6933 | 37.3367 | 46.2985 |
| Frequencies -- | 50.0667 | 54.2550 | 58.9031 |
| Frequencies -- | 66.2008 | 75.1112 | 80.1130 |

Zero-point correction= 0.272566 (Hartree/Particle)  
 Thermal correction to Energy= 0.307927  
 Thermal correction to Enthalpy= 0.308872  
 Thermal correction to Gibbs Free Energy= 0.207456  
 Sum of electronic and zero-point Energies= -2841.624746  
 Sum of electronic and thermal Energies= -2841.589385  
 Sum of electronic and thermal Enthalpies= -2841.588440  
 Sum of electronic and thermal Free Energies= -2841.689855

bondi-4-RCT2k-d3b.log

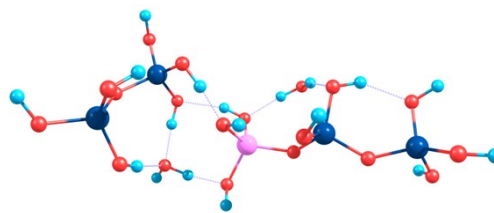

42  
AlSi4H18O19

|    |           |           |           |
|----|-----------|-----------|-----------|
| O  | 3.060832  | 2.040599  | 0.532509  |
| O  | 2.374944  | 0.508547  | -1.655845 |
| O  | 4.257548  | 2.428574  | -1.772996 |
| O  | 4.711106  | 0.143312  | -0.382546 |
| O  | 6.044258  | -2.209639 | -0.186548 |
| O  | 3.796813  | -1.884976 | 1.145664  |
| O  | 3.767254  | -2.076641 | -1.584797 |
| O  | -1.970585 | 3.210434  | -0.296594 |
| O  | -4.250611 | -0.786981 | 0.359356  |
| O  | -1.95329  | -1.793222 | -0.704453 |
| O  | -2.854088 | 0.640443  | -1.43731  |
| O  | -6.786247 | -0.159366 | 1.113531  |
| O  | -5.635218 | 0.776884  | -1.193773 |
| O  | -6.331662 | -1.87642  | -0.853263 |
| H  | 3.580198  | -1.111815 | 1.725921  |
| H  | 4.277039  | 2.22444   | -2.717757 |
| H  | 3.138222  | -1.416548 | -1.927322 |
| H  | -2.214357 | -2.084633 | -1.588976 |
| H  | -6.359859 | 0.923876  | -1.816913 |
| H  | -7.288499 | -1.932515 | -0.981341 |
| H  | 3.149147  | 1.490009  | 1.35432   |
| H  | 1.647714  | 0.095233  | -1.072938 |
| Si | 4.55657   | -1.501847 | -0.251747 |
| Si | -2.720824 | -0.419177 | -0.164578 |
| H  | 6.541467  | -2.186532 | -1.015445 |
| Si | 3.573119  | 1.265652  | -0.827657 |
| Si | -5.781442 | -0.50144  | -0.142994 |
| H  | -6.682827 | 0.720563  | 1.501967  |
| O  | 0.494332  | -0.06272  | 2.800359  |
| O  | -1.860295 | 0.151829  | 1.067598  |
| O  | 0.233252  | 2.125596  | 0.985501  |
| O  | 0.676316  | -0.570834 | -0.081069 |
| H  | 0.074142  | -1.208936 | -0.495191 |
| H  | -2.229585 | 2.423814  | -0.804194 |
| H  | -1.144434 | 2.914262  | 0.144929  |
| H  | -3.782449 | 0.882702  | -1.624535 |
| H  | 1.146843  | 2.317199  | 0.714892  |
| O  | 3.076887  | 0.287047  | 2.563691  |
| H  | 3.523045  | 0.488071  | 3.398223  |
| H  | 2.100282  | 0.142922  | 2.772198  |
| Al | -0.109589 | 0.412615  | 1.189744  |
| H  | 0.352273  | -0.990479 | 3.031039  |

|                |         |         |         |
|----------------|---------|---------|---------|
| Frequencies -- | 10.4357 | 19.2773 | 20.8373 |
| Frequencies -- | 29.1131 | 35.7458 | 39.5164 |
| Frequencies -- | 47.2307 | 48.9352 | 64.7404 |

Zero-point correction= 0.270410 (Hartree/Particle)  
 Thermal correction to Energy= 0.307211  
 Thermal correction to Enthalpy= 0.308155  
 Thermal correction to Gibbs Free Energy= 0.199655  
 Sum of electronic and zero-point Energies= -2841.607599  
 Sum of electronic and thermal Energies= -2841.570798  
 Sum of electronic and thermal Enthalpies= -2841.569854  
 Sum of electronic and thermal Free Energies= -2841.678354

bondi-fs3-TS3.log

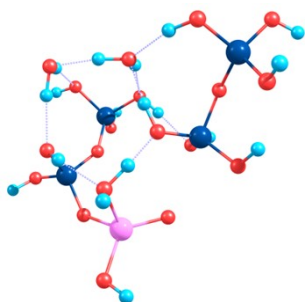

42  
AlSi4H18O19

|    |           |           |           |
|----|-----------|-----------|-----------|
| O  | -3.766911 | -1.109936 | 1.747945  |
| O  | -5.482113 | -1.215161 | -0.233084 |
| O  | -4.595401 | 1.244684  | 0.588758  |
| O  | -2.979505 | -0.297821 | -0.723878 |
| O  | -2.474307 | 2.262258  | -1.209582 |
| O  | -0.929496 | 0.743472  | 0.534141  |
| O  | -0.882837 | 0.137556  | -2.157839 |
| O  | 1.125332  | -2.244531 | 2.719029  |
| O  | 2.275536  | -0.806198 | -0.711031 |
| O  | 2.527823  | 0.011197  | 1.87253   |
| O  | 4.649548  | -0.515327 | 0.314927  |
| O  | 0.052951  | -2.279563 | -1.084654 |
| O  | 2.4261    | -2.79203  | -2.382693 |
| O  | 1.987062  | -3.35967  | 0.260013  |
| H  | 0.060491  | 1.704127  | 1.184819  |
| H  | -5.149683 | 1.466795  | 1.348645  |
| H  | -1.466985 | -0.171236 | -2.867946 |
| H  | 1.633141  | -1.42614  | 2.525423  |
| H  | 2.120415  | -3.643291 | -2.726065 |
| H  | 2.905203  | -3.65492  | 0.340443  |
| H  | -2.829326 | -1.416302 | 1.743483  |
| H  | -5.934868 | -0.805634 | -0.983323 |
| H  | -3.34318  | 2.287911  | -0.769741 |
| Si | -4.207137 | -0.355099 | 0.364514  |
| Si | 1.699753  | -2.302132 | -0.986358 |
| H  | -0.287133 | -1.473175 | -1.534173 |
| O  | 0.46795   | 2.694278  | -1.335145 |
| O  | 3.080041  | 1.681139  | -0.172314 |
| O  | 2.407778  | 4.362743  | 0.310808  |
| O  | 0.875678  | 2.224815  | 1.501369  |
| H  | 1.954532  | 0.775891  | 2.079089  |
| H  | -0.35514  | -1.901674 | 2.039803  |
| H  | 1.435555  | -2.842188 | 2.011251  |
| H  | 5.266591  | -0.111898 | 0.940479  |
| H  | 1.769547  | 5.084084  | 0.249978  |
| O  | -1.130044 | -1.701599 | 1.437735  |
| H  | -0.902782 | -2.149333 | 0.598363  |
| H  | -0.962229 | -0.171263 | 0.953486  |
| Si | 3.136273  | 0.153862  | 0.322043  |
| H  | 0.593446  | 2.923012  | 2.110723  |
| Al | 1.691672  | 2.826215  | -0.200782 |
| Si | -1.741805 | 0.82164   | -0.903831 |

Frequencies -- -112.6713      19.6431      33.1817  
 Frequencies -- 38.1705      44.4941      57.4538  
 Frequencies -- 61.4399      68.1938      72.8740

Zero-point correction= 0.273125 (Hartree/Particle)  
 Thermal correction to Energy= 0.308206  
 Thermal correction to Enthalpy= 0.309150  
 Thermal correction to Gibbs Free Energy= 0.208049  
 Sum of electronic and zero-point Energies= -2841.536158  
 Sum of electronic and thermal Energies= -2841.501077  
 Sum of electronic and thermal Enthalpies= -2841.500133  
 Sum of electronic and thermal Free Energies= -2841.601234

bondi-4-INT2-d3k.log

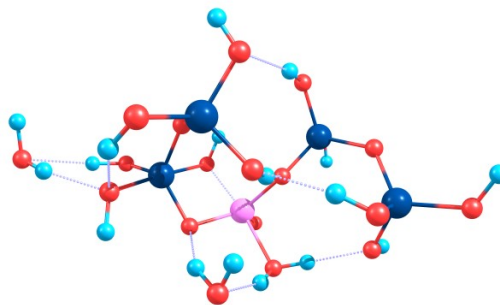

42  
AlSi4H18O19

|    |           |           |           |
|----|-----------|-----------|-----------|
| O  | 3.910146  | -1.338589 | 0.792785  |
| O  | 1.463123  | -1.707594 | 1.26519   |
| O  | 3.441144  | 0.416532  | -1.058191 |
| O  | 1.961125  | 0.735951  | 0.939857  |
| O  | 2.341073  | 2.927437  | -0.607766 |
| O  | -0.002532 | 1.563005  | -0.729357 |
| O  | 0.52839   | 2.943621  | 1.440406  |
| O  | -0.318256 | -3.612345 | 0.164375  |
| O  | -3.214697 | 0.546483  | 0.892958  |
| O  | -1.225002 | 0.920046  | 2.680567  |
| O  | -2.349592 | -1.404228 | 2.598149  |
| O  | -2.694173 | 1.622654  | -1.56372  |
| O  | -3.438506 | -0.932636 | -1.399593 |
| O  | -5.203131 | 0.96015   | -0.862116 |
| H  | -0.358814 | 0.701158  | -0.369477 |
| H  | -0.750457 | 1.681493  | 2.2972    |
| H  | -3.995666 | -1.62419  | -1.013322 |
| H  | -5.491195 | 1.729421  | -0.351398 |
| Si | 1.255455  | 2.040534  | 0.249317  |
| Si | -1.89129  | -0.152548 | 1.626365  |
| H  | 2.971491  | 2.269323  | -0.979498 |
| Si | 2.559369  | -0.632396 | 0.115122  |
| Si | -3.611807 | 0.571583  | -0.707084 |
| O  | -0.884003 | -1.939852 | -1.862488 |
| H  | -0.50053  | -1.254887 | -2.476807 |
| O  | -0.894896 | -0.607307 | 0.432567  |
| O  | 1.616692  | -1.344417 | -1.067834 |
| O  | 0.521769  | -0.024739 | -3.118132 |
| H  | 0.222593  | 0.760399  | -2.62771  |
| H  | -2.592239 | -2.209682 | 2.121456  |
| H  | 1.152329  | -0.430353 | -2.471543 |
| O  | 6.019088  | 0.215104  | -0.259269 |
| H  | 5.173081  | 0.488551  | -0.68699  |
| H  | 3.383774  | 0.044691  | -1.94827  |
| H  | -1.780211 | 1.794299  | -1.266324 |
| H  | 4.740819  | -0.940861 | 0.459299  |
| H  | 6.127108  | 0.849955  | 0.463293  |
| H  | -1.807481 | -1.643194 | -1.691322 |
| H  | 1.166684  | -1.209885 | 2.03855   |
| H  | 1.114777  | 3.214415  | 2.161986  |
| Al | 0.165882  | -1.951875 | -0.156731 |
| H  | 0.081205  | -3.94093  | 0.979199  |

Frequencies -- 31.8614      35.5369      40.4879  
 Frequencies -- 57.4879      62.5289      79.6887  
 Frequencies -- 83.9326      87.9272      97.4035

Zero-point correction= 0.276856 (Hartree/Particle)  
 Thermal correction to Energy= 0.311240  
 Thermal correction to Enthalpy= 0.312184  
 Thermal correction to Gibbs Free Energy= 0.214433  
 Sum of electronic and zero-point Energies= -2841.612339  
 Sum of electronic and thermal Energies= -2841.577954  
 Sum of electronic and thermal Enthalpies= -2841.577010  
 Sum of electronic and thermal Free Energies= -2841.674762



## Bondi-4-TS4d-d3h

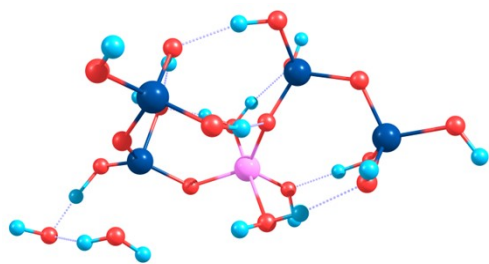

```

42
O      4.209306  -0.97334  1.003662
O      2.098413  0.184865  1.853292
O      3.550227  -1.30461  -1.566157
O      2.785415  0.939126  -0.520612
O      2.436995  3.403034  -1.356653
O      0.394446  1.71262  -1.620439
O      1.123471  2.502781  0.873905
O      0.044492  -1.333334  2.246139
O      -3.483498  0.911353  0.232785
O      -1.622554  2.622465  1.040223
O      -2.1059   0.35149  2.514491
O      -2.93736  -0.43458  -2.0768
O      -3.789275 -1.81391  0.027727
O      -5.483191 -0.054499 -1.093733
H      -0.222925  1.119696  -1.136406
H      -0.641302  2.729952  1.043767
H      -2.883247 -2.197077  0.198893
H      -5.920197 -0.728129  -1.632277
Si      1.668906  2.123259  -0.65735
Si      -2.015049 1.031039  0.994515
H      1.853004  4.044261  -1.783046
Si      2.802752  -0.513865  0.338233
Si      -3.913337  -0.372116  -0.718513
O      -1.335754  -2.82549  0.445698
H      -1.330498  -3.411317  -0.323029
O      -0.929015  0.148646  0.184534
O      1.555375  -1.536162  0.028128
O      -0.432301  -1.605724  -1.751024
H      -1.290365  -1.184755  -1.999498
H      -2.594186  0.829934  3.19761
H      0.266419  -1.122823  -2.218153
O      5.798072  -1.822025  -0.628435
H      4.537482  -1.589322  -1.338033
H      3.042149  -2.123953  -1.644858
H      -2.808702  0.419357  -2.516484
H      5.00916  -1.372586  0.306725
H      6.332215  -1.050316  -0.86546
H      0.858906  -0.738767  2.302623
H      2.794298  0.267872  2.519937
H      1.417289  1.772349  1.477795
Al      -0.18049  -1.475237  0.283194
H      -0.69786  -0.824374  2.638138

Frequencies --  -472.9287    17.5542    33.4068
Frequencies --   39.4911    55.1366    66.6910
Frequencies --   80.7584    89.9484    94.6874

```

```

Zero-point correction=      0.271535 (Hartree/Particle)
Thermal correction to Energy=  0.304743
Thermal correction to Enthalpy= 0.305687
Thermal correction to Gibbs Free Energy=  0.209690
Sum of electronic and zero-point Energies= -2841.590633
Sum of electronic and thermal Energies= -2841.557424
Sum of electronic and thermal Enthalpies= -2841.556480
Sum of electronic and thermal Free Energies= -2841.652477

```

## bondi-4-PRD2e-d3.log

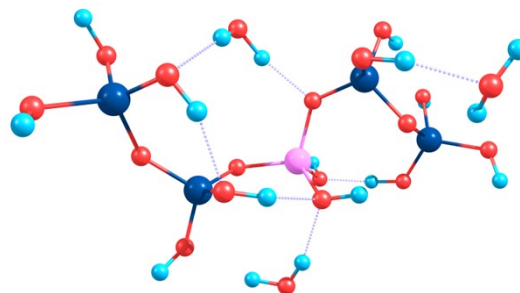

```

42
O      2.109244  0.726727  1.514576
O      2.989368  2.986858  0.207555
O      3.938005  0.535566  -0.368012
O      5.823901  -1.060482  0.778045
O      3.191505  -1.753816  0.837406
O      -3.130718 -2.005316  2.932346
O      0.308926  4.08981  0.983406
O      -2.915995 -0.415735  0.491346
O      -1.054333 -2.217607  1.1458
O      -2.593302 -2.636105  -1.021986
O      -3.849079  1.890788  -0.602104
O      -4.583588 -0.625212  -1.494636
O      -5.487754  0.328571  0.826184
H      2.640336  -1.095643  1.312238
H      3.635643  3.187258  0.899273
H      -3.426895 -1.258971  2.384357
H      -1.677553 -2.299995  1.905895
H      -5.142112 -0.241508  -2.183627
H      -5.432206  0.94561  1.568452
Si      4.390896  -1.014366  -0.03638
Si      -1.794908 -1.496671  -0.12933
H      5.745319  -1.022976  1.741415
Si      2.584228  1.384113  0.05825
Si      -4.2051  0.348744  -0.206866
H      -2.943346  2.031816  -1.004057
Al      -0.304178  1.038148  -0.695758
O      -1.391037  2.10758  -1.597294
H      -1.461773  1.937574  -2.545835
O      -0.719481 -0.661386  -1.019748
O      1.408987  1.292393  -1.046664
O      -0.461496  1.38676  1.049673
H      -1.277091  1.095681  1.47755
H      1.231175  3.927965  0.725527
H      -0.023092  3.193488  1.190959
H      -3.334742  -2.240834  -1.514147
H      1.140542  0.87597  1.649532
O      1.382385  -2.5036  -1.327266
O      0.729033  -1.779128  -1.299718
H      1.892376  -2.375933  -0.509134
O      4.625507  -1.736466  -1.490697
H      5.042712  -2.607948  -1.462283
H      -3.764  -2.708436  2.725577

```

```

Frequencies --  19.9538    26.0958    29.5715
Frequencies --  32.5176    42.5798    45.4181
Frequencies --  53.1002    56.8552    63.5006

```

```

Zero-point correction=      0.271828 (Hartree/Particle)
Thermal correction to Energy=  0.309299
Thermal correction to Enthalpy=  0.310243
Thermal correction to Gibbs Free Energy=  0.202101
Sum of electronic and zero-point Energies= -2841.615189
Sum of electronic and thermal Energies= -2841.577718
Sum of electronic and thermal Enthalpies= -2841.576774
Sum of electronic and thermal Free Energies= -2841.684916

```

# Anionic Q1

switch-4-RCT-d3e.log

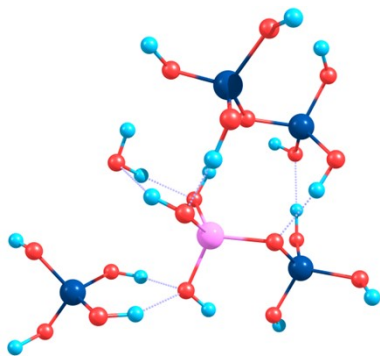

```

42
O      4.846777  -0.753831  0.773662
O      3.04891   0.975983  1.812562
O      3.280867  0.736442  -0.833749
O      2.192424  -1.267005  0.624297
O      1.447869  -2.152647  -1.862417
O      3.654861  -3.069088  -0.681179
O      1.237001  -3.656542  0.449231
O      -0.747491 -0.845671  -1.394978
O      0.669357  1.632459  -0.798574
O      -0.421793 -0.047624  1.377686
O      -2.184434  1.438313  -0.297795
O      -0.635558  3.874673  -0.281173
O      1.424068  3.215892  1.300986
O      1.957165  3.971068  -1.186749
H      3.939095  -3.049442  -1.606381
H      2.360069  1.018625  -1.039392
H      1.109513  -4.508764  0.007938
H      0.462862  -0.41657  1.514897
H      -2.052731  2.399633  -0.261445
H      2.013235  2.471185  1.539995
H      1.782058  3.911314  -2.13618
H      4.903233  -1.626922  0.3473
H      2.854642  0.579109  2.674054
Si     2.100755  -2.547268  -0.426554
H      0.591923  -1.619078  -1.778051
H      -5.242643 -2.560324  0.852408
Si     3.358778  -0.086684  0.580043
Si     0.866194  3.156873  -0.244286
H      -0.725971  4.681768  0.243779
O      -4.200987 -0.021518  -1.327556
H      -3.472046  0.63187  -1.19427
O      -4.784763 -2.137482  0.113427
O      -3.913712  0.169254  1.349887
O      -6.359078  0.057137  0.387452
H      -7.024028 -0.331361  -0.197355
H      -1.177568  -1.576268  -0.903242
O      -1.510995  -2.559232  0.740937
H      -1.233069  -1.726723  1.182489
H      -0.690929  -3.083816  0.734918
Si     -4.810973 -0.481416  0.131832
Al     -0.645113  0.53672  -0.280453
H      -3.221645  0.762678  0.967184
    
```

```

Frequencies -- 15.8038    26.9513    31.7847
Frequencies -- 34.0591    43.9119    45.4994
Frequencies -- 58.9411    62.6662    67.2532
    
```

```

Zero-point correction=      0.271682 (Hartree/Particle)
Thermal correction to Energy= 0.307954
Thermal correction to Enthalpy= 0.308898
Thermal correction to Gibbs Free Energy= 0.203213
Sum of electronic and zero-point Energies= -2841.607952
Sum of electronic and thermal Energies= -2841.571680
Sum of electronic and thermal Enthalpies= -2841.570736
Sum of electronic and thermal Free Energies= -2841.676421
    
```

# switch-4-TS1-try4.log

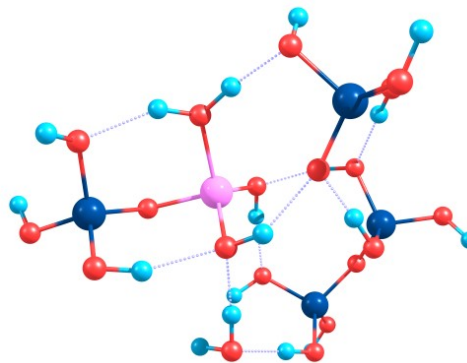

```

42
O      0.018622  -0.219517  -1.540725
O      -2.252511  1.497725  -1.010552
O      -1.299168  -0.265663  1.298735
O      0.064016  1.923792  0.878948
O      0.271841  4.516051  1.585773
O      1.553081  3.676988  -0.625073
O      -1.140058  3.785666  -0.607621
O      4.485952  1.146999  -0.058414
O      3.275134  -1.199796  -0.478394
O      2.273649  1.120177  -1.435138
O      2.15264  0.532922  1.236062
O      1.193467  -2.708176  -1.065027
O      3.716867  -3.727427  -0.640891
O      2.222115  -2.887396  1.436027
H      1.860604  2.842963  -1.044795
H      -0.822991  0.523085  1.628072
H      -0.913144  4.184562  -1.460233
H      1.374765  0.698191  -1.581964
H      1.317179  1.12516  1.12627
H      3.538179  -4.644378  -0.392831
H      1.258047  -2.762202  1.679216
H      0.39732  -1.120505  -1.530506
H      -1.903818  2.430855  -0.829982
Si     3.011425  0.400896  -0.140589
H      -3.226683  1.417159  -0.879855
H      4.871858  1.15473  0.827571
Si     2.580102  -2.642134  -0.134489
H      0.529533  -3.3476  -0.771318
O      -5.103794  -2.360912  -0.532957
H      -5.454288  -2.289359  -1.431091
O      -2.629323  -1.213182  -0.893613
O      -4.672935  0.350061  -0.50166
H      -5.364054  0.682439  0.087813
O      -3.872304  -1.327713  1.523724
H      -2.995438  -0.96463  1.775603
O      -0.327745  -2.636831  2.03993
H      -0.824867  -3.230369  1.459596
H      -0.658834  -1.728186  1.803924
Si     -4.047009  -1.165036  -0.109623
H      0.293872  5.441246  1.30566
Si     0.232051  3.412037  0.341561
Al     -1.352738  -0.040307  -0.464637
    
```

```

Frequencies -- -102.1227    24.4562    28.6825
Frequencies -- 38.7986    42.3900    47.6357
Frequencies -- 53.1924    60.5744    69.5344
    
```

```

Zero-point correction=      0.271663 (Hartree/Particle)
Thermal correction to Energy= 0.306299
Thermal correction to Enthalpy= 0.307243
Thermal correction to Gibbs Free Energy= 0.205732
Sum of electronic and zero-point Energies= -2841.601344
Sum of electronic and thermal Energies= -2841.566709
Sum of electronic and thermal Enthalpies= -2841.565764
Sum of electronic and thermal Free Energies= -2841.667275
    
```

switch-4-INTc-d3.log

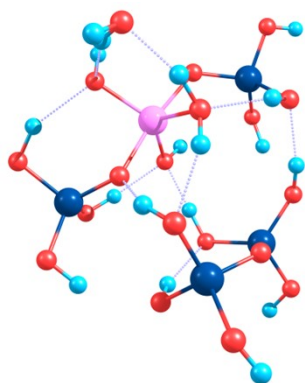

```

42
O      -3.10604  -0.890542  -0.223075
O      -1.814197  0.065337  1.963679
O      -3.400953  -1.985114  2.256807
O      -1.095371  -2.317145  0.870921
O      -0.964848  -4.239413  -1.055578
O      -0.797382  -1.654646  -1.705592
O      1.211601  -2.966029  -0.324553
O      1.049191  3.21717   -0.081114
O      2.73315   1.076069  -0.056559
O      0.694422  0.462191  -1.671868
O      0.893553  0.667339  1.774469
O      2.749169  -1.320678  1.175877
O      3.283341  -1.25008  -1.429323
O      5.058931  -0.137941  0.233302
H      -0.222042  -0.820047  -1.706028
H      -3.690714  -2.878203  2.02561
H      1.641589  -2.455242  0.401993
H      1.528587  0.211141  -2.093254
H      1.078135  1.497579  2.319057
H      2.573677  -1.915013  -1.379914
H      5.598343  -0.931081  0.113105
H      -2.516111  -1.026063  -0.993154
H      -1.599348  0.758519  1.254259
Si     -0.401551  -2.770417  -0.566434
H      -1.637188  -4.19963  -1.749096
H      1.911523  3.545066  -0.3686
Si     -2.349522  -1.29005  1.202945
Si     3.440577  -0.366308  -0.028891
H      2.169605  -0.759489  1.72814
O      -1.622818  3.897071  -0.855202
H      -0.682139  4.002944  -0.596233
O      -0.91448  1.478971  0.073061
O      -3.477238  2.021262  -0.60096
H      -3.650628  1.067623  -0.493673
O      -1.594661  1.714329  -2.518282
H      -0.738365  1.230952  -2.514701
H      0.010797  0.336628  2.059057
O      1.268376  3.101615  2.654621
H      0.451288  3.401911  3.079322
H      1.181978  3.388779  1.710343
Si     -1.884426  2.263998  -0.978114
Al     0.929996  1.408028  -0.111875
    
```

```

Frequencies -- 37.4052    42.1313    44.2776
Frequencies -- 48.6772    54.2097    62.7211
Frequencies -- 75.5097    81.0579    89.4547
    
```

```

Zero-point correction=      0.275904 (Hartree/Particle)
Thermal correction to Energy= 0.309551
Thermal correction to Enthalpy= 0.310495
Thermal correction to Gibbs Free Energy= 0.213503
Sum of electronic and zero-point Energies= -2841.625345
Sum of electronic and thermal Energies= -2841.591698
Sum of electronic and thermal Enthalpies= -2841.590754
Sum of electronic and thermal Free Energies= -2841.687746
    
```

switch-4-TS2b-d3b.log

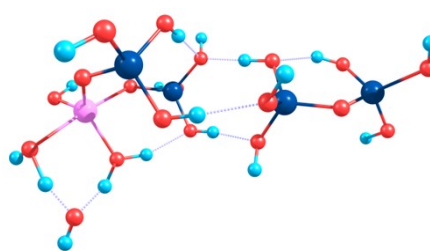

```

42
O      -4.992159  1.272412  -0.793415
O      -6.109558  0.658299  1.589686
O      -6.551447  -0.964244  -0.349123
O      -4.039351  -0.827655  0.58349
O      -1.706153  -2.088587  0.185896
O      -2.347953  0.330535  -1.048293
O      -1.654727  0.17729   1.510875
O      5.251598  1.281991  -0.48029
O      3.276497  -1.102794  -0.914358
O      3.050862  0.542519  1.742853
O      5.112868  -0.86763  0.992652
O      1.874825  -3.283734  -1.685219
O      1.056428  -1.680747  0.393362
O      0.841943  -1.012845  -2.237987
H      -1.504827  0.827119  -1.189918
H      -6.232445  -1.62072  -0.98279
H      -1.419025  -0.359051  2.282168
H      3.239465  -0.334955  2.399586
H      0.11814   -1.947244  0.360839
H      0.575967  -0.099496  -2.024434
H      -4.076955  1.19429   -1.126352
Si     -2.44116  -0.613023  0.286651
H      -2.05436  -2.719839  -0.459357
Si     -5.40126  0.054861  0.235208
Si     1.803529  -1.726727  -1.091624
H      2.543474  -3.82354  -1.243597
O      -0.011651  1.59728  -1.46099
H      -0.080458  2.125986  -2.270249
O      2.604387  1.543068  -0.679529
O      1.131003  3.813956  -0.521261
H      2.003195  4.200529  -0.675691
O      0.60974   1.732507  1.122043
H      2.117074  0.833192  1.720821
H      -0.221808  1.218985  1.190442
H      5.861481  -0.330482  1.28598
H      4.918876  2.07751  -0.913638
H      -5.725531  1.481859  1.918939
O      3.766354  -1.450891  2.903493
H      4.571622  -1.254858  1.964932
H      4.231725  -1.192164  3.711775
Al     3.84424   0.314202  0.038659
Si     1.171122  2.16149  -0.379027
    
```

```

Frequencies -- -899.5750    14.3685    20.8563
Frequencies -- 27.5302    35.1969    36.4513
Frequencies -- 38.5656    47.1999    50.7078
    
```

```

Zero-point correction=      0.265666 (Hartree/Particle)
Thermal correction to Energy= 0.301490
Thermal correction to Enthalpy= 0.302435
Thermal correction to Gibbs Free Energy= 0.196360
Sum of electronic and zero-point Energies= -2841.588562
Sum of electronic and thermal Energies= -2841.552737
Sum of electronic and thermal Enthalpies= -2841.551793
Sum of electronic and thermal Free Energies= -2841.657868
    
```

switch-4-PRD1-d3.log

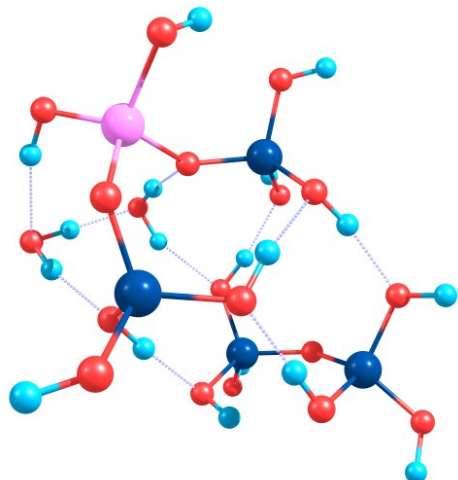

42

|    |           |           |           |
|----|-----------|-----------|-----------|
| O  | -1.106338 | -0.228548 | 2.288254  |
| O  | -1.921733 | -2.092863 | 0.460357  |
| O  | -3.374073 | -1.622321 | 2.59932   |
| O  | -3.165839 | 0.289099  | 0.660097  |
| O  | -2.685399 | -0.568664 | -1.836833 |
| O  | -4.929111 | 0.827433  | -1.337045 |
| O  | -2.606093 | 2.109881  | -1.128633 |
| O  | 1.620566  | -0.374421 | 3.11513   |
| O  | 1.90346   | 0.834578  | 0.61972   |
| O  | 4.001756  | 1.575087  | -1.203589 |
| O  | 4.41603   | -0.627058 | 0.674865  |
| O  | -0.176082 | 2.240639  | 1.622291  |
| O  | 1.986052  | 3.470469  | 0.45629   |
| O  | 0.134809  | 2.07685   | -0.990302 |
| H  | -5.397871 | 0.022611  | -1.598436 |
| H  | -3.545927 | -1.11275  | 3.403323  |
| H  | -2.802303 | 2.563893  | -1.961469 |
| H  | 3.824992  | 2.402539  | -0.736763 |
| H  | 1.594799  | 4.293824  | 0.132793  |
| H  | -0.836731 | 2.223759  | -0.938491 |
| H  | -0.855658 | 0.683313  | 2.003207  |
| Si | -3.349241 | 0.637429  | -0.939181 |
| H  | -1.699789 | -0.517391 | -1.983387 |
| Si | -2.386609 | -0.892226 | 1.508149  |
| Si | 0.992511  | 2.147952  | 0.426262  |
| H  | 0.143102  | 2.56434   | 2.47778   |
| O  | -0.049577 | -0.403462 | -2.05266  |
| H  | 0.135345  | 0.504037  | -1.711045 |
| O  | 2.58044   | -0.900757 | -1.579388 |
| O  | 0.750867  | -2.292293 | -0.231633 |
| H  | 2.029267  | -2.599499 | 1.09128   |
| O  | 0.955202  | -2.619871 | -2.922511 |
| H  | 1.31696   | -3.495579 | -2.731834 |
| H  | -0.186209 | -2.26469  | 0.057964  |
| H  | 1.816404  | 0.132514  | 2.298418  |
| H  | 0.66907   | -0.556134 | 3.011695  |
| O  | 2.675798  | -2.590509 | 1.824871  |
| H  | 2.314946  | -1.887481 | 2.411103  |
| H  | 3.974273  | -1.37874  | 1.117194  |
| H  | -2.277054 | -1.949281 | -0.438108 |
| Al | 3.278591  | 0.202166  | -0.366731 |
| Si | 1.105825  | -1.541982 | -1.669982 |

|                |         |         |         |
|----------------|---------|---------|---------|
| Frequencies -- | 30.9153 | 37.8275 | 43.5672 |
| Frequencies -- | 53.7344 | 55.7228 | 60.6355 |
| Frequencies -- | 64.4383 | 73.2046 | 77.5754 |

Zero-point correction= 0.273680 (Hartree/Particle)  
 Thermal correction to Energy= 0.309363  
 Thermal correction to Enthalpy= 0.310307  
 Thermal correction to Gibbs Free Energy= 0.208419  
 Sum of electronic and zero-point Energies= -2841.623514  
 Sum of electronic and thermal Energies= -2841.587831  
 Sum of electronic and thermal Enthalpies= -2841.586887  
 Sum of electronic and thermal Free Energies= -2841.688775

switch-4-RCT2-d3.log

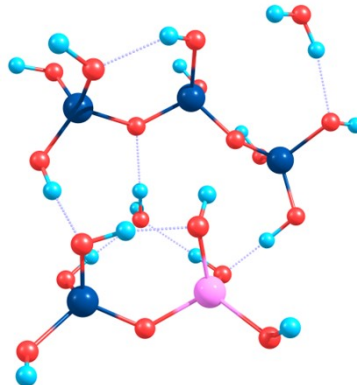

42

|    |           |           |           |
|----|-----------|-----------|-----------|
| O  | 3.586807  | 0.501884  | 1.563991  |
| O  | 2.836134  | 0.793616  | -1.038989 |
| O  | 5.370021  | 0.191582  | -0.271051 |
| O  | 3.353495  | -1.656248 | -0.098408 |
| O  | 1.859435  | -3.766576 | -1.461742 |
| O  | 0.871843  | -2.707979 | 1.017254  |
| O  | 0.911223  | -0.973972 | -1.346973 |
| O  | -5.126858 | 0.243482  | -1.399624 |
| O  | -0.607275 | 1.676071  | 0.44548   |
| O  | -3.111292 | 1.081308  | 1.370203  |
| O  | -2.71593  | 1.853934  | -1.207502 |
| O  | 1.793293  | 2.89718   | 0.168145  |
| O  | -0.235326 | 3.07486   | -1.690387 |
| O  | -0.402262 | 4.291184  | 0.781786  |
| H  | 0.82005   | -1.915039 | 1.585109  |
| H  | 5.651094  | -0.058685 | -1.161113 |
| H  | 0.053364  | -0.743308 | -0.960653 |
| H  | -3.41104  | 1.944871  | 1.685751  |
| H  | 0.019263  | 3.86042   | -2.193767 |
| H  | 0.124952  | 5.101989  | 0.769472  |
| H  | 2.672073  | 0.35893   | 1.892614  |
| H  | 2.028885  | 0.241398  | -1.277165 |
| H  | 1.590508  | -3.625776 | -2.377615 |
| Si | 3.768147  | -0.094785 | 0.03689   |
| Si | 0.195312  | 3.029617  | -0.085654 |
| H  | 2.23567   | 2.134867  | -0.302676 |
| O  | -1.501526 | -3.195799 | 0.221174  |
| O  | -1.852991 | -0.545509 | -0.227879 |
| O  | -3.828607 | -2.208136 | -0.653558 |
| O  | -2.973398 | -1.728023 | 1.922902  |
| H  | -3.271468 | -0.819357 | 2.102409  |
| H  | -4.381428 | 0.77592   | -1.718444 |
| H  | -4.734154 | -0.638138 | -1.268605 |
| H  | -2.040226 | 2.329377  | -1.730302 |
| H  | -4.445143 | -2.898061 | -0.371197 |
| O  | 0.923512  | -0.079203 | 2.076041  |
| H  | 0.563124  | 0.165386  | 2.94064   |
| H  | 0.440472  | 0.479005  | 1.436292  |
| H  | -0.566557 | -3.039323 | 0.606155  |
| Si | -2.529935 | -1.952657 | 0.349644  |
| Si | -2.090915 | 1.047132  | 0.080575  |
| Al | 1.742435  | -2.308772 | -0.489552 |

|                |         |         |         |
|----------------|---------|---------|---------|
| Frequencies -- | 22.1570 | 29.6914 | 40.7750 |
| Frequencies -- | 49.1975 | 51.5229 | 57.8354 |
| Frequencies -- | 62.2637 | 67.0943 | 72.4498 |

Zero-point correction= 0.270784 (Hartree/Particle)  
 Thermal correction to Energy= 0.307576  
 Thermal correction to Enthalpy= 0.308521  
 Thermal correction to Gibbs Free Energy= 0.203305  
 Sum of electronic and zero-point Energies= -2841.613505  
 Sum of electronic and thermal Energies= -2841.576713  
 Sum of electronic and thermal Enthalpies= -2841.575769  
 Sum of electronic and thermal Free Energies= -2841.680984

switch-4-TS3e-d3b.log

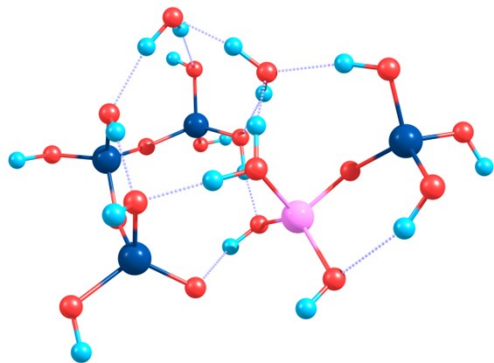

```

42
O      -3.9135   -1.279419  1.588962
O      -5.555526 -1.232159  -0.43211
O      -4.741221  1.128345  0.601287
O      -2.979061  -0.365344  -0.773973
O      -2.76409   2.436903  -0.993076
O      -1.175394  0.903675  0.922291
O      -0.540393  0.514275  -1.952533
O      1.089155   -2.430294  2.656088
O      2.841437   -1.243743  -0.679518
O      2.424965   -0.140095  1.763841
O      4.819455   -0.063725  0.455884
O      0.168033   -1.748093  -0.982382
O      2.143509   -2.890554  -2.525163
O      1.66207    -3.568706  0.091361
H      -0.375625  1.430845  1.199295
H      -4.21033   1.7943    0.114307
H      0.085698   1.279257  -1.85426
H      1.628403   -1.634515  2.462921
H      1.510734   -3.48464  -2.951736
H      2.47551    -4.091808  0.133822
H      -2.960282  -1.503139  1.64047
H      -6.035208  -0.724992  -1.10065
H      -2.275974  3.241941  -0.777498
Si     -4.26455   -0.418986  0.22371
Si     1.683606  -2.348488  -1.03712
H      -0.011499  -0.837625  -1.411684
O      0.483199   2.806993  -1.136597
O      2.710513   1.424397  -0.391624
O      2.554706   4.017656  0.233252
O      1.055391   2.199253  1.476213
H      1.86701    0.64539   1.954774
H      -0.393732  -1.902465  2.044235
H      1.309536   -3.017352  1.907021
H      5.209434   0.60444   1.036065
H      2.332908   4.755201  -0.350238
O      -1.138405  -1.591624  1.45546
H      -0.834056  -1.8443   0.555663
H      -1.088709  -0.057172  1.256923
Si     1.635773   2.666211  -0.074246
Si     3.183001   0.02115   0.299695
Al     -1.823222   0.963261  -0.827903
H      0.9797    2.923886  2.113474

Frequencies --  -43.4060    27.9476    32.6088
Frequencies --   41.4575    45.0137    57.8075
Frequencies --   58.9542    68.5086    73.7133

Zero-point correction=      0.273711 (Hartree/Particle)
Thermal correction to Energy=  0.307867
Thermal correction to Enthalpy= 0.308811
Thermal correction to Gibbs Free Energy= 0.209858
Sum of electronic and zero-point Energies= -2841.605317
Sum of electronic and thermal Energies= -2841.571161
Sum of electronic and thermal Enthalpies= -2841.570217
Sum of electronic and thermal Free Energies= -2841.669170
    
```

switch-4-INT2d-d3.log

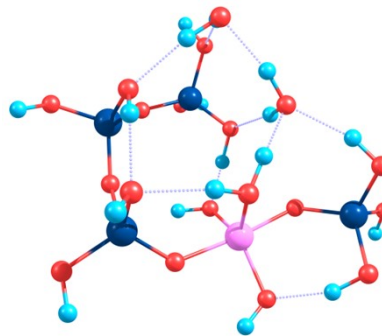

```

42
O      -3.774447  -1.269693  1.644595
O      -4.959032  -1.689403  -0.640518
O      -4.741613  0.857421  0.277303
O      -2.545791  -0.409992  -0.627597
O      -2.8879    2.163301  -1.171246
O      -1.171937  0.866422  1.176754
O      -0.387171  0.222019  -1.880107
O      1.358099   -2.242435  2.774439
O      2.739037   -1.083745  -0.746445
O      2.516972   0.079867  1.678003
O      4.630847   0.494982  -0.020995
O      0.175782   -1.996033  -0.848702
O      2.238654   -3.000335  -2.381067
O      1.981217   -3.482693  0.302081
H      -0.447145  1.382996  1.586073
H      -4.195336  1.518528  -0.224498
H      0.433648   0.709057  -2.029865
H      1.815887   -1.420391  2.503489
H      1.68463    -3.717254  -2.719171
H      2.856096   -3.89601   0.320927
H      -2.845492  -1.543698  1.783212
H      -5.212201  -1.401211  -1.527673
H      -2.650913  3.095808  -1.095441
Si     -3.95213   -0.599608  0.13397
Si     1.752414   -2.387133  -0.927634
H      -0.066849  -1.086516  -1.30361
O      -0.312478  2.592308  -0.646807
O      2.188554   1.548707  -0.541987
O      1.878958   4.170059  -0.2556
O      1.082724   2.399625  1.663244
H      2.024079   0.862171  2.004553
H      -0.211464  -1.897141  2.190728
H      1.605889   -2.858574  2.057514
H      4.978696   1.287513  0.410219
H      1.273697   4.884292  -0.49714
O      -1.010933  -1.669326  1.643692
H      -0.742796  -1.902556  0.726662
H      -1.091888  -0.105705  1.449335
Si     1.138805   2.717234  -0.002587
Si     3.005052   0.278164  0.108208
Al     -1.493664  1.107412  -0.726627
H      0.994782   3.162689  2.251138

Frequencies --  37.4929    39.1676    42.9589
Frequencies --  50.7211    56.6334    68.8351
Frequencies --  72.5122    77.4218    89.1701

Zero-point correction=      0.274894 (Hartree/Particle)
Thermal correction to Energy=  0.309312
Thermal correction to Enthalpy= 0.310256
Thermal correction to Gibbs Free Energy= 0.212035
Sum of electronic and zero-point Energies= -2841.622522
Sum of electronic and thermal Energies= -2841.588104
Sum of electronic and thermal Enthalpies= -2841.587160
Sum of electronic and thermal Free Energies= -2841.685381
    
```

switch-4-TS4-d3d.log

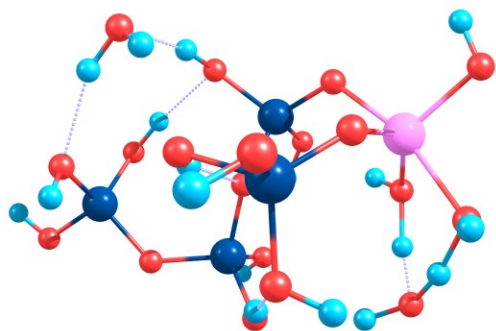

```

42
O      3.905495 -0.491483  0.903347
O      2.298734 -2.161978 -0.032551
O      4.203698 -0.637139 -1.856557
O      2.489509  1.301115 -0.372015
O      2.164796  3.757444  0.543329
O      -0.036979 2.371062 -0.020464
O      1.350727  1.640322  2.083033
O      -0.209589 -2.64637  -1.472652
O      -2.650349 -0.334772  1.454934
O      -0.207409 -0.511492  2.609964
O      -1.18787  -2.607438  1.226685
O      -3.195637  1.733413 -0.204623
O      -3.59142  -0.734077 -1.104445
O      -5.138222  0.116762  0.911075
H      -0.460844  1.493335 -0.040513
H      0.281541  0.338896  2.470418
H      -2.820441 -0.623757 -1.707148
H      -5.867049  0.363409  0.325151
Si     1.536712  2.225882  0.507238
Si     -1.130297 -0.960633  1.334737
H      1.658613  4.384451  1.077567
Si     -3.641022  0.194928  0.239079
O      -1.254863 -0.440888 -2.592342
H      -1.28917  0.556614 -2.655271
O      -0.460466 -0.39002  -0.051168
O      1.416905 -0.550599 -1.96738
O      -1.524075  2.21264  -2.456647
H      -2.254442  2.147216 -1.809376
H      -1.986273 -3.034691  1.566226
H      -0.782644  2.500439 -1.892711
O      2.540038 -1.858421  2.319093
H      2.291011 -2.180462  1.143983
H      3.876875 -0.633914 -2.764732
H      -2.833506  2.285815  0.503097
H      3.276766 -1.06732  1.775261
H      1.744882 -1.384577  2.614744
H      1.565979 -2.635217 -0.45661
H      4.117534  0.414297  1.159999
H      2.180764  1.338422  2.479908
H      -0.733132 -2.938483 -0.704448
Al     2.839457 -0.464835 -0.731108
Si     -0.064221 -0.990625 -1.577202

```

```

Frequencies -- -1208.1165    42.3936    44.1189
Frequencies --   63.3319    67.5041    70.7550
Frequencies --   80.7354    88.4800    91.9720

```

```

Zero-point correction=      0.270039 (Hartree/Particle)
Thermal correction to Energy=      0.303513
Thermal correction to Enthalpy=     0.304457
Thermal correction to Gibbs Free Energy=      0.209395
Sum of electronic and zero-point Energies= -2841.612545
Sum of electronic and thermal Energies= -2841.579071
Sum of electronic and thermal Enthalpies= -2841.578127
Sum of electronic and thermal Free Energies= -2841.673190

```

switch-4-PRD2-d3g.log

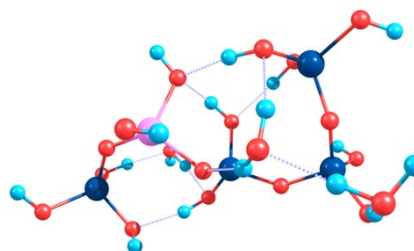

```

42
O      -3.542051 -2.663974 -0.330887
O      -3.329471 -1.111009 -2.441106
O      -3.005794 -0.001839 -0.047524
O      -4.381288  1.225151  1.912811
O      -2.484124 -0.577522  2.539657
O      -0.0245  -1.175245  1.399529
O      2.955325  -2.628369  1.706396
O      3.228288  1.146039  0.397699
O      0.712925  1.376376  1.842549
O      1.364534  3.174098 -0.45335
O      4.875223 -1.004131  0.691796
O      3.544029 -0.714428 -1.575282
O      5.544304  0.963668 -0.975834
O      -1.646616 -1.012524  2.275041
H      -3.419962 -0.142618 -2.67049
H      -2.740838  1.845534 -2.355436
H      1.110338  1.777499  2.6258
H      3.151669 -0.151809 -2.258619
H      5.664201  1.843312 -0.59374
Si     -2.919629  0.604743  1.481434
Si     -5.143572  0.708528  1.61817
Si     -2.74468  -1.356722 -0.941465
Si     4.269681  0.135469 -0.317708
O      4.198565 -1.592032  1.11649
O      0.623586  0.372571 -0.711763
O      -1.348022  2.302709 -1.364833
O      -1.128257 -1.693847 -0.970074
O      1.447595 -2.204514 -0.623664
H      2.207809 -1.762969 -1.072976
H      3.347282 -3.513521  1.708544
H      2.355184 -2.627797  0.930491
H      0.495096  3.283375 -0.868714
H      -3.100931 -3.099976  0.410847
O      -3.522485  1.508746 -2.858537
H      -4.277  1.746488 -2.300407
H      -1.686196  2.289475 -0.446895
O      -1.890855  1.890421  1.466487
H      -0.938562  1.713818  1.704007
H      0.340624 -0.353446  1.814621
Si     0.238529 -1.135116 -0.246362
Al     1.533519  1.58353  0.250281
H      -0.779131  1.506325 -1.385536

```

```

Frequencies --  19.8129    31.2603    39.2229
Frequencies --  46.4418    57.9558    60.7917
Frequencies --  71.1998    73.0328    79.8920

```

```

Zero-point correction=      0.275094 (Hartree/Particle)
Thermal correction to Energy=      0.310578
Thermal correction to Enthalpy=     0.311522
Thermal correction to Gibbs Free Energy=      0.209468
Sum of electronic and zero-point Energies= -2841.638504
Sum of electronic and thermal Energies= -2841.603020
Sum of electronic and thermal Enthalpies= -2841.602076
Sum of electronic and thermal Free Energies= -2841.704130

```

# CAM-B3LYP

## Anionic Si

### Bondi-Si-RCT1-CAMhighb.log

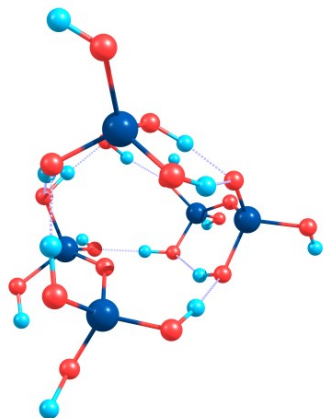

```

41
O      -2.410463  -3.282252  -0.348473
O      0.256108   -2.898194  -0.862408
O     -1.666503   -1.443294  -2.082026
O     -1.052461   -1.15355   0.529447
O     -3.356091   0.001774   1.340508
O     -2.441787   -2.241924  2.427264
O     -1.130222   0.109439   2.866185
O      0.938246   2.399228   0.472781
O      3.064841   0.771342   0.109126
O      1.421477   0.251428   2.105946
O      2.949757   2.449065   2.191344
O      4.868354   -1.048575  -0.291876
O      2.32766    -1.758432  0.356036
O      2.819905   -0.832699  -2.067432
H     -3.195729  -2.284929  3.023609
H     -0.899692  -1.026342  -2.585296
H     -0.172496  0.208748   2.649658
H      1.582695   -0.621145  1.704236
H      3.618693   1.989192   2.707028
H      1.597463   -2.222347  -0.110367
H      3.397626   -0.417715  -2.718202
H     -2.595143  -3.371985  0.59823
H      0.420059   -3.50546   -1.592163
Si     -2.000185  -0.771798  1.817847
Si      2.032015   1.513515   1.184964
H     -3.28598    0.451786   0.476404
H      0.333553   2.145441  -0.947486
Si     -1.23417   -2.204768  -0.707231
Si      3.276962  -0.723953  -0.483778
H      5.176387   -1.923647  -0.548931
O     -2.798104   0.953966  -1.203256
H     -2.42604    0.142471  -1.602063
O     -0.350252   2.02256   -1.690906
O     -2.633427   3.541389  -1.771693
H     -3.116856   3.348686  -2.580476
O     -1.654009   2.685336   0.517981
H     -0.690085   2.610742   0.759124
O      0.312252   -0.175432  -3.144015
H      0.128867   0.672153  -2.68332
H      1.155478   -0.488283  -2.769162
Si     -1.842554   2.292947  -1.05588

```

```

Frequencies -- 34.6537    40.8047    50.0038
Frequencies -- 53.8102    60.2415    66.4083
Frequencies -- 68.2812    74.7637    85.3556

```

```

Zero-point correction=      0.265191 (Hartree/Particle)
Thermal correction to Energy= 0.298632
Thermal correction to Enthalpy= 0.299576
Thermal correction to Gibbs Free Energy= 0.202579
Sum of electronic and zero-point Energies= -2888.177292
Sum of electronic and thermal Energies= -2888.143851
Sum of electronic and thermal Enthalpies= -2888.142907
Sum of electronic and thermal Free Energies= -2888.239904

```

### Bondi-Si-TS1freqb-CAMhighb.log

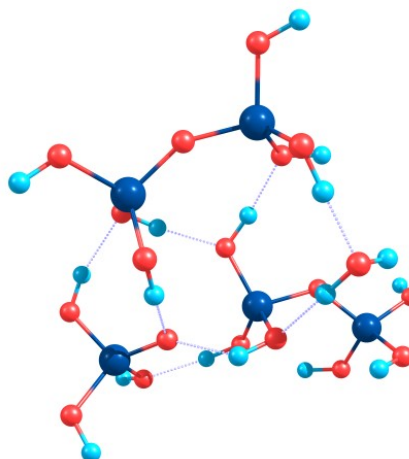

```

41
O      0.004583  -0.038354  -1.160094
O     -1.856895  1.976849  -0.8237
O     -1.226052  0.363124  1.383862
O      0.563283  1.968285  0.683615
O      1.607764  4.425993  1.34681
O      2.429021  3.283172  -0.814764
O     -0.162103  4.064453  -0.67067
O      4.651231  -0.414167  0.100931
O      2.60347   -1.931045  -0.323354
O      2.608059  0.550081  -1.334642
O      2.30446   0.189792  1.311921
O      0.268399  -2.703797  -1.165429
O      2.346769  -4.449225  -0.797351
O      1.038616  -3.466054  1.30645
H      2.627978  2.375294  -1.107679
H     -0.570495  0.995812  1.730727
H      0.036362  4.730742  -1.335286
H      1.637011  0.490688  -1.472654
H      1.614218  0.905641  1.123548
H      1.921915  -5.307859  -0.710538
H      0.218697  -3.008315  1.62521
H     -0.019349  -1.01215  -1.289693
H     -1.306766  2.788007  -0.799864
Si      1.112281  3.371505  0.170681
Si      3.019055  -0.379001  -0.029763
H      0.963859  4.614292  2.035869
H      5.077967  0.377849  0.440954
Si     -1.2386   0.563906  -0.269052
Si      1.545573  -3.152636  -0.201176
H     -0.532393  -3.238459  -1.132521
O     -4.986532  -1.518614  -0.876926
H     -5.172354  -1.402685  -1.813436
O     -2.481309  -0.494827  -0.629312
O     -4.577141  1.117006  -0.510764
H     -3.850499  1.729523  -0.711792
O     -4.172539  -0.764855  1.437784
H     -3.455982  -0.418607  1.982228
O     -1.16912   -2.262637  2.120302
H     -1.940396  -2.573594  1.63314
H     -1.13621  -1.300416  1.939301

```

```

Frequencies -- -124.9361    26.0658    33.4627
Frequencies -- 37.8110    43.1313    48.9599
Frequencies -- 58.4262    61.7659    69.2394

```

```

Zero-point correction=      0.265221 (Hartree/Particle)
Thermal correction to Energy= 0.298989
Thermal correction to Enthalpy= 0.299933
Thermal correction to Gibbs Free Energy= 0.200627
Sum of electronic and zero-point Energies= -2888.165275
Sum of electronic and thermal Energies= -2888.131507
Sum of electronic and thermal Enthalpies= -2888.130563
Sum of electronic and thermal Free Energies= -2888.229869

```

### Bondi-Si-INT-CAMhighb.log

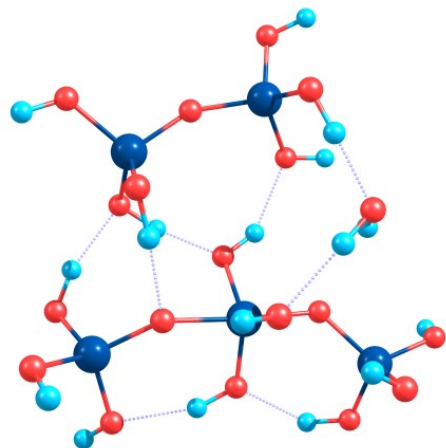

```

41
O      0.089008  -0.053676  -1.019996
O      -2.362002  1.484173   -0.782567
O      -1.356361  0.089682   1.576795
O      -0.152552  1.872975   0.428515
O      0.643795  4.250265   1.394183
O      1.349248  3.607266  -1.037613
O      -1.264296  4.020991  -0.535253
O      4.604893  0.703627   0.208318
O      3.011186  -1.287024  -0.23391
O      2.41601   1.091841  -1.305433
O      2.175363  0.734999   1.352745
O      1.020473  -2.636283  -1.268335
O      3.424655  -3.792456  -0.653795
O      1.719443  -3.131692  1.290764
H      1.879967  2.803803  -1.205817
H      -0.941688  0.736211  2.156339
H      -1.241194  4.799724  -1.099695
H      1.498544  0.742979  -1.441949
H      1.296411  1.122668  1.159563
H      3.225578  -4.728534  -0.556814
H      0.762674  -2.93673  1.46109
H      0.067095  -0.989729  -1.273877
H      -2.179922  2.437332  -0.764698
Si     0.15685   3.415009  0.063796
Si     3.026981  0.32074   0.019
H      0.076212  4.193146  2.169086
H      4.806162  1.592772  0.515884
Si     -1.195826  0.495838  -0.080044
Si     2.269865  -2.729476  -0.183706
H      0.465761  -3.416871  -1.371636
O      -4.206021  -2.703955  -0.524469
H      -4.210618  -2.939605  -1.456957
O      -2.131712  -0.946562  -0.460328
O      -4.605307  -0.11578  -1.033622
H      -4.069136  0.688002  -1.158481
O      -3.979832  -1.032069  1.463997
H      -3.206211  -0.633766  1.893864
O      -0.865011  -2.612077  1.547073
H      -1.177073  -2.608719  0.630971

Frequencies -- 19.3005    25.4514    36.9296
Frequencies -- 40.0520    55.8106    57.4804
Frequencies -- 70.3159    74.0295    80.9330

Zero-point correction=      0.266976 (Hartree/Particle)
Thermal correction to Energy= 0.301069
Thermal correction to Enthalpy= 0.302013
Thermal correction to Gibbs Free Energy= 0.202162
Sum of electronic and zero-point Energies= -2888.176407
Sum of electronic and thermal Energies= -2888.142315
Sum of electronic and thermal Enthalpies= -2888.141370
Sum of electronic and thermal Free Energies= -2888.241222
    
```

### Bondi-Si-TS2-D3d-CAMhighb.log

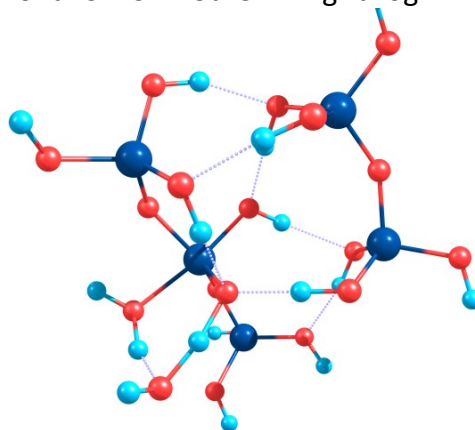

```

41
O      0.048729  0.039094  -1.245262
O      -2.31314  2.331814  0.35797
O      -0.686865  0.51972  1.211082
O      -0.135708  2.406383  -0.752161
O      1.629578  1.935678  1.178169
O      2.550574  2.744512  -1.193461
O      1.140886  4.464357  0.233116
O      4.623125  -1.633021  -0.78818
O      2.201835  -2.223658  -0.101669
O      2.60477   0.020187  -1.494104
O      3.441933  -0.110711  1.058467
O      -0.297886  -2.722821  -0.701527
O      1.113455  -4.243701  1.077708
O      0.277401  -1.815526  1.778579
H      2.77289   1.818183  -1.41432
H      -1.421638  0.968863  2.042143
H      1.931553  4.930965  0.521135
H      1.599329  0.044329  -1.497157
H      2.866137  0.674081  1.16809
H      0.411562  -4.696971  1.554133
H      -0.102874  -0.915485  1.558762
H      -0.231926  -0.884365  -1.325521
H      -1.947472  3.218902  0.27019
Si     1.302215  2.8796   -0.148364
Si     3.207338  -0.958067  -0.319335
H      0.848824  1.397198  1.449536
H      5.382085  -1.048468  -0.873555
Si     -1.037107  1.035028  -0.322836
Si     0.78742  -2.728271  0.538056
H      -1.24819  -2.635995  -0.478141
O      -2.907041  -2.160771  -0.231915
H      -3.476633  -2.833848  0.155791
O      -2.377273  0.299171  -1.025613
O      -4.550849  -0.995465  -1.912589
H      -5.048704  -0.254662  -2.272504
O      -4.393165  -0.057655  0.640721
H      -5.088498  -0.587237  1.043192
O      -2.287684  1.583649  2.630167

Frequencies -- -1250.2500    27.6218    37.6242
Frequencies -- 42.6682    50.5735    59.7337
Frequencies -- 67.1712    77.1885    81.4622

Zero-point correction=      0.259587 (Hartree/Particle)
Thermal correction to Energy= 0.292317
Thermal correction to Enthalpy= 0.293261
Thermal correction to Gibbs Free Energy= 0.197203
Sum of electronic and zero-point Energies= -2888.150434
Sum of electronic and thermal Energies= -2888.117704
Sum of electronic and thermal Enthalpies= -2888.116760
Sum of electronic and thermal Free Energies= -2888.212818
    
```



### Bondi-Si-PRD1-CAMhighb.log

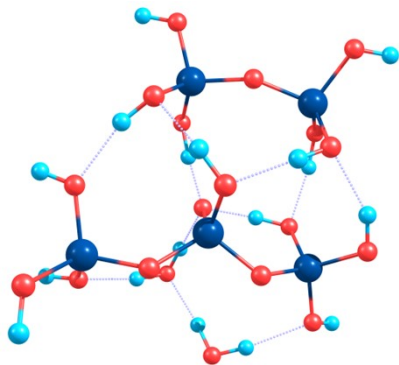

41

|    |           |           |           |
|----|-----------|-----------|-----------|
| O  | 0.152716  | -0.360219 | -1.718888 |
| O  | -3.23126  | 3.088006  | 0.796617  |
| O  | -0.483775 | 0.028904  | 0.931577  |
| O  | -0.707537 | 1.937474  | -0.897172 |
| O  | 0.87856   | 2.245836  | 1.219557  |
| O  | 1.551198  | 3.433445  | -1.088627 |
| O  | -0.628787 | 4.295097  | 0.189396  |
| O  | 4.903734  | -0.270085 | -0.595422 |
| O  | 2.678697  | -1.484559 | -0.085743 |
| O  | 2.55082   | 0.826502  | -1.406461 |
| O  | 3.265284  | 0.866511  | 1.165087  |
| O  | 0.524865  | -2.842859 | -0.672634 |
| O  | 2.492582  | -3.866084 | 0.915972  |
| O  | 0.840864  | -1.965669 | 1.852597  |
| H  | 2.115251  | 2.673459  | -1.325722 |
| H  | -1.782268 | 0.553435  | 1.972892  |
| H  | -0.26046  | 5.010626  | 0.71719   |
| H  | 1.72886   | 0.393686  | -1.728166 |
| H  | 2.486416  | 1.450654  | 1.258493  |
| H  | 2.02111   | -4.634617 | 1.251453  |
| H  | 0.267203  | -1.178954 | 1.600277  |
| H  | 0.31067   | -1.317229 | -1.59264  |
| H  | -2.4167   | 3.579976  | 0.625586  |
| Si | 0.302208  | 2.986998  | -0.138513 |
| Si | 3.335668  | -0.00177  | -0.214575 |
| H  | 0.386632  | 1.3883    | 1.366359  |
| H  | 5.490914  | 0.491713  | -0.613945 |
| Si | -0.859572 | 0.323489  | -0.59181  |
| Si | 1.608753  | -2.541002 | 0.544353  |
| H  | -0.414198 | -2.961872 | -0.435121 |
| O  | -2.244277 | -2.706051 | -0.264289 |
| H  | -2.604646 | -3.519443 | 0.106738  |
| O  | -2.392151 | -0.162865 | -0.9539   |
| O  | -4.294095 | -1.913503 | -1.721661 |
| H  | -4.993062 | -1.306634 | -1.987066 |
| O  | -4.091938 | -1.016954 | 0.839048  |
| H  | -4.69292  | -1.65173  | 1.243837  |

  

|                |         |         |         |
|----------------|---------|---------|---------|
| Frequencies -- | 31.3849 | 41.2130 | 49.3708 |
| Frequencies -- | 50.7612 | 55.4922 | 61.7436 |
| Frequencies -- | 79.9100 | 85.6138 | 93.5894 |

Zero-point correction= 0.266359 (Hartree/Particle)  
 Thermal correction to Energy= 0.300428  
 Thermal correction to Enthalpy= 0.301373  
 Thermal correction to Gibbs Free Energy= 0.203032  
 Sum of electronic and zero-point Energies= -2888.179259  
 Sum of electronic and thermal Energies= -2888.145190  
 Sum of electronic and thermal Enthalpies= -2888.144245  
 Sum of electronic and thermal Free Energies= -2888.242586

### Bondi-Si-RCT2-CAMhighb.log

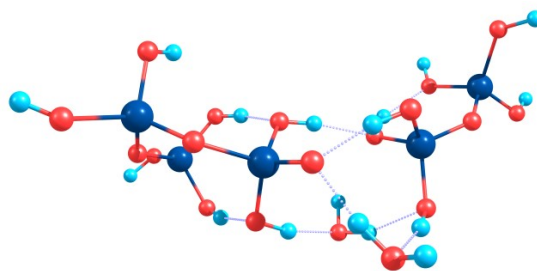

41

|    |           |           |           |
|----|-----------|-----------|-----------|
| O  | 2.698423  | 1.574834  | 1.518066  |
| O  | 1.911048  | -0.691216 | 0.40339   |
| O  | 2.270176  | 1.505903  | -1.149476 |
| O  | 4.353067  | 0.222701  | -0.112637 |
| O  | 5.535441  | -1.174891 | -2.137525 |
| O  | 6.427674  | -1.215867 | 0.437078  |
| O  | 4.032698  | -2.34082  | -0.324976 |
| O  | 0.591633  | 0.269297  | 2.838263  |
| O  | -4.438645 | -0.407586 | -0.021976 |
| O  | -3.593951 | -0.572247 | -2.550398 |
| O  | -5.040409 | 1.537501  | -1.798592 |
| O  | -4.784113 | -2.819932 | 1.164084  |
| O  | -2.581973 | -2.308865 | -0.114157 |
| O  | -3.140234 | -0.987947 | 2.221431  |
| H  | 7.07032   | -1.917268 | 0.290502  |
| H  | 1.32062   | 1.831704  | -1.02416  |
| H  | 4.117869  | -3.166597 | -0.811424 |
| H  | -3.191106 | -1.408774 | -2.287586 |
| H  | -1.781636 | -1.755053 | -0.25171  |
| H  | -2.647966 | -0.148686 | 2.095742  |
| H  | 2.267384  | 2.47107   | 1.42271   |
| H  | 2.377031  | -1.514572 | 0.173964  |
| Si | 5.133181  | -1.138172 | -0.554818 |
| Si | -3.920327 | 0.458528  | -1.315301 |
| H  | 6.212114  | -0.567009 | -2.45263  |
| H  | 2.805633  | 0.690781  | 0.145052  |
| Si | -3.726914 | -1.62298  | 0.836963  |
| H  | -5.584733 | -2.593662 | 1.646968  |
| O  | -1.585223 | 1.170276  | 1.510836  |
| H  | -0.813543 | 0.951209  | 2.086117  |
| O  | -2.616242 | 1.328912  | -0.889594 |
| O  | -0.094333 | 2.253353  | -0.505526 |
| O  | -0.695899 | -0.394994 | -0.470453 |
| H  | 0.223042  | -0.611774 | -0.214704 |
| H  | 0.730969  | -0.533081 | 2.317616  |

  

|                |         |         |         |
|----------------|---------|---------|---------|
| Frequencies -- | 18.3091 | 22.4987 | 27.8662 |
| Frequencies -- | 34.6621 | 35.7885 | 46.5917 |
| Frequencies -- | 53.3260 | 68.5050 | 70.3060 |

  

Zero-point correction= 0.264880 (Hartree/Particle)  
 Thermal correction to Energy= 0.299594  
 Thermal correction to Enthalpy= 0.300538  
 Thermal correction to Gibbs Free Energy= 0.197552  
 Sum of electronic and zero-point Energies= -2888.170590  
 Sum of electronic and thermal Energies= -2888.135875  
 Sum of electronic and thermal Enthalpies= -2888.134931  
 Sum of electronic and thermal Free Energies= -2888.237917

## Bondi-Si-INT2-CAMhighb.log

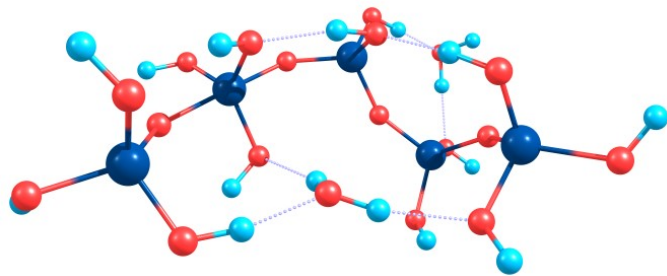

```

41
O      1.506442  0.765568  1.440349
O      1.992714  0.610077  -1.46595
O      2.99076   2.897286  0.065203
O      3.719518  0.55654   0.354703
O      3.425377  -2.068438  0.993617
O      4.199783  -1.384414  -1.434178
O      5.850905  -1.038319  0.634366
O      -4.208952  3.048755  -0.23794
O      -3.264164  -0.825234  0.052751
O      -3.909852  1.131042  1.786945
O      -2.138668  -0.768425  2.468586
O      -1.964477  -1.789128  -2.058949
O      -1.790655  -2.90924   0.449495
O      -3.958255  -3.227925  -1.019268
H      4.83441   -0.962955  -2.023145
H      3.928855  2.755063  0.21883
H      6.118805  -0.403196  1.30537
H      -4.679322  0.72881   2.203636
H      -1.672471  -3.864893  0.412123
H      -4.495941  -3.065571  -1.800728
H      2.178983  0.306987  1.953133
H      2.680268  -0.031276  -1.686279
Si     4.276966  -0.942838  0.166738
Si     -2.710574  0.151537  1.243172
H      2.453284  -2.085265  0.848808
Si     2.183471  1.42841   0.020854
Si     -2.748364  -2.186732  -0.696004
H      -1.476955  -0.931346  -2.022128
O      -0.638636  0.516973  -1.769382
H      0.326707  0.352118  -1.885184
O      -1.58732  1.151058  0.657037
O      0.668116  2.267536  -0.279777
O      -1.718109  2.948365  -1.276087
H      -2.627614  3.031387  -0.908104
H      -4.796494  2.574441  -0.837169
H      -4.202501  2.50994   0.573705

Frequencies --  21.5015      29.6744      34.6417
Frequencies --  43.7905      53.6359      61.0921
Frequencies --  71.2300      74.9332      77.1537

Zero-point correction=          0.267911 (Hartree/Particle)
Thermal correction to Energy=    0.301943
Thermal correction to Enthalpy=  0.302888
Thermal correction to Gibbs Free Energy=  0.203757
Sum of electronic and zero-point Energies= -2888.170521
Sum of electronic and thermal Energies= -2888.136488
Sum of electronic and thermal Enthalpies= -2888.135544
Sum of electronic and thermal Free Energies= -2888.234675

```

## Bondi-Si-TS4f-CAMhighb.log

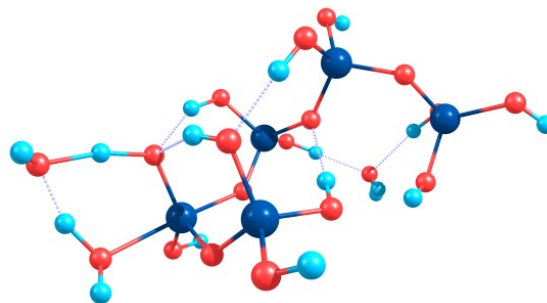

```

41
Si5H17O19
O      4.762944  0.325555  -0.654416
O      3.011242  -0.67194  0.89428
O      3.576258  -1.382488  -1.92486
O      2.472646  1.174923  -1.145587
O      1.592446  3.587535  -0.604167
O      -0.217001  1.680508  -0.946206
O      1.348071  1.560677  1.219543
O      0.984853  -2.348234  1.37095
O      -3.076427  0.625971  1.021144
O      -0.90398  0.897618  2.576283
O      -2.2354  -1.337652  2.664245
O      -2.861253  0.942746  -1.650921
O      -4.57209  -0.804746  -0.740334
O      -5.039754  1.773736  -0.181527
H      -0.493326  0.77671   -0.709257
H      -0.081662  1.228162  2.15495
H      -3.994337  -1.403433  -1.250393
H      -5.650823  1.926728  -0.909048
Si     1.296836  1.999389  -0.382994
Si     -1.775153  -0.127441  1.668023
H      0.909015  4.214885  -0.348761
Si     2.945592  -0.399148  -0.736745
Si     -3.88855  0.637163  -0.397422
O      -0.525518  -3.035819  -0.710243
H      -1.25336  -2.735269  -1.292183
O      -0.89925  -0.659202  0.387133
O      1.32379  -1.049412  -0.934957
O      -2.476707  -1.826329  -2.223733
H      -2.276904  -0.877063  -2.303607
H      -2.865417  -1.982666  2.328166
H      -2.628791  -2.143514  -3.121866
O      5.138854  0.045207  1.71591
H      4.014854  -0.369553  1.427672
H      2.888553  -1.963486  -2.26473
H      -2.150004  1.588784  -1.530862

Frequencies -- -1033.1083      27.2715      32.0430
Frequencies --  44.5207      48.9944      55.6892
Frequencies --  60.9553      71.0551      89.0957

Zero-point correction=          0.262607 (Hartree/Particle)
Thermal correction to Energy=    0.295010
Thermal correction to Enthalpy=  0.295954
Thermal correction to Gibbs Free Energy=  0.201186
Sum of electronic and zero-point Energies= -2888.154156
Sum of electronic and thermal Energies= -2888.121754
Sum of electronic and thermal Enthalpies= -2888.120809
Sum of electronic and thermal Free Energies= -2888.215577

```

## Bondi-Si-PRD2-CAMhighb.log

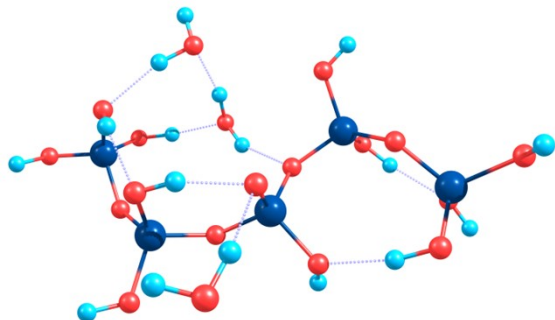

```

41
O      2.343185  1.551181  1.217974
O      1.645802 -2.628301  1.937111
O      2.737346  3.043649 -1.064743
O      3.582839  0.525574 -0.867885
O      5.857301 -0.817723 -0.334953
O      3.729914 -0.860673  1.373821
O      3.776304 -2.173223 -0.996449
O      0.365393  3.982183  1.354255
O      -3.328192 -0.613825  0.619737
O      -1.619329 -2.657021  1.067849
O      -2.775312 -2.34149  -1.333578
O      -4.187762  1.833149 -0.064854
O      -4.902701 -0.462017 -1.404311
O      -5.914271  0.10402  0.981117
H      3.308298 -0.024443  1.65115
H      3.581611  3.449074 -0.842305
H      2.80032  -2.350376 -1.011085
H      -2.227412 -3.345922  1.354124
H      -5.498863 -0.036326 -2.027885
H      -5.92983  0.575712  1.819567
Si     4.228803 -0.8367  -0.205287
Si     -2.165893 -1.575807 -0.022056
H      6.333145 -0.121275  0.127456
Si     2.408491  1.576113 -0.431299
Si     -4.589536  0.260307  0.042764
H      -3.270473  1.992961 -0.373133
O      -1.614668  1.859535 -0.941342
H      -1.613991  1.824092 -1.904471
O      -0.877478 -0.653251 -0.421569
O      0.95348  1.11927  -1.013317
O      -0.292765  1.348228  1.350705
H      1.291235  3.903134  1.604642
H      0.022651  3.065391  1.449238
H      -3.547373 -1.893915 -1.715543

```

```

Frequencies -- 14.9297    27.2657    32.2508
Frequencies -- 37.2042    45.0666    50.7023
Frequencies -- 51.9581    56.6458    60.2091

```

```

Zero-point correction=      0.264478 (Hartree/Particle)
Thermal correction to Energy= 0.300359
Thermal correction to Enthalpy= 0.301304
Thermal correction to Gibbs Free Energy= 0.196295
Sum of electronic and zero-point Energies= -2888.162563
Sum of electronic and thermal Energies= -2888.126681
Sum of electronic and thermal Enthalpies= -2888.125737
Sum of electronic and thermal Free Energies= -2888.230746

```

## Anionic Q1 CAM-B3LYP Switch-4-RCT1-CAMhighd2.log

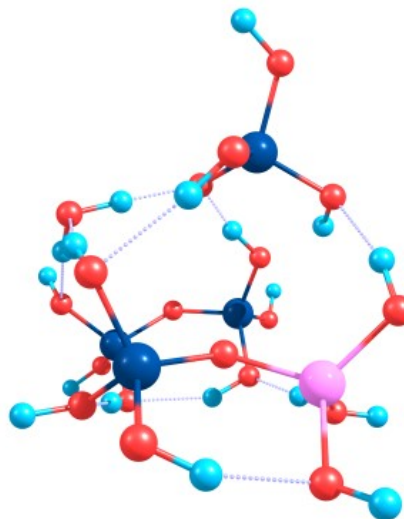

```

42
O      -2.244935  -3.244398  -0.761602
O      0.39286  -2.672148  -1.147502
O      -1.543867 -1.260515  -2.361055
O      -1.096242 -1.079063  0.307981
O      -3.332784  0.2083  1.856917
O      -2.810881 -2.64837  1.861982
O      -0.841968 -0.787408  3.016547
O      0.736636  2.182082  0.905603
O      2.962112  0.864265  0.210323
O      1.459528 -0.168535  2.119722
O      2.751052  2.029874  2.648556
O      4.973992 -0.691839 -0.31465
O      2.514708 -1.742225  0.096777
O      2.980603 -0.441599 -2.159614
H      -3.708395 -2.753723  2.186129
H      -0.790116 -0.716252 -2.741978
H      0.086017 -0.509502  2.7212
H      1.752648 -0.949255  1.607733
H      1.735909 -2.108546 -0.391948
H      3.505961  0.141234 -2.719623
H      -2.565605 -3.26784  0.166252
H      0.569795 -3.233401 -1.910035
H      -3.067186  1.054435  1.4601
Si     -1.144354 -2.046312 -0.979002
Si     3.370428 -0.515554 -0.562757
H      5.393044 -1.485966 -0.662233
O      -2.877065  1.115586 -1.594023
H      -2.460553  0.262221 -1.806287
O      -0.335306  2.075487 -1.314382
O      -2.541301  3.720152 -1.524386
H      -2.646238  3.797904 -2.477075
O      -2.101692  2.391941  0.661045
H      -1.251558  2.397002  1.128203
O      0.396306  0.299105 -3.080478
H      0.166901  1.014049 -2.419112
H      1.251828 -0.055765 -2.789345
Si     -1.886571  2.289809 -0.995397
H      2.927987  2.968752  2.533718
H      0.381898  2.108415 -0.086296
Al     -2.141049 -1.031925  1.709731
Si     1.94902  1.272718  1.440345
H      -1.022086 -0.463514  3.907376

```

```

Frequencies -- 34.3052    41.7932    51.0259
Frequencies -- 52.9620    56.3121    57.5068
Frequencies -- 67.3850    70.8678    76.8622

```

```

Zero-point correction=      0.273514 (Hartree/Particle)
Thermal correction to Energy= 0.307974
Thermal correction to Enthalpy= 0.308918
Thermal correction to Gibbs Free Energy= 0.209785
Sum of electronic and zero-point Energies= -2841.729071
Sum of electronic and thermal Energies= -2841.694612
Sum of electronic and thermal Enthalpies= -2841.693668
Sum of electronic and thermal Free Energies= -2841.792801

```

### Switch-4-TS1-CAMhighB.log

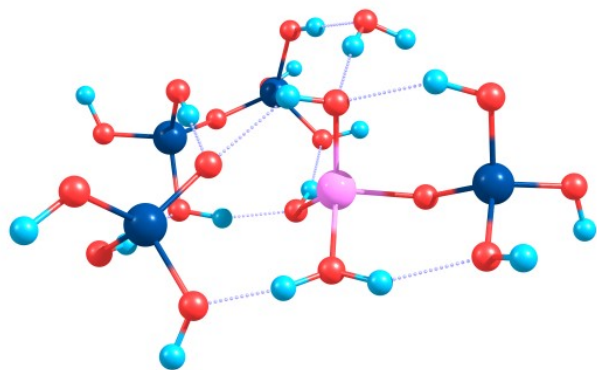

```

42
O      0.054317  -0.253287  -1.48027
O     -2.241529  1.453492  -1.034597
O     -1.31308   -0.189657  1.31437
O      0.064202  1.981727  0.880993
O      0.232349  4.586964  1.493553
O      1.530154  3.699937  -0.658565
O     -1.150111  3.741249  -0.667277
O      4.48627   1.120183  -0.020106
O      3.206276  -1.187197  -0.369155
O      2.277819  1.128366  -1.369621
O      2.154074  0.600958  1.290476
O      1.265392  -2.724474  -1.168416
O      3.772685  -3.68686   -0.626229
O      2.141787  -3.008775  1.36872
H      1.863877   2.876544  -1.064886
H     -0.851878  0.613964  1.619032
H     -1.011356  4.288356  -1.447639
H      1.394353  0.699889  -1.541863
H      1.318596  1.175048  1.181124
H      3.649846  -4.622173  -0.438596
H      1.20213   -2.820713  1.631508
H      0.421268  -1.153303  -1.524681
H     -1.913195  2.395141  -0.900613
Si      3.004829  0.415344  -0.07791
H     -3.216754  1.374819  -0.962
H      4.979225  1.030832  0.800686
Si      2.57748   -2.668817  -0.156068
H      0.697549  -3.501226  -1.128287
O     -5.054584  -2.410652  -0.487071
H     -5.297861  -2.498963  -1.413611
O     -2.608304  -1.231756  -0.844615
O     -4.661198  0.295064  -0.544483
H     -5.434267  0.626004  -0.07619
O     -3.873999  -1.291993  1.53468
H     -3.019622  -0.902123  1.802684
O     -0.364247  -2.571325  2.036745
H     -0.951168  -3.151929  1.540264
H     -0.68389   -1.655549  1.840152
Si     -4.035272  -1.188788  -0.096714
H      0.312547  5.505971  1.221514
Si      0.209625  3.444812  0.298026
Al     -1.338373  -0.05631   -0.451872
    
```

```

Frequencies --  -99.3800    22.5648    29.9862
Frequencies --   32.5386    42.6769    47.8927
Frequencies --   51.6409    56.9010    66.6368
    
```

```

Zero-point correction=      0.273861 (Hartree/Particle)
Thermal correction to Energy=  0.308419
Thermal correction to Enthalpy= 0.309363
Thermal correction to Gibbs Free Energy=  0.207901
Sum of electronic and zero-point Energies= -2841.723523
Sum of electronic and thermal Energies= -2841.688964
Sum of electronic and thermal Enthalpies= -2841.688020
Sum of electronic and thermal Free Energies= -2841.789482
    
```

### Switch-4-INTc-CAMhighB.log

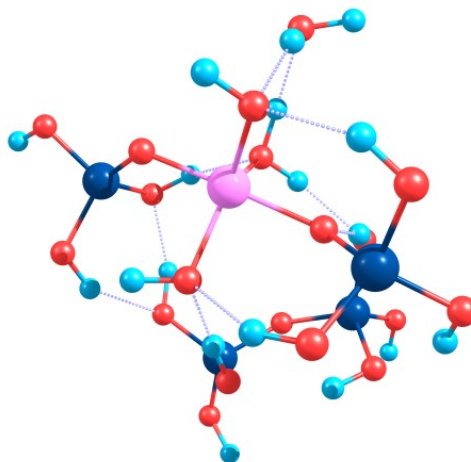

```

42
O     -3.170127  -0.746874  -0.184699
O     -1.758274  0.078849  1.941306
O     -3.480611  -1.839346  2.282935
O     -1.280009  -2.343135  0.822071
O     -1.021348  -4.234292  -1.099709
O     -0.882589  -1.629468  -1.689882
O      1.078888  -2.947502  -0.297657
O      1.166648  3.167588  -0.137601
O      2.748841  0.942856  -0.109002
O      0.69199   0.438282  -1.697036
O      0.942572  0.700258  1.766182
O      2.697228  -1.382587  1.203293
O      3.274752  -1.438725  -1.364661
O      5.039984  -0.294973  0.25599
H     -0.286369  -0.820973  -1.721277
H     -3.852609  -2.707662  2.099953
H      1.516864  -2.480282  0.444277
H      1.50347   0.181236  -2.146806
H      1.170041  1.514373  2.301561
H      2.521203  -2.048114  -1.339475
H      5.590268  -1.081685  0.1959
H     -2.64375   -0.929648  -0.982117
H     -1.525432  0.769435  1.244331
Si     -0.519294  -2.76947   -0.575945
H     -1.840951  -4.275127  -1.601498
H      2.015992  3.48355   -0.459168
Si     -2.417999  -1.225417  -1.210005
Si      3.431786  -0.498479  -0.015237
H      2.172836  -0.799543  1.777158
O     -1.47098   3.940146  -0.828289
H     -0.525173  4.024454  -0.59698
O     -0.849632  1.501065  0.062155
O     -3.388127  2.146901  -0.573253
H     -3.618864  1.213766  -0.438506
O     -1.54225   1.786912  -2.496362
H     -0.714515  1.265129  -2.520462
H      0.067452  0.388911  2.075729
O      1.446921  3.135426  2.587316
H      0.701183  3.529891  3.053906
H      1.341818  3.402504  1.645438
Si     -1.800532  2.329889  -0.957695
    
```

```

Frequencies --  34.5540    42.7975    45.7332
Frequencies --  48.7962    53.8515    55.2022
Frequencies --  69.1654    77.1472    91.4873
    
```

```

Zero-point correction=      0.277635 (Hartree/Particle)
Thermal correction to Energy=  0.311263
Thermal correction to Enthalpy= 0.312207
Thermal correction to Gibbs Free Energy=  0.215232
Sum of electronic and zero-point Energies= -2841.745673
Sum of electronic and thermal Energies= -2841.712045
Sum of electronic and thermal Enthalpies= -2841.711100
Sum of electronic and thermal Free Energies= -2841.808075
    
```

### Switch-4-TS2-CAMhighB.log

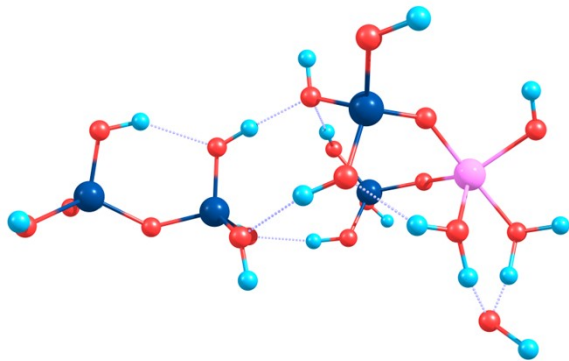

```

42
O      -5.071054  1.153499  -0.97823
O      -6.210875  0.720565  1.439125
O      -6.520135  -1.071934  -0.334942
O      -4.042567  -0.691897  0.627343
O      -1.754839  -1.995539  0.167836
O      -2.347698  0.462281  -0.962746
O      -1.638708  0.217188  1.559415
O      5.263594   1.201906  -0.522911
O      3.176367  -1.09396   -0.88482
O      3.059664  0.499409   1.7387
O      5.094266  -0.893011  0.961937
O      1.918101  -3.284553  -1.803488
O      1.010545  -1.903378  0.368999
O      0.754275  -1.05365   -2.184589
H      -1.49167   0.903075  -1.16002
H      -6.227567  -1.709026  -0.993271
H      -1.482547  -0.277112  2.37214
H      3.320983   -0.278287  2.450901
H      0.053832  -2.073154  0.339297
H      0.510919  -0.135803  -1.985651
H      -4.134321  1.162232  -1.237452
Si     -2.451224  -0.51874   0.334239
H      -2.165626  -2.647353  -0.410426
Si     -5.44233  0.045602  0.168012
Si     1.756226  -1.792479  -1.102897
H      2.603929  -3.843081  -1.427144
O      0.041113  1.592462  -1.459296
H      -0.017788  2.08993   -2.284335
O      2.640475  1.571781  -0.629183
O      1.101972  3.792989  -0.52586
H      1.907046  4.280255  -0.327057
O      0.653123  1.668084  1.114738
H      2.136559  0.808931  1.769002
H      -0.220053  1.251075  1.235946
H      5.923434  -0.424198  1.098375
H      4.987604  2.016947  -0.94808
H      -5.802903  1.487382  1.851633
O      3.953948  -1.336424  3.027626
H      4.673056  -1.195607  1.985215
H      4.460903  -1.017938  3.780903

Frequencies --  -786.7007      13.7601      19.5438
Frequencies --   27.5185      33.4122      40.0155
Frequencies --   42.7715      46.8714      54.1336
    
```

```

Zero-point correction=      0.268006 (Hartree/Particle)
Thermal correction to Energy=      0.303579
Thermal correction to Enthalpy=     0.304523
Thermal correction to Gibbs Free Energy=  0.198800
Sum of electronic and zero-point Energies= -2841.714113
Sum of electronic and thermal Energies= -2841.678541
Sum of electronic and thermal Enthalpies= -2841.677597
Sum of electronic and thermal Free Energies= -2841.783319
    
```

### Switch-4-PRD1-CAMhighB.log

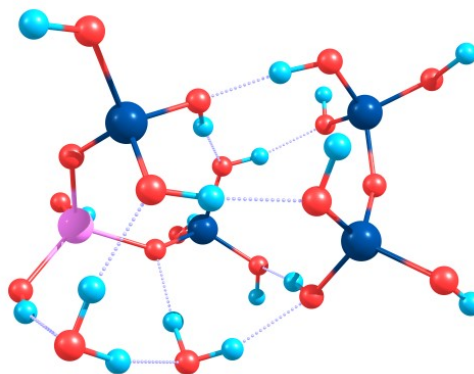

```

42
O      -1.19944  -0.031681  2.415532
O      -1.655941  -2.021722  0.701874
O      -3.423197  -1.526212  2.574641
O      -3.089542  0.24702   0.564971
O      -2.742555  -0.686516  -1.920989
O      -4.971874  0.640873  -1.336061
O      -2.701009  1.992786  -1.301234
O      1.541385   -0.354786  2.994563
O      1.902722  0.961486   0.588383
O      4.034733  1.638937  -1.184963
O      4.403824  -0.509143  0.738589
O      -0.187812  2.333001  1.587396
O      1.822797  3.554827  0.208347
O      0.00207   1.929442  -1.000691
H      -5.476029  -0.169665  -1.458682
H      -3.918037  -0.970552  3.185156
H      -2.923962  2.429091  -2.131544
H      3.77394   2.499192  -0.844401
H      1.394054  4.360025  -0.098693
H      -0.95317  2.143943  -1.018972
H      -0.921682  0.858034  2.101254
Si     -3.377022  0.511874  -1.021772
H      -1.759425  -0.752645  -1.964361
Si     -2.355661  -0.806523  1.571424
Si     0.909625  2.194949  0.346667
H      0.09679   2.812469  2.373794
O      -0.069862  -0.594969  -1.933014
H      0.05492   0.33948   -1.656192
O      2.588297  -0.844009  -1.503884
O      0.895497  -2.404584  -0.173879
H      2.169213  -2.621274  1.127355
O      1.134553  -2.679459  -2.853111
H      1.6995   -3.454928  -2.790713
H      0.001669  -2.292217  0.206164
H      1.734002  0.172821  2.194363
H      0.5783   -0.467888  2.954868
O      2.769549  -2.542186  1.890869
H      2.339798  -1.841991  2.424524
H      4.008596  -1.275172  1.184931
H      -2.177636  -2.385908  -0.023479
Al     3.287518  0.2921   -0.339795
Si     1.187905  -1.614941  -1.596801
    
```

```

Frequencies --  30.0090      44.4743      47.5511
Frequencies --  54.0265      56.7613      58.4027
Frequencies --  62.0592      66.3373      71.8763
    
```

```

Zero-point correction=      0.274904 (Hartree/Particle)
Thermal correction to Energy=      0.310785
Thermal correction to Enthalpy=     0.311730
Thermal correction to Gibbs Free Energy=  0.209236
Sum of electronic and zero-point Energies= -2841.747450
Sum of electronic and thermal Energies= -2841.711569
Sum of electronic and thermal Enthalpies= -2841.710625
Sum of electronic and thermal Free Energies= -2841.813118
    
```

### Switch-4-RCT2-CAMhighB.log

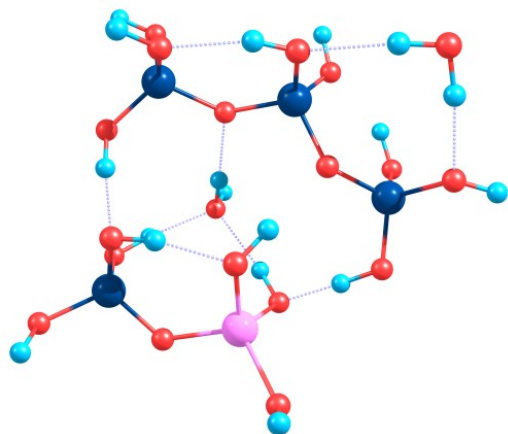

```

42
O      3.633887  0.457277  1.454843
O      2.755339  0.725458 -1.082053
O      5.311964  0.096884 -0.449324
O      3.282785 -1.701481 -0.164927
O      1.729349 -3.936827 -1.235283
O      0.846605 -2.623403  1.11382
O      0.852219 -1.100177 -1.380355
O      -4.860594 0.153267 -1.823044
O      -0.611312 1.737155  0.457507
O      -3.174924 1.199706  1.192915
O      -2.527927 1.723759 -1.388986
O      1.820233  2.873968  0.125126
O      -0.296241 3.311262 -1.544206
O      -0.253562 4.27191  1.021485
H      0.860262 -1.816669  1.654134
H      5.593048 -0.195176 -1.321197
H      -0.055838 -0.906229 -1.12078
H      -3.542764 2.064898  1.400199
H      0.154349  3.936548 -2.120206
H      0.250156  5.091878  1.037942
H      2.734966  0.377273  1.82975
H      1.960327  0.182926 -1.336945
H      1.70722  -3.936937 -2.194399
Si     3.735473 -0.160838 -0.061755
Si     0.224864 3.08734  0.006
H      2.21494  2.107787 -0.366189
O      -1.571773 -3.155906  0.536096
O      -1.811413 -0.548111 -0.123142
O      -3.75797  -2.189094 -0.648339
O      -3.178108 -1.554915  1.944236
H      -3.480448 -0.640811  2.047524
H      -4.080483 0.699884 -1.990023
H      -4.499453 -0.702483 -1.543394
H      -1.880765 2.3201  -1.806978
H      -4.372521 -2.910439 -0.478711
O      0.984408 0.031863  2.098244
H      0.66036  0.266626  2.975567
H      0.455876 0.564618  1.478713
H      -0.618435 -2.983902  0.84169
Si     -2.571634 -1.898028  0.458686
Si     -2.041124 1.059322  0.021933
  
```

```

Frequencies -- 16.6159      21.5417      25.9530
Frequencies -- 44.1111      50.2663      52.4183
Frequencies -- 61.3186      66.2271      69.6764
  
```

```

Zero-point correction=      0.272776 (Hartree/Particle)
Thermal correction to Energy=      0.309422
Thermal correction to Enthalpy=      0.310366
Thermal correction to Gibbs Free Energy=      0.204328
Sum of electronic and zero-point Energies= -2841.736790
Sum of electronic and thermal Energies= -2841.700144
Sum of electronic and thermal Enthalpies= -2841.699200
Sum of electronic and thermal Free Energies= -2841.805238
  
```

### Switch-4-TS3-CAMhighb.log

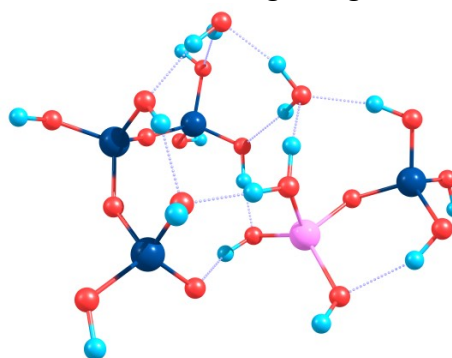

```

42
O      -3.908537 -1.194502  1.628224
O      -5.544024 -1.244581 -0.384916
O      -4.794925  1.147887  0.580492
O      -3.005571 -0.317062 -0.738621
O      -2.768542  2.45886  -0.931683
O      -1.135602  0.910655  0.880894
O      -0.597352  0.517233 -1.990939
O      1.074652 -2.444005  2.612413
O      2.7329  -1.192669 -0.658464
O      2.420315 -0.138471  1.798102
O      4.806207 -0.23102  0.512599
O      0.118395 -1.774653 -1.039561
O      2.151956 -2.865308 -2.52007
O      1.630139 -3.546024  0.06495
H      -0.3505  1.446646  1.171092
H      -4.24511  1.825406  0.142821
H      0.067473  1.245214 -1.917907
H      1.609599 -1.643328  2.45356
H      1.576039 -3.478938 -2.987401
H      2.386141 -4.143472  0.068172
H      -2.970078 -1.460007  1.669299
H      -5.984301 -0.851868 -1.144415
H      -2.327274  3.290046 -0.740422
Si     -4.285487 -0.389369  0.247417
Si     1.643876 -2.334564 -1.056925
H      -0.086371 -0.886244 -1.476905
O      0.612533  2.706269 -1.200174
O      2.848793  1.449799 -0.281678
O      2.603743  4.019656  0.166612
O      1.062087  2.23235  1.431717
H      1.868004  0.643408  1.989169
H      -0.443053 -1.932553  2.008134
H      1.299535 -3.014845  1.857317
H      5.278167  0.361109  1.106365
H      2.2247  4.823485 -0.20059
O      -1.174894 -1.61082  1.424729
H      -0.886722 -1.860967  0.523871
H      -1.075933 -0.02668  1.240836
Si     1.717965  2.650186 -0.092733
Si     3.19691  -0.005631  0.347716
  
```

```

Frequencies -- -44.5494      24.7724      40.7080
Frequencies -- 44.5853      47.3825      61.4808
Frequencies -- 63.7183      68.2469      83.6329
  
```

```

Zero-point correction=      0.276064 (Hartree/Particle)
Thermal correction to Energy=      0.310017
Thermal correction to Enthalpy=      0.310961
Thermal correction to Gibbs Free Energy=      0.212993
Sum of electronic and zero-point Energies= -2841.727046
Sum of electronic and thermal Energies= -2841.693093
Sum of electronic and thermal Enthalpies= -2841.692149
Sum of electronic and thermal Free Energies= -2841.790118
  
```

Switch-4-INT2-CAMhighb.log

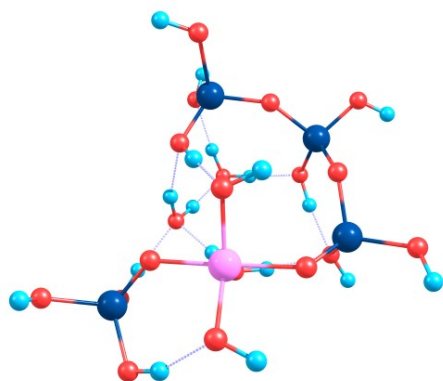

```

42
O      -3.766991  -1.237584  1.639657
O      -4.935248  -1.688859  -0.636629
O      -4.764278  0.849036  0.262841
O      -2.56124   -0.368407  -0.621189
O      -2.880359  2.209857  -1.073786
O      -1.122486  0.840807  1.154985
O      -0.409959  0.220632  -1.885337
O      1.372499   -2.214829  2.744062
O      2.681665   -1.086652  -0.697017
O      2.552338   0.111839  1.691155
O      4.624551   0.455943  -0.049018
O      0.160003  -2.01665   -0.86562
O      2.246484   -3.002524  -2.35347
O      1.948899   -3.485466  0.303722
H      -0.412521  1.348397  1.589885
H      -4.217505  1.537368  -0.188452
H      0.402735   0.694144  -2.084658
H      1.833685   -1.393952  2.491083
H      1.728742   -3.720006  -2.732442
H      2.770925   -3.987757  0.302376
H      -2.855114  -1.544456  1.789401
H      -5.146431  -1.475492  -1.550123
H      -2.636001  3.135394  -0.997422
Si     -3.956642   -0.588646  0.131389
Si     1.734534   -2.397215  -0.919641
H      -0.100981  -1.127856  -1.318101
O      -0.29095   2.563894  -0.652104
O      2.203016   1.547899  -0.514027
O      1.873287   4.161781  -0.297698
O      1.094749   2.428844  1.644074
H      2.070506   0.891108  2.026637
H      -0.243543  -1.9302   2.179555
H      1.620485   -2.833769  2.035203
H      5.031157   1.223228  0.365668
H      1.294248   4.886676  -0.552427
O      -1.035315  -1.72167  1.629079
H      -0.762222  -1.947434  0.715888
H      -1.088219  -0.116873  1.441515
Si     1.15177    2.718001  -0.01648
Si     3.009197   0.274906  0.11458
    
```

```

Frequencies -- 34.9003    40.7319    45.1474
Frequencies -- 49.4853    61.2069    63.5846
Frequencies -- 70.3486    75.7855    89.2960
    
```

```

Zero-point correction=      0.277407 (Hartree/Particle)
Thermal correction to Energy=      0.311674
Thermal correction to Enthalpy=     0.312618
Thermal correction to Gibbs Free Energy= 0.214595
Sum of electronic and zero-point Energies= -2841.748299
Sum of electronic and thermal Energies= -2841.714032
Sum of electronic and thermal Enthalpies= -2841.713088
Sum of electronic and thermal Free Energies= -2841.811111
    
```

Switch-4-PRD2-CAMhighb.log

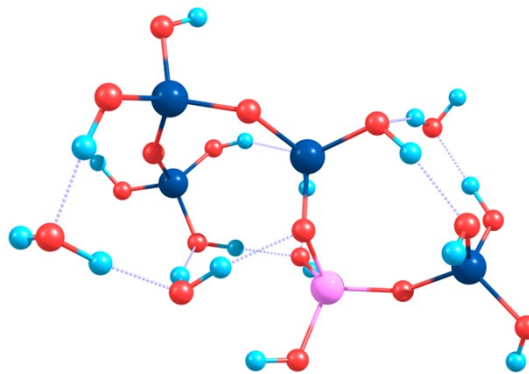

```

42
O      3.515673   -2.746434  0.50136
O      3.357523   -1.003702  2.429334
O      3.133622   -0.121379  -0.062536
O      4.311547   1.236153  -2.041309
O      2.41156   -0.563763  -2.604724
O      0.011935  -1.142914  -1.371261
O      -2.892401  -2.731263  -1.620447
O      -3.236649  1.168365  -0.33221
O      -0.752485  1.416398  -1.8262
O      -1.373377  3.205007  0.473691
O      -4.787673  -1.008087  -0.773788
O      -3.577794  -0.748776  1.546313
O      -5.593968  0.870867  0.916215
H      1.59726   -1.018747  -2.321456
H      3.436911   -0.0397   2.650384
H      2.716475   1.921867  2.351568
H      -1.135477  1.812298  -2.613791
H      -3.295606  -0.232744  2.309773
H      -5.816737  1.716098  0.514905
Si     2.912968   0.565057  -1.530992
H      5.114003   0.713055  -1.952567
Si     2.787179   -1.35216  0.955583
Si     -4.273604  0.111495  0.294126
H      -4.117797  -1.632328  -1.137788
O      -0.631388  0.409051  0.703293
O      1.336871   2.289038  1.360149
O      1.165601   -1.593452  0.961855
O      -1.401102  -2.169453  0.676787
H      -2.181806  -1.763424  1.111692
H      -3.24706   -3.625675  -1.670293
H      -2.304587  -2.725812  -0.841687
H      -0.508658  3.356381  0.871057
H      3.058791   -3.286143  -0.150691
O      3.500177   1.601867  2.854656
H      4.262475   1.928169  2.363728
H      1.649724   2.25009  0.436694
O      1.857508   1.808453  -1.377826
H      0.918265   1.690551  -1.6726
H      -0.371831  -0.348839  -1.805608
Si     -0.223429  -1.091752  0.270984
    
```

```

Frequencies -- 23.3708    29.4132    38.5859
Frequencies -- 40.6683    50.8224    58.4387
Frequencies -- 68.6466    71.7474    78.9716
    
```

```

Zero-point correction=      0.276158 (Hartree/Particle)
Thermal correction to Energy=      0.311740
Thermal correction to Enthalpy=     0.312684
Thermal correction to Gibbs Free Energy= 0.210215
Sum of electronic and zero-point Energies= -2841.759798
Sum of electronic and thermal Energies= -2841.724216
Sum of electronic and thermal Enthalpies= -2841.723272
Sum of electronic and thermal Free Energies= -2841.825741
    
```
